# Supplementary material for: Gene Expression Profiles Deciphering Rice Phenotypic Variation between Nipponbare (Japonica) and 93-11 (Indica) during Oxidative Stress
Source: PLoS One. 2010 Jan 8;5(1):e8632. doi: 10.1371/journal.pone.0008632 (PMC2799674; doi:10.1371/journal.pone.0008632)
Supplement: Table S1 — 1062 CIPs with differential expression between indica (93-11) and japonica (Nipponbare) under MV treatment. (0.24 MB PDF) [file pone.0008632.s005.pdf]

Table S1. 1062 CIPs with differential expression between indica (93-11) and japonica (Nipponbare) under MV treatment

| Probe Set ID           | Locus ID       | probe # | ANOVA $\chi^2$ -value |         |              |         | FDR $q$ -value |         |          |          | Nipponbare MV |          |          | Nipponbare CK |          |          | 93-11 MV |          |          | 93-11 CK |                    |                   | Indel (Indica vs Japonica) |                                                                           | Annotation                                                                                             |
|------------------------|----------------|---------|-----------------------|---------|--------------|---------|----------------|---------|----------|----------|---------------|----------|----------|---------------|----------|----------|----------|----------|----------|----------|--------------------|-------------------|----------------------------|---------------------------------------------------------------------------|--------------------------------------------------------------------------------------------------------|
|                        |                |         | $\chi^2$ (a)          |         | $\chi^2$ (b) |         | $\chi^2$ (c)   |         | Repeat 1 | Repeat 2 | Repeat 3      | Repeat 1 | Repeat 2 | Repeat 3      | Repeat 1 | Repeat 2 | Repeat 3 | Repeat 1 | Repeat 2 | Repeat 3 | upstream           | downstream        |                            |                                                                           |                                                                                                        |
|                        |                |         | C                     | T       | C            | T       | C              | T       | C        | T        | C             | T        | C        | T             | C        | T        | C        | T        | C        | T        | C                  | T                 | C                          | T                                                                         |                                                                                                        |
| Os.30617.1.S1_at       | LOC_Os01g02110 | 4       | 1.8E-04               | 5.2E-06 | 3.6E-04      | 1.6E-03 | 7.9E-04        | 5.6E-02 | 44.1     | 47.3     | 31.8          | 255.7    | 154.4    | 167.6         | 17.4     | 45.8     | 34.5     | 289.1    | 252.8    | 194.2    | Yes <sup>(a)</sup> | No <sup>(b)</sup> | No                         | helix-loop-helix DNA-binding domain containing protein, expressed         |                                                                                                        |
| Os.30376.1.S1_at       | LOC_Os01g02130 | 5       | 2.6E-08               | 2.9E-04 | 1.3E-04      | 2.7E-06 | 1.3E-02        | 3.0E-02 | 538.3    | 538.9    | 628.1         | 343.2    | 338.8    | 424.2         | 34.6     | 47.5     | 13.3     | 4.9      | 40       | 40.2     | No                 | Yes               | Yes                        | expressed protein                                                         |                                                                                                        |
| Os.32123.1.S1_at       | LOC_Os01g02930 | 6       | 5.6E-06               | 1.9E-08 | 1.7E-05      | 1.1E-04 | 2.1E-05        | 7.9E-03 | 345.1    | 424.7    | 373.2         | 1155.4   | 855.5    | 946.5         | 317.3    | 325.6    | 279.7    | 2185.2   | 1812     | 955.6    | No                 | No                | No                         | glycosyltransferase, putative, expressed                                  |                                                                                                        |
| Os.38065.1.S1_at       | LOC_Os01g03030 | 11      | 2.1E-06               | 1.1E-06 | 5.2E-05      | 5.6E-05 | 2.8E-04        | 1.6E-02 | 3000.3   | 2760.4   | 2859.7        | 1378.1   | 1226.7   | 1449.5        | 1420.4   | 1369.4   | 1260.4   | 1320.7   | 1130.8   | 1032.2   | Yes                | No                | Yes                        | alanyl-tRNA synthetase, putative, expressed                               |                                                                                                        |
| Os.22594.1.S1_at       | LOC_Os01g03390 | 5       | 7.6E-09               | 1.8E-09 | 3.2E-06      | 1.3E-06 | 5.2E-06        | 2.6E-03 | 3851     | 343.2    | 4111.3        | 1563.8   | 1574     | 1936.9        | 2056.5   | 2145.3   | 2000.2   | 1004.3   | 1269.8   | 1098     | No                 | No                | No                         | Boman-Birk type bran trypsin inhibitor precursor, putative, expressed     |                                                                                                        |
| Os.29768.1.S1_at       | LOC_Os01g03620 | 5       | 6.1E-08               | 6.9E-09 | 1.5E-07      | 4.8E-06 | 1.1E-05        | 3.9E-04 | 53.8     | 16.6     | 11.6          | 330.1    | 263      | 208.8         | 10.1     | 9        | 12       | 133.2    | 27.5     | 69.3     | No                 | No                | Yes                        | transposon binding protein, putative, expressed                           |                                                                                                        |
| Os.21801.1.S1_at       | LOC_Os01g04620 | 6       | 1.1E-04               | 1.1E-07 | 2.4E-05      | 1.1E-03 | 6.9E-03        | 9.9E-03 | 429.5    | 393.1    | 349.1         | 75.3     | 17.5     | 38.8          | 127      | 243.1    | 199.3    | 19.4     | 17.1     | 13.6     | No                 | No                | No                         | expressed protein                                                         |                                                                                                        |
| Os.16097.1.S1_a_at     | LOC_Os01g04660 | 3       | 1.4E-04               | 7.4E-05 | 1.7E-04      | 1.3E-03 | 4.9E-03        | 3.5E-02 | 180.8    | 169.6    | 124           | 49       | 48       | 9             | 68.9     | 7.6      | 31.1     | 2.6      | 7.8      | 21.6     | No                 | No                | No                         | lipid phosphate phosphatase 3, chloroplast precursor, putative, expressed |                                                                                                        |
| Os.38086.1.S1_at       | LOC_Os01g05530 | 3       | 7.4E-10               | 1.5E-04 | 4.2E-04      | 3.2E-07 | 8.1E-03        | 3.2E-02 | 1882.9   | 1793.7   | 2080.3        | 2436.7   | 2115.4   | 2702          | 258.6    | 174.7    | 258.4    | 306.5    | 267.9    | 381.2    | Yes                | No                | No                         | expressed protein                                                         |                                                                                                        |
| Os.33885.1.S1_at       | LOC_Os01g06220 | 8       | 3.2E-09               | 1.0E-10 | 2.2E-08      | 7.4E-07 | 1.3E-06        | 1.2E-04 | 9131.7   | 8241.4   | 8249.3        | 1252.9   | 1375.6   | 1146.3        | 3616.3   | 4946.3   | 3575.5   | 707.5    | 609.2    | 645.5    | No                 | No                | No                         | gibberellin receptor GID2L, putative, expressed                           |                                                                                                        |
| Os.6389.1.S1_at        | LOC_Os01g06310 | 3       | 2.4E-05               | 9.1E-07 | 3.1E-04      | 3.4E-04 | 2.5E-04        | 5.1E-02 | 334.6    | 227.3    | 208.1         | 28.9     | 150.7    | 82.4          | 213.9    | 168.1    | 192.7    | 77.6     | 119.8    | 48.6     | Yes                | Yes               | Yes                        | Yes                                                                       | glycine-rich cell wall structural protein precursor, putative, expressed                               |
| Os.46028.1.S1_at       | LOC_Os01g06510 | 6       | 3.9E-09               | 2.1E-06 | 2.8E-06      | 8.3E-07 | 4.4E-04        | 2.4E-03 | 341.8    | 336.7    | 261.3         | 180.7    | 149.7    | 147.7         | 3.6      | 30.8     | 27.8     | 5.4      | 45.1     | 8.9      | Yes                | Yes               | Yes                        | Yes                                                                       | arginyl-tRNA synthetase, putative, expressed                                                           |
| Os.11371.1.S1_at       | LOC_Os01g06740 | 9       | 1.2E-08               | 3.4E-08 | 3.3E-08      | 1.7E-06 | 3.0E-05        | 1.5E-04 | 558      | 607      | 558           | 67.9     | 88.9     | 65.1          | 18.9     | 34.9     | 2.3      | 5        | 3.1      | 27.3     | Yes                | Yes               | Yes                        | Yes                                                                       | protein synthesis inhibitor I, putative, expressed                                                     |
| OsAffx.23143.1.S1_at   | LOC_Os01g06940 | 3       | 2.5E-06               | 2.8E-06 | 8.2E-06      | 6.4E-05 | 5.3E-04        | 4.9E-03 | 22.3     | 8.7      | 4.2           | 13.7     | 67.6     | 19.9          | 11.6     | 78.5     | 21.3     | 130.8    | 95.2     | 100.4    | Yes                | No                | Yes                        | Yes                                                                       | expressed protein                                                                                      |
| OsAffx.23143.1.S1_x_at | LOC_Os01g06940 | 4       | 3.4E-07               | 8.9E-07 | 1.2E-06      | 1.6E-05 | 2.4E-04        | 1.4E-03 | 24.5     | 4.8      | 9.3           | 77.7     | 17       | 48.4          | 48.3     | 20.2     | 18.1     | 302.2    | 186.5    | 258.5    | Yes                | No                | Yes                        | Yes                                                                       | expressed protein                                                                                      |
| OsAffx.23143.1.S1_x_at | LOC_Os01g06980 | 5       | 7.6E-05               | 7.3E-05 | 9.5E-05      | 8.3E-04 | 4.9E-03        | 2.4E-02 | 16.1     | 6.1      | 30.7          | 76.8     | 55.4     | 51.4          | 39.6     | 7.4      | 5.2      | 270.8    | 254.6    | 317.3    | Yes                | Yes               | Yes                        | Yes                                                                       | conserved hypothetical protein                                                                         |
| OsAffx.23143.1.S1_x_at | LOC_Os01g06980 | 9       | 2.1E-08               | 2.3E-08 | 2.5E-08      | 2.4E-06 | 2.3E-05        | 1.3E-04 | 65       | 41.6     | 39            | 102      | 90.5     | 69.4          | 88.8     | 74.8     | 92       | 1220.5   | 1133.6   | 944.8    | Yes                | Yes               | Yes                        | Yes                                                                       | conserved hypothetical protein                                                                         |
| OsAffx.23143.1.S1_x_at | LOC_Os01g07000 | 9       | 5.8E-07               | 8.2E-07 | 1.0E-06      | 2.2E-05 | 2.3E-04        | 1.7E-03 | 9.7      | 7.2      | 7.5           | 142.6    | 83.3     | 12.9          | 51.6     | 80.8     | 45.7     | 3807.5   | 2872     | 2836.2   | Yes                | Yes               | Yes                        | Yes                                                                       | conserved hypothetical protein                                                                         |
| OsAffx.23143.1.S1_x_at | LOC_Os01g07010 | 11      | 1.0E-05               | 1.3E-05 | 1.6E-05      | 1.8E-04 | 1.5E-03        | 7.7E-03 | 10.2     | 45.5     | 26.4          | 225.2    | 167.9    | 114.8         | 158.8    | 232.1    | 116.8    | 4558.7   | 3341.7   | 3196.6   | No                 | No                | Yes                        | Yes                                                                       | proline-rich protein 1, putative                                                                       |
| OsAffx.10948.1.S1_at   | LOC_Os01g07030 | 7       | 3.9E-06               | 2.9E-07 | 5.1E-06      | 8.9E-05 | 1.2E-04        | 3.5E-03 | 105.2    | 56.5     | 139.1         | 815.7    | 809.6    | 416.2         | 58.7     | 60.3     | 16.8     | 1613.8   | 1784.3   | 1425.3   | No                 | No                | No                         | Yes                                                                       | proline-rich protein, putative, expressed                                                              |
| Os.46013.1.S1_at       | LOC_Os01g07040 | 11      | 8.3E-07               | 4.0E-07 | 3.1E-06      | 2.9E-05 | 1.4E-04        | 1.5E-03 | 79.4     | 61.6     | 45.2          | 209.5    | 147.5    | 122           | 171.3    | 225.9    | 368      | 2870.4   | 2412.4   | 2164.4   | No                 | No                | No                         | Yes                                                                       | proline-rich protein, putative                                                                         |
| OsAffx.10949.1.S1_x_at | LOC_Os01g07060 | 6       | 5.5E-05               | 2.8E-06 | 8.8E-05      | 6.5E-04 | 5.4E-04        | 2.3E-02 | 14.7     | 10.8     | 6             | 138.6    | 22       | 145.5         | 8        | 9        | 9.8      | 518.7    | 483.5    | 704      | No                 | No                | No                         | No                                                                        | tyrosine-rich hydroxyproline-rich glycoprotein, putative                                               |
| Os.1665.1.S1_a_at      | LOC_Os01g07300 | 3       | 2.0E-09               | 1.4E-07 | 1.3E-07      | 5.4E-07 | 7.2E-05        | 3.4E-04 | 631.7    | 512      | 361.8         | 227.2    | 213.8    | 220.3         | 155.2    | 152.4    | 242.5    | 79.5     | 153.7    | 129.2    | No                 | No                | No                         | No                                                                        | expressed protein                                                                                      |
| Os.1665.2.S1_a_at      | LOC_Os01g07300 | 4       | 6.3E-07               | 1.5E-06 | 3.9E-06      | 2.4E-05 | 3.4E-04        | 3.0E-03 | 381.7    | 373.9    | 292.6         | 216.3    | 182.4    | 213           | 131.4    | 201.8    | 227.7    | 141.7    | 198.3    | 155.1    | No                 | No                | No                         | No                                                                        | vegetative storage protein PNI283, putative, expressed                                                 |
| Os.16494.1.S1_at       | LOC_Os01g07370 | 3       | 3.7E-07               | 2.5E-06 | 7.2E-04      | 1.6E-05 | 4.9E-04        | 8.7E-02 | 512.6    | 632.5    | 608.4         | 716.2    | 1050.5   | 629.3         | 692.9    | 989.8    | 724.4    | 1263.5   | 1398.2   | 1325.7   | No                 | Yes               | No                         | Yes                                                                       | thiorodioxin H-type, putative, expressed                                                               |
| Os.51043.1.S1_at       | LOC_Os01g07730 | 6       | 8.8E-08               | 1.2E-05 | 2.1E-05      | 6.1E-06 | 1.5E-03        | 9.1E-03 | 2122.6   | 2318.8   | 2172.6        | 825.8    | 637.6    | 1040.1        | 443.7    | 588.5    | 493      | 357.7    | 330.8    | 388.1    | No                 | No                | No                         | No                                                                        | triose phosphate/phosphate translocator, non-green plastid, chloroplast precursor, putative, expressed |
| Os.15532.1.S1_at       | LOC_Os01g07870 | 2       | 2.5E-05               | 6.4E-05 | 5.4E-05      | 3.5E-04 | 4.4E-03        | 1.7E-02 | 459.5    | 526      | 393.9         | 419.2    | 366.3    | 356.9         | 631      | 1013.1   | 690.1    | 333.7    | 290.3    | 310.7    | Yes                | Yes               | Yes                        | Yes                                                                       | multidrug resistance-associated protein 3, putative, expressed                                         |
| Os.9695.2.S1_at        | LOC_Os01g08300 | 5       | 3.7E-07               | 5.5E-08 | 8.9E-06      | 1.6E-05 | 4.0E-05        | 5.2E-03 | 704.7    | 517.3    | 619.4         | 332.7    | 271.9    | 346.6         | 43.2     | 311.4    | 375.3    | 311.4    | 197.9    | 218.2    | No                 | No                | No                         | No                                                                        | F-box domain containing protein, expressed                                                             |
| Os.26887.2.S1_a_at     | LOC_Os01g10340 | 3       | 1.3E-08               | 3.2E-06 | 3.9E-06      | 1.7E-06 | 5.8E-04        | 3.0E-03 | 10.6     | 2.2      | 2.7           | 1.8      | 27.3     | 5.6           | 208.7    | 221.3    | 238.1    | 119.9    | 192      | 224.2    | No                 | Yes               | No                         | Yes                                                                       | electron transporter, putative, expressed                                                              |
| Os.55837.1.S1_at       | LOC_Os01g10370 | 4       | 5.8E-06               | 6.6E-08 | 1.5E-05      | 1.2E-04 | 4.5E-05        | 7.5E-03 | 29.1     | 13.9     | 32.6          | 91.4     | 68.6     | 71.9          | 28.4     | 44.2     | 32.1     | 180.2    | 149.2    | 168.4    | No                 | No                | Yes                        | Yes                                                                       | transcriptional factor TIN1, putative, expressed                                                       |
| Os.18296.1.S1_x_at     | LOC_Os01g10440 | 4       | 5.3E-07               | 1.2E-06 | 2.8E-06      | 2.1E-05 | 3.0E-04        | 2.4E-03 | 310.5    | 346.4    | 295.2         | 110.3    | 75.3     | 189.6         | 111.9    | 59.1     | 110.3    | 74       | 62.6     | 69.6     | 50.8               | No                | No                         | No                                                                        | xylosyltransferase oxt, putative, expressed                                                            |
| Os.45991.1.S1_x_at     | LOC_Os01g10440 | 6       | 7.0E-07               | 3.5E-05 | 4.4E-05      | 2.5E-05 | 3.0E-03        | 1.2E-02 | 358.8    | 381.1    | 331           | 242.2    | 208.7    | 183.4         | 130.9    | 123.6    | 70.9     | 96.5     | 84.9     | 103      | No                 | No                | No                         | No                                                                        | xylosyltransferase oxt, putative, expressed                                                            |
| Os.15557.1.S1_at       | LOC_Os01g11600 | 11      | 1.7E-08               | 1.1E-10 | 4.9E-08      | 2.1E-06 | 1.3E-06        | 1.4E-04 | 3782.6   | 4571     | 4247.4        | 395      | 449.5    | 381.1         | 1595.4   | 1918.2   | 1674.1   | 338.2    | 313      | 340.6    | No                 | No                | No                         | No                                                                        | conserved hypothetical protein                                                                         |
| Os.12340.1.S1_at       | LOC_Os01g11720 | 4       | 3.7E-08               | 1.1E-08 | 1.9E-05      | 3.5E-06 | 1.5E-05        | 8.6E-03 | 4935.4   | 4849.8   | 5259.8        | 10285.8  | 9121.9   | 11649.4       | 2868.3   | 2537.3   | 2936.9   | 5971     | 5911.6   | 7881     | No                 | No                | No                         | No                                                                        | esterase precursor, putative, expressed                                                                |
| Os.49073.1.S1_at       | LOC_Os01g12570 | 11      | 1.0E-09               | 1.7E-08 | 3.2E-08      | 3.7E-07 | 2.0E-05        | 1.5E-04 | 223.4    | 234      | 194.5         | 728.5    | 557.7    | 512.5         | 184.4    | 1660.6   | 1603.3   | 7663.2   | 6499.3   | 6634.6   | No                 | No                | No                         | No                                                                        | 3-methyl-2-oxobutanoate hydroxymethyltransferase, putative, expressed                                  |
| OsAffx.23221.1.S1_x_at | LOC_Os01g12940 | 9       | 6.5E-09               | 2.1E-08 | 7.4E-08      | 1.1E-06 | 2.2E-05        | 5.5E-04 | 29.5     | 4.2      | 11.3          | 202.7    | 69.8     | 98.6          | 230.3    | 229.2    | 208      | 1050.6   | 888.2    | 1345.4   | No                 | No                | No                         | No                                                                        | vegetative storage protein PNI283, putative, expressed                                                 |
| Os.22846.1.A1_at       | LOC_Os01g13560 | 3       | 7.1E-05               | 3.1E-08 | 1.1E-03      | 7.9E-04 | 2.8E-05        | 1.1E-01 | 409.3    | 445.5    | 463.4         | 139      | 143.4    | 136.7         | 294.4    | 398.3    | 323.6    | 113.91   |          |          |                    |                   |                            |                                                                           |                                                                                                        |

| Probe Set ID            | Locus ID       | probe # | ANOVA p-value |         | FDR q-value |         | Nipponbare MW |         |          | Nipponbare CK |          |          | 93-11 MW |          |          | 93-11 CK |          |          | Indel (Indica vs Japonica) |          |          | Annotation |                                                                 |                                                                                               |                                          |
|-------------------------|----------------|---------|---------------|---------|-------------|---------|---------------|---------|----------|---------------|----------|----------|----------|----------|----------|----------|----------|----------|----------------------------|----------|----------|------------|-----------------------------------------------------------------|-----------------------------------------------------------------------------------------------|------------------------------------------|
|                         |                |         | C             | T       | CxT         | C       | T             | CxT     | Repeat 1 | Repeat 2      | Repeat 3 | Repeat 1 | Repeat 2 | Repeat 3 | Repeat 1 | Repeat 2 | Repeat 3 | Repeat 1 | Repeat 2                   | Repeat 3 | upstream |            | gene                                                            | downstream                                                                                    |                                          |
|                         |                |         |               |         |             |         |               |         |          |               |          |          |          |          |          |          |          |          |                            |          |          |            |                                                                 |                                                                                               |                                          |
| Os. 1043.1.S1_at        | LOC_Os01g42860 | 4       | 9.9E-06       | 6.6E-06 | 5.2E-05     | 1.8E-04 | 9.4E-04       | 1.6E-02 | 289.8    | 180.9         | 233.3    | 97.2     | 131.8    | 103.6    | 104.2    | 153      | 92.4     | 34.2     | 91.4                       | 88.2     | No       | No         | Yes                                                             | subtilisin-chymotrypsin inhibitor 2, putative, expressed                                      |                                          |
| Os. 21830.1.S1_at       | LOC_Os01g43110 | 6       | 2.6E-08       | 7.1E-05 | 7.7E-05     | 2.8E-06 | 4.8E-03       | 2.1E-02 | 55       | 50.2          | 43.4     | 76.3     | 56.7     | 63       | 190.9    | 253      | 225.9    | 381.2    | 509.8                      | 466.9    | No       | No         | No                                                              | expressed protein                                                                             |                                          |
| Os. 9195.1.S1_at        | LOC_Os01g43370 | 5       | 1.4E-05       | 2.9E-07 | 6.1E-05     | 2.3E-04 | 1.2E-04       | 1.8E-02 | 6525.7   | 6236.1        | 7149.7   | 2575.1   | 2434.5   | 2964.4   | 5511.8   | 4927.2   | 5363     | 3561.8   | 3553.6                     | 3819.4   | Yes      | No         | No                                                              | expressed protein                                                                             |                                          |
| Os. 767.1.S1_at         | LOC_Os01g43700 | 7       | 8.7E-05       | 6.2E-08 | 9.7E-05     | 9.2E-04 | 4.3E-05       | 2.4E-02 | 2084.8   | 1849.4        | 2018.5   | 809.1    | 820.1    | 827.4    | 1262.2   | 1430     | 1431     | 837.2    | 794.1                      | 810.1    | No       | No         | No                                                              | cytochrome P450 72A1, putative, expressed                                                     |                                          |
| Os. 6452.1.S1_at        | LOC_Os01g43710 | 2       | 4.1E-04       | 1.8E-04 | 2.1E-04     | 1.8E-03 | 9.0E-03       | 4.0E-02 | 220.2    | 167.7         | 49.4     | 1.8      | 36.1     | 51.3     | 49.4     | 1.8      | 36.1     | 64.8     | 29.8                       | 39.6     | No       | No         | No                                                              | cytochrome P450 72A1, putative, expressed                                                     |                                          |
| Os. 6452.2.A1_a_at      | LOC_Os01g43710 | 8       | 1.4E-05       | 9.5E-08 | 4.6E-05     | 2.3E-04 | 5.7E-05       | 1.5E-02 | 8454.6   | 8694.3        | 8098.8   | 3083.3   | 2537.4   | 2802.3   | 4415.9   | 5188     | 4566.9   | 2270.7   | 2406.2                     | 2243.2   | No       | No         | No                                                              | cytochrome P450 72A1, putative, expressed                                                     |                                          |
| Os. 33102.1.S1_at       | LOC_Os01g43740 | 9       | 3.4E-09       | 4.5E-11 | 3.7E-09     | 7.7E-07 | 8.5E-07       | 3.6E-05 | 2391.6   | 3194          | 2673.3   | 234      | 20.6     | 8.8      | 672.9    | 1283.4   | 927.4    | 36.2     | 7.4                        | 8        | No       | No         | No                                                              | cytochrome P450 72A1, putative, expressed                                                     |                                          |
| Os. 41199.1.S1_at       | LOC_Os01g43774 | 10      | 3.2E-07       | 3.1E-10 | 2.8E-07     | 1.5E-06 | 9.0E-06       | 5.7E-04 | 2675.2   | 3768.2        | 4838.8   | 51.8     | 99.4     | 19.1     | 1030.4   | 1049.6   | 969.9    | 52.6     | 22.5                       | 3.6      | No       | No         | No                                                              | cytochrome P450 72A1, putative, expressed                                                     |                                          |
| Os. 34501.1.S1_x_at     | LOC_Os01g43890 | 3       | 3.1E-06       | 5.7E-07 | 7.6E-06     | 3.4E-05 | 1.8E-04       | 4.6E-03 | 533.7    | 418.4         | 317.4    | 104.2    | 91.9     | 132.9    | 151.1    | 211      | 226.9    | 74.6     | 107.6                      | 92.6     | Yes      | No         | No                                                              | SCP150, putative, expressed                                                                   |                                          |
| Os. 12253.1.S1_at       | LOC_Os01g45110 | 11      | 9.1E-13       | 7.1E-14 | 1.1E-12     | 1.1E-08 | 9.2E-09       | 2.5E-07 | 10995.3  | 11227.6       | 10582.4  | 246.4    | 238.8    | 225.5    | 171.2    | 1534.9   | 1860.8   | 312.6    | 281.7                      | 200      | No       | No         | No                                                              | cytokinin-O-glucosyltransferase 1, putative, expressed                                        |                                          |
| OsAffx. 11519.1.S1_at   | LOC_Os01g48530 | 3       | 2.9E-04       | 8.3E-06 | 2.7E-03     | 2.3E-03 | 1.1E-03       | 1.9E-01 | 328.8    | 444.6         | 393.8    | 569.1    | 434.1    | 530.2    | 339.8    | 458.8    | 404.1    | 953.7    | 426.4                      | 706.2    | No       | No         | No                                                              | expressed protein                                                                             |                                          |
| Os. 4901.1.S1_at        | LOC_Os01g49160 | 4       | 3.3E-07       | 3.3E-06 | 6.5E-04     | 1.5E-05 | 5.9E-04       | 8.2E-02 | 983.8    | 992           | 946.5    | 497.9    | 462.3    | 559.8    | 556.5    | 497.9    | 402.3    | 339.1    | 278.9                      | 296.6    | No       | No         | No                                                              | myb-like DNA-binding domain containing protein, expressed                                     |                                          |
| Os. 26819.1.A1_at       | LOC_Os01g49614 | 4       | 3.4E-08       | 7.4E-04 | 1.1E-03     | 3.8E-06 | 2.4E-02       | 1.1E-10 | 20.8     | 7.1           | 11.1     | 1.4      | 1.3      | 1.2      | 68.2     | 85.2     | 101.6    | 59.5     | 65.1                       | 52.9     | Yes      | Yes        | Yes                                                             | Ser/Thr protein kinase, putative, expressed                                                   |                                          |
| Os. 38022.1.S1_at       | LOC_Os01g49710 | 3       | 3.6E-06       | 1.2E-10 | 7.4E-04     | 8.4E-05 | 1.4E-06       | 8.9E-02 | 475.8    | 440.4         | 365.3    | 92       | 129.5    | 76.2     | 427.1    | 544.4    | 335      | 167.3    | 155.5                      | 132.9    | No       | No         | Yes                                                             | glutathione S-transferase GSTU6, putative, expressed                                          |                                          |
| OsAffx. 11535.1.S1_at   | LOC_Os01g49720 | 4       | 1.2E-04       | 2.3E-07 | 1.5E-03     | 1.2E-03 | 1.0E-04       | 1.3E-01 | 802.9    | 590.6         | 632.8    | 165.2    | 130.2    | 145.4    | 353.8    | 298.3    | 372.7    | 87.4     | 57.4                       | 71.8     | Yes      | No         | No                                                              | glutathione S-transferase GSTU6, putative, expressed                                          |                                          |
| Os. 11800.1.S1_at       | LOC_Os01g50100 | 7       | 3.7E-08       | 2.9E-11 | 3.2E-08     | 3.5E-06 | 7.2E-07       | 1.5E-04 | 2729.1   | 3053.4        | 2479.4   | 200.0    | 280.3    | 253.2    | 1141.5   | 1574.5   | 1424.9   | 184      | 322.9                      | 226.2    | No       | Yes        | No                                                              | multidrug resistance protein 4, putative, expressed                                           |                                          |
| Os. 11800.1.S1_x_at     | LOC_Os01g50100 | 8       | 6.6E-06       | 5.6E-09 | 9.8E-06     | 1.3E-04 | 1.0E-05       | 6.6E-03 | 3993.8   | 4623.8        | 4188.2   | 376.8    | 462.8    | 458.2    | 278.3    | 2686.3   | 2290.9   | 331.7    | 511.8                      | 395.8    | No       | Yes        | No                                                              | multidrug resistance protein 4, putative, expressed                                           |                                          |
| Os. 39411.1.A1_at       | LOC_Os01g50100 | 7       | 2.2E-10       | 1.8E-10 | 8.3E-10     | 1.5E-07 | 1.6E-06       | 1.5E-05 | 1244     | 1481          | 1448.8   | 218.6    | 260.1    | 256.4    | 148.8    | 208.8    | 208.4    | 97.6     | 191.6                      | 114.2    | No       | Yes        | No                                                              | multidrug resistance protein 4, putative, expressed                                           |                                          |
| Os. 21788.1.S1_at       | LOC_Os01g50530 | 3       | 6.3E-04       | 1.2E-03 | 1.4E-03     | 4.3E-03 | 3.4E-02       | 1.3E-01 | 15.7     | 45.9          | 3        | 175.6    | 131.7    | 166.6    | 5.4      | 3.5      | 4.5      | 2.1      | 8.8                        | 21.2     | Yes      | Yes        | Yes                                                             | cytochrome P450 monooxygenase CYP711A, putative, expressed                                    |                                          |
| Os. 52529.1.S1_x_at     | LOC_Os01g50530 | 6       | 2.0E-05       | 6.9E-05 | 6.8E-05     | 3.0E-04 | 4.7E-03       | 1.9E-02 | 132.7    | 194.5         | 74.1     | 378.3    | 228.7    | 287.7    | 9.2      | 45.3     | 14.4     | 25.1     | 25.9                       | 10.5     | Yes      | Yes        | Yes                                                             | cytochrome P450 monooxygenase CYP711A, putative, expressed                                    |                                          |
| Os. 18272.1.S1_x_at     | LOC_Os01g50600 | 4       | 8.6E-05       | 1.5E-04 | 6.2E-05     | 9.1E-04 | 1.8E-02       | 1.8E-02 | 94       | 109.2         | 85.5     | 135      | 88.3     | 142.3    | 117.7    | 81.8     | 79.9     | 224.1    | 270                        | 282.2    | Yes      | No         | No                                                              | lipo-amino acid hydrolase ILH1-like 4 precursor, putative, expressed                          |                                          |
| Os. 4124.1.S1_a_at      | LOC_Os01g51390 | 3       | 9.9E-05       | 9.5E-05 | 1.5E-03     | 5.0E-04 | 5.8E-03       | 1.3E-01 | 2183.9   | 2328.3        | 1973.2   | 1154.4   | 1189     | 1066     | 1051.1   | 1225.9   | 149.9    | 968.3    | 885                        | 664.6    | Yes      | No         | Yes                                                             | mitochondrial-processing peptidase beta subunit, mitochondrial precursor, putative, expressed |                                          |
| Os. 37243.1.S1_at       | LOC_Os01g51670 | 10      | 2.8E-09       | 4.6E-06 | 4.5E-06     | 6.9E-07 | 7.3E-04       | 3.3E-03 | 2072.2   | 1809.9        | 2156.7   | 641.3    | 851.8    | 911.9    | 46.9     | 62       | 47.4     | 53.8     | 31.5                       | 50.4     | Yes      | Yes        | Yes                                                             | expressed protein                                                                             |                                          |
| Os. 30634.1.S1_at       | LOC_Os01g51690 | 2       | 8.8E-07       | 1.1E-06 | 8.8E-07     | 1.4E-05 | 2.9E-04       | 1.2E-03 | 693.3    | 502.2         | 506.1    | 122.6    | 92.7     | 94.3     | 51.5     | 47.5     | 102.4    | 7.8      | 45.4                       | 60.3     | Yes      | Yes        | Yes                                                             | OsWRKY26 - Superfamily of rice TFs having WRKY and zinc finger domains, expressed             |                                          |
| Os. 57351.1.S1_at       | LOC_Os01g52260 | 8       | 4.4E-07       | 1.5E-05 | 1.3E-05     | 1.8E-05 | 1.7E-03       | 6.9E-03 | 324.1    | 298.6         | 387.4    | 105.9    | 126.6    | 104.8    | 4        | 22.2     | 39.5     | 5        | 4                          | 5.7      | No       | No         | No                                                              | serine acetyltransferase 3, mitochondrial precursor, putative, expressed                      |                                          |
| Os. 32865.1.S1_at       | LOC_Os01g52470 | 4       | 1.2E-05       | 5.9E-06 | 8.6E-06     | 2.0E-04 | 8.7E-04       | 5.1E-02 | 237.6    | 270.3         | 179.6    | 4        | 4        | 8.8      | 115.7    | 60.3     | 105.0    | 108.6    | 3.5                        | 40.7     | 12.8     | Yes        | No                                                              | No                                                                                            | elongation factor 2, putative, expressed |
| Os. 29866.1.S1_at       | LOC_Os01g52530 | 6       | 2.4E-05       | 1.3E-06 | 3.0E-05     | 3.5E-04 | 3.1E-04       | 1.1E-02 | 964      | 1026.4        | 802.7    | 428.7    | 489.2    | 396.9    | 515      | 528.9    | 494.7    | 522.4    | 520.9                      | 424.3    | No       | Yes        | No                                                              | ribose-phosphate pyrophosphokinase 3, putative, expressed                                     |                                          |
| Os. 26924.1.A1_at       | LOC_Os01g54240 | 3       | 4.3E-07       | 1.6E-04 | 1.0E-04     | 1.8E-05 | 8.3E-03       | 2.6E-02 | 58.9     | 79.8          | 65.7     | 87.9     | 51.7     | 320.6    | 462.5    | 330.1    | 218.6    | 241.2    | 304.9                      | No       | Yes      | No         | No                                                              | nup85 Nucleoporin family protein, expressed                                                   |                                          |
| Os. 41214.1.S1_at       | LOC_Os01g54450 | 3       | 1.3E-06       | 3.7E-03 | 1.9E-03     | 4.0E-05 | 7.3E-02       | 1.5E-01 | 146.2    | 77.4          | 157.7    | 106.7    | 16.3     | 122.7    | 566.6    | 463.9    | 540.8    | 366.2    | 253.5                      | 307.5    | No       | No         | No                                                              | nuclear protein, putative, expressed                                                          |                                          |
| OsAffx. 21616.1.S1_x_at | LOC_Os01g54890 | 4       | 3.0E-06       | 1.2E-08 | 2.1E-04     | 7.3E-05 | 1.5E-05       | 4.0E-02 | 12442.6  | 13973.9       | 14264.9  | 5210.1   | 5230     | 7589.7   | 10085.2  | 10166.4  | 5001     | 4715.2   | 5484.2                     | No       | No       | No         | ethylene-responsive transcription factor 2, putative, expressed |                                                                                               |                                          |
| Os. 37620.1.S1_at       | LOC_Os01g55820 | 5       | 5.2E-06       | 2.9E-05 | 7.7E-04     | 1.1E-04 | 2.6E-03       | 9.1E-02 | 131.2    | 87.4          | 105.4    | 320.8    | 294.9    | 355.9    | 66.5     | 71.2     | 92.8     | 239.5    | 188                        | 196.9    | No       | No         | No                                                              | glucan endo-1,3-beta-glucosidase 1 precursor, putative, expressed                             |                                          |
| Os. 29865.1.S1_at       | LOC_Os01g56070 | 4       | 1.8E-06       | 5.5E-04 | 5.0E-06     | 2.0E-02 | 3.5E-03       | 1.0E-02 | 1107.9   | 1397.8        | 1419.4   | 464      | 4        | 8.8      | 110.7    | 60.3     | 108.6    | 3.5      | 40.7                       | 12.8     | Yes      | Yes        | No                                                              | cytochrome P450 72A1, putative, expressed                                                     |                                          |
| OsAffx. 11629.1.S1_at   | LOC_Os01g56890 | 5       | 3.1E-09       | 4.9E-04 | 1.1E-04     | 4.7E-07 | 1.6E-02       | 6.6E-02 | 385.1    | 337.3         | 308.2    | 173.5    | 207.7    | 219.8    | 30.2     | 45       | 59.1     | 85.6     | 62.3                       | 31.5     | No       | No         | No                                                              | expressed protein                                                                             |                                          |
| OsAffx. 11631.1.S1_x_at | LOC_Os01g57066 | 6       | 3.8E-07       | 2.2E-06 | 4.8E-04     | 1.7E-05 | 4.5E-04       | 6.8E-02 | 3324     | 3077.7        | 2942.2   | 1712.6   | 1538.3   | 1723.3   | 1096.7   | 1052.6   | 1178.3   | 842.7    | 800.9                      | 872.6    | No       | No         | No                                                              | transmembrane protein 49, putative, expressed                                                 |                                          |
| Os. 26729.1.S1_at       | LOC_Os01g57073 | 3       | 1.1E-06       | 3.2E-06 | 6.2E-04     | 3.4E-05 | 5.8E-04       | 8.0E-02 | 3513.6   | 4497.2        | 3560.7   | 1790     | 2516.5   | 2150.1   | 2167     | 2591.4   | 2358.8   | 1547.5   | 1828.6                     | 1795.3   | No       | Yes        | Yes                                                             | insulin-degrading enzyme, putative, expressed                                                 |                                          |
| Os. 9073.1.S1_at        | LOC_Os01g57470 | 4       | 4.0E-06       | 1.6E-05 | 3.9E-05     | 9.0E-05 | 1.8E-03       | 1.3E-02 | 554.4    | 479.3         | 690.7    | 162.6    | 205.7    | 208.4    | 260.3    | 240.3    | 146.3    | 173.2    | 59                         | 149.9    | Yes      | No         | Yes                                                             | caltractin, putative, expressed                                                               |                                          |
| Os. 30258.1.S1_at       | LOC_Os01g58240 | 9       | 4.7E-09       | 5.0E-06 | 1.2E-05     | 9.3E-07 | 7.7E-04       | 6.3E-03 | 1171.2   | 1733.2        | 1462.2   | 564.8    | 736.3    | 300.2    | 20.3     | 33       | 6.8      | 11.8     | 4                          |          |          |            |                                                                 |                                                                                               |                                          |

| Probe Set ID            | Locus ID       | probe # | ANOVA p-value |         |         |         | FDR q-value |         |          |          | Nipponbare MW |          |          | Nipponbare CK |          |          | 93-11 MW |          |          | 93-11 CK |          |      | Indel (Indica vs Japonica) |                                                                                     |                                  | Annotation |
|-------------------------|----------------|---------|---------------|---------|---------|---------|-------------|---------|----------|----------|---------------|----------|----------|---------------|----------|----------|----------|----------|----------|----------|----------|------|----------------------------|-------------------------------------------------------------------------------------|----------------------------------|------------|
|                         |                |         | C             |         | C x T   | C       |             | C x T   | Report 1 | Report 2 | Report 3      | Report 1 | Report 2 | Report 3      | Report 1 | Report 2 | Report 3 | Report 1 | Report 2 | Report 3 | upstream | gene | downstream                 |                                                                                     |                                  |            |
|                         |                |         | A             | T       |         | A       | T           |         |          |          |               |          |          |               |          |          |          |          |          |          |          |      | Yes                        | No                                                                                  | Yes                              |            |
| Os. 11995.1.S1_at       | LOC_Os02g07160 | 3       | 1.1E-03       | 4.4E-07 | 3.8E-04 | 6.4E-03 | 1.5E-04     | 5.9E-02 | 2821.3   | 2868.9   | 1679.2        | 1402.8   | 1590.1   | 1176.9        | 1442.7   | 1798.4   | 1270.8   | 985.1    | 1414.7   | 894.5    | No       | Yes  | No                         | 4-hydroxyphenylpyruvate dioxygenase, putative, expressed                            | g11 protein, putative, expressed |            |
| Os. 4769.1.S1_at        | LOC_Os02g08230 | 3       | 6.4E-05       | 7.7E-03 | 1.0E-03 | 7.3E-04 | 4.1E-04     | 1.0E-01 | 870.1    | 523.9    | 662.4         | 882.3    | 560.2    | 1200.1        | 1209.6   | 1217.3   | 665.4    | 850.2    | 883.9    | No       | No       | No   | No                         |                                                                                     |                                  |            |
| Os. 53919.1.S1_at       | LOC_Os02g09220 | 4       | 3.3E-07       | 7.9E-04 | 9.6E-04 | 2.0E-07 | 2.5E-02     | 1.0E-01 | 9181.8   | 10935.2  | 11652.6       | 13900.9  | 15182.5  | 15038.8       | 6        | 43.4     | 43.2     | 234.9    | 76.5     | 27.2     | Yes      | Yes  | Yes                        | cytochrome P450 71B8, putative, expressed                                           |                                  |            |
| Os. 25128.1.S1_at       | LOC_Os02g09810 | 8       | 4.0E-05       | 2.0E-08 | 2.1E-05 | 5.1E-04 | 2.2E-05     | 9.2E-03 | 3345.3   | 2895.1   | 3765.5        | 1369.7   | 1310.4   | 1639.6        | 2343.2   | 2339.8   | 2266.3   | 1421.4   | 1301.4   | 1431.7   | No       | No   | No                         | amino acid transporter-like protein, putative, expressed                            |                                  |            |
| OsAffx. 11997.1.S1_at   | LOC_Os02g12070 | 8       | 2.0E-07       | 1.4E-05 | 1.6E-05 | 1.1E-05 | 1.6E-03     | 7.2E-03 | 426.1    | 372.8    | 401.9         | 176.7    | 201.3    | 176.2         | 62.5     | 70.9     | 63.1     | 91       | 63       | 78.2     | Yes      | No   | No                         | expressed protein                                                                   |                                  |            |
| Os. 20204.2.S1_s_at     | LOC_Os02g12350 | 4       | 1.0E-07       | 9.5E-07 | 1.4E-06 | 1.6E-06 | 2.5E-04     | 1.6E-03 | 330.3    | 412.2    | 375.6         | 107.8    | 147.9    | 84.3          | 90       | 125.1    | 170.8    | 42.8     | 46.6     | 30.2     | Yes      | Yes  | Yes                        | histone deacetylase, putative, expressed                                            |                                  |            |
| Os. 20204.1.S1_s_at     | LOC_Os02g12380 | 10      | 6.3E-09       | 4.9E-09 | 2.8E-07 | 1.1E-06 | 1.3E-05     | 5.7E-04 | 703.2    | 648.1    | 588.7         | 126.9    | 166.4    | 139.2         | 128.8    | 149.1    | 17.4     | 12.6     | 4.7      | 7.2      | No       | Yes  | Yes                        | histone deacetylase, putative, expressed                                            |                                  |            |
| Os. 20204.1.S1_s_at     | LOC_Os02g12380 | 9       | 3.7E-06       | 5.3E-06 | 7.6E-05 | 8.4E-05 | 8.1E-04     | 2.1E-02 | 52.6     | 49.6     | 52            | 38.5     | 56.4     | 26.2          | 16.5     | 47.8     | 13.7     | 20.7     | 12.1     | 33.3     | No       | No   | No                         | histone deacetylase, putative, expressed                                            |                                  |            |
| Os. 20204.3.S1_s_at     | LOC_Os02g12380 | 11      | 1.0E-09       | 3.4E-08 | 3.6E-08 | 3.8E-07 | 3.0E-05     | 1.6E-04 | 1015.9   | 1018     | 918.5         | 175.4    | 285.8    | 305.9         | 3.1      | 16.5     | 15.5     | 1.9      | 4.4      | 3.7      | No       | Yes  | Yes                        | histone deacetylase, putative, expressed                                            |                                  |            |
| Os. 57132.1.S1_at       | LOC_Os02g12900 | 5       | 5.4E-11       | 6.6E-09 | 6.6E-09 | 7.0E-08 | 1.1E-05     | 5.4E-05 | 1604.6   | 1970.6   | 1666.6        | 608.6    | 424.4    | 660.5         | 825.6    | 869      | 219.8    | 335.8    | No       | No       | Yes      | Yes  | Yes                        | cysteine synthase, putative, expressed                                              |                                  |            |
| Os. 20931.1.S1_s_at     | LOC_Os02g13300 | 3       | 1.2E-03       | 4.4E-07 | 4.4E-05 | 7.0E-03 | 1.5E-04     | 1.4E-02 | 1562.8   | 1782.3   | 1316.5        | 660      | 716.3    | 565.1         | 1001.4   | 1160.6   | 966.6    | 841.3    | 765.3    | 765.3    | Yes      | Yes  | No                         | Grave disease carrier protein, putative, expressed                                  |                                  |            |
| OsAffx. 2594.1.S1_at    | LOC_Os02g13300 | 3       | 1.9E-03       | 5.3E-07 | 1.3E-04 | 9.9E-03 | 1.7E-04     | 2.9E-02 | 1263.2   | 1092.9   | 1165.2        | 523.3    | 471.3    | 384.6         | 749.2    | 875.2    | 848.7    | 525.1    | 626.3    | 632.2    | Yes      | Yes  | No                         | Grave disease carrier protein, putative, expressed                                  |                                  |            |
| Os. 4170.1.S1_at        | LOC_Os02g13380 | 10      | 1.1E-08       | 1.1E-08 | 4.1E-07 | 1.6E-06 | 1.5E-05     | 7.2E-04 | 10617.5  | 8658.1   | 9774.7        | 4514.6   | 3724.3   | 4251          | 4439.2   | 3849.2   | 4568.9   | 3178.6   | 2685.4   | 2977.2   | Yes      | No   | No                         | early nodulin 93, putative, expressed                                               |                                  |            |
| OsAffx. 24234.2.S1_s_at | LOC_Os02g13990 | 5       | 1.6E-06       | 2.5E-06 | 1.4E-05 | 4.6E-05 | 4.9E-04     | 6.9E-03 | 122.9    | 156.7    | 94.4          | 21.4     | 28.7     | 43.5          | 48.3     | 34.9     | 40.1     | 9.8      | 31.8     | 24.7     | No       | No   | No                         | receptor-like protein kinase precursor, putative                                    |                                  |            |
| Os. 11467.1.S1_at       | LOC_Os02g13840 | 9       | 2.7E-06       | 1.8E-07 | 4.5E-05 | 6.7E-05 | 8.8E-05     | 1.5E-02 | 4592     | 10538.6  | 10360.7       | 6947.7   | 5729.2   | 6410.1        | 7917.9   | 7548.2   | 7656     | 6041.9   | 6173.3   | 6375.9   | No       | No   | No                         | citrate synthase, glyoxysomal precursor, putative, expressed                        |                                  |            |
| Os. 54037.1.S1_s_at     | LOC_Os02g15700 | 4       | 1.7E-09       | 2.9E-04 | 1.1E-05 | 5.0E-07 | 1.3E-02     | 6.0E-03 | 9040     | 9576.9   | 8815.7        | 5643.6   | 6237.2   | 5986.3        | 2884.5   | 4165.1   | 3628.5   | 5437.9   | 5129.2   | 5928.3   | Yes      | No   | Yes                        | expressed protein                                                                   |                                  |            |
| Os. 53610.1.S1_at       | LOC_Os02g16270 | 4       | 1.0E-09       | 1.3E-05 | 2.3E-05 | 3.7E-07 | 1.5E-03     | 6.0E-03 | 592.7    | 652.1    | 577.2         | 354.7    | 417.9    | 8.9           | 8.2      | 349.1    | 5.7      | 5.4      | 34.6     | Yes      | Yes      | Yes  | Yes                        | xal-like protein, putative, expressed                                               |                                  |            |
| OsAffx. 24284.4.S1_x_at | LOC_Os02g16780 | 4       | 4.3E-04       | 5.8E-05 | 6.3E-04 | 3.2E-03 | 4.2E-03     | 8.0E-02 | 18.6     | 30.4     | 24.9          | 101.6    | 80.8     | 81.8          | 7.2      | 32.6     | 57.3     | 322.5    | 245.5    | 212.4    | No       | No   | No                         | alpha-expansin 1 precursor, putative, expressed                                     |                                  |            |
| OsAffx. 24284.5.S1_x_at | LOC_Os02g16839 | 5       | 8.3E-05       | 1.4E-04 | 2.2E-05 | 8.9E-04 | 7.6E-03     | 9.4E-03 | 37.5     | 15.5     | 14.2          | 22.6     | 14.2     | 7.8           | 16.4     | 14.6     | 6.8      | 383.7    | 196      | 153.9    | No       | No   | No                         | alpha-expansin 3 precursor, putative                                                |                                  |            |
| Os. 8089.1.S1_at        | LOC_Os02g17240 | 4       | 2.4E-06       | 2.5E-08 | 1.1E-06 | 6.2E-05 | 2.4E-05     | 1.4E-03 | 51       | 29.4     | 24.8          | 67.8     | 300.7    | 110.1         | 45.4     | 21.6     | 26.8     | 152      | 158.2    | 161.1    | No       | No   | No                         | pollen-specific kinase partner protein, putative, expressed                         |                                  |            |
| Os. 9729.1.S1_s_at      | LOC_Os02g17390 | 4       | 1.1E-05       | 8.5E-07 | 1.1E-04 | 1.9E-04 | 4E-04       | 2.7E-02 | 13927.2  | 14467    | 13743.5       | 9636.4   | 8101.8   | 8814.8        | 10753.2  | 10052.1  | 10699.3  | 9226.8   | 8237     | 9255.9   | No       | No   | No                         | peroxisomal fatty acid beta-oxidation multifunctional protein, putative, expressed  |                                  |            |
| OsAffx. 12089.1.S1_at   | LOC_Os02g17620 | 3       | 5.6E-07       | 5.8E-04 | 7.1E-04 | 2.2E-05 | 2.0E-02     | 8.7E-02 | 702.4    | 591.2    | 795.2         | 1835.3   | 1061.6   | 1799.7        | 7.1      | 10       | 4.5      | 41.4     | 29.6     | 7.5      | No       | Yes  | Yes                        | expressed protein                                                                   |                                  |            |
| Os. 53610.1.S1_at       | LOC_Os02g17800 | 3       | 3.8E-05       | 6.8E-07 | 4.0E-05 | 4.9E-04 | 2.0E-04     | 1.4E-02 | 65.5     | 32.5     | 34.8          | 547.3    | 310.7    | 366           | 44.8     | 48.7     | 57.2     | 1288.6   | 676      | 1241.5   | No       | Yes  | No                         | xyloglucan endotransglucosylase/hydrolase protein 26 precursor, putative            |                                  |            |
| OsAffx. 24297.1.S1_at   | LOC_Os02g17900 | 8       | 1.1E-08       | 3.9E-09 | 1.1E-08 | 1.6E-06 | 8.2E-06     | 7.4E-05 | 16.8     | 6        | 9.2           | 141.1    | 63.9     | 99.9          | 46       | 3.5      | 12.3     | 399.7    | 329.1    | 399.7    | No       | No   | No                         | xyloglucan endotransglucosylase/hydrolase protein 26 precursor, putative, expressed |                                  |            |
| Os. 5314.1.S1_at        | LOC_Os02g19770 | 7       | 2.7E-05       | 7.6E-06 | 1.2E-04 | 3.8E-04 | 1.0E-03     | 2.7E-02 | 3581.7   | 3399.3   | 3752.3        | 1878.4   | 1674.1   | 2256          | 2151.6   | 1958.1   | 2468.6   | 1648.3   | 1285.8   | 1722.7   | No       | No   | Yes                        | eukaryotic translation initiation factor 1A, putative, expressed                    |                                  |            |
| Os. 57017.1.S1_at       | LOC_Os02g20790 | 4       | 1.3E-08       | 5.0E-04 | 3.2E-04 | 1.8E-06 | 1.8E-02     | 5.2E-02 | 526.5    | 416.9    | 468.9         | 66.6     | 759.2    | 61.9          | 55.2     | 42.9     | 68.8     | 65       | 49.9     | 57.9     | No       | No   | Yes                        | reticulon family protein, expressed                                                 |                                  |            |
| OsAffx. 2707.1.S1_at    | LOC_Os02g21300 | 11      | 3.8E-06       | 6.0E-09 | 1.9E-06 | 8.7E-05 | 1.0E-03     | 1.9E-03 | 6383.5   | 4218.7   | 5018.8        | 108.6    | 96.9     | 70.4          | 1896.5   | 1665.8   | 2174.7   | 258.7    | 137.2    | 231.3    | Yes      | No   | No                         | transposon protein, putative, unclassified, expressed                               |                                  |            |
| Os. 27095.1.A1_at       | LOC_Os02g21460 | 9       | 2.1E-07       | 8.9E-07 | 2.4E-05 | 1.1E-05 | 2.4E-04     | 1.0E-02 | 7433.3   | 9038.1   | 7109.7        | 3964.7   | 4221.8   | 3568.9        | 3371.6   | 3595.5   | 3055.7   | 2463.1   | 2655.8   | 2250.5   | Yes      | No   | No                         | glutathione S-transferase, C-terminal-like, putative, expressed                     |                                  |            |
| Os. 49731.1.S1_at       | LOC_Os02g21920 | 4       | 7.6E-05       | 1.3E-06 | 2.9E-04 | 8.3E-04 | 3.1E-04     | 5.5E-02 | 4475.7   | 4000     | 3711.9        | 1768.4   | 2087.6   | 1681          | 2940.8   | 2784.5   | 2565     | 1795.3   | 2070     | 1697.9   | No       | No   | Yes                        | sensescence-associated protein, putative, expressed                                 |                                  |            |
| OsAffx. 24292.1.S1_at   | LOC_Os02g21920 | 4       | 1.5E-05       | 1.2E-06 | 1.8E-04 | 2.4E-04 | 2.9E-04     | 3.6E-02 | 5488     | 5626.2   | 6189.8        | 1686.4   | 1679.8   | 1869          | 2915.6   | 3223.1   | 3076.1   | 2065.7   | 1883.4   | 2523.8   | No       | No   | No                         | sensescence-associated protein, putative, expressed                                 |                                  |            |
| Os. 8901.1.S1_s_at      | LOC_Os02g22130 | 3       | 3.3E-06       | 1.2E-05 | 1.0E-03 | 7.8E-05 | 1.5E-03     | 1.1E-01 | 3083.7   | 2829.6   | 3033.3        | 1712.6   | 1735     | 1577.7        | 1366.3   | 1577.7   | 1366.3   | 1577.7   | 1366.3   | 1577.7   | No       | No   | Yes                        | GTPase activating protein, putative, expressed                                      |                                  |            |
| Os. 8901.1.S2_at        | LOC_Os02g22130 | 6       | 1.5E-08       | 2.3E-07 | 1.0E-04 | 1.9E-06 | 1.0E-04     | 2.5E-02 | 8216.5   | 9129.4   | 8962.8        | 5417.3   | 5978.1   | 6410.4        | 5814.5   | 5504.1   | 5211     | 5191.9   | 4489.1   | 4250.7   | No       | No   | Yes                        | GTPase activating protein, putative, expressed                                      |                                  |            |
| Os. 53176.1.S1_at       | LOC_Os02g28720 | 9       | 1.1E-05       | 1.7E-06 | 5.1E-06 | 8.0E-05 | 3.7E-04     | 3.5E-03 | 159.2    | 114.9    | 139.1         | 49.2     | 56.8     | 30.7          | 58.9     | 51.9     | 47.1     | 34.7     | 57.5     | 22.3     | No       | No   | No                         | inositol-tetrakisphosphate 1-kinase 1, putative, expressed                          |                                  |            |
| Os. 8902.1.S1_at        | LOC_Os02g28820 | 8       | 7.4E-09       | 9.2E-07 | 8.0E-07 | 1.2E-06 | 2.5E-04     | 1.1E-03 | 451.9    | 409      | 437           | 234.5    | 234.5    | 156.9         | 18.7     | 75.9     | 6.4      | 68.4     | 44.7     | 40.9     | Yes      | Yes  | Yes                        | transferrase, putative, expressed                                                   |                                  |            |
| Os. 14042.1.S1_at       | LOC_Os02g30470 | 7       | 1.3E-09       | 1.0E-04 | 1.1E-04 | 4.4E-07 | 6.1E-03     | 2.7E-02 | 1.8      | 17.2     | 2.2           | 21.8     | 50.1     | 58.8          | 2425.5   | 1922.8   | 2093.9   | 3968     | 3147.8   | 3112.3   | Yes      | Yes  | Yes                        | expressed protein                                                                   |                                  |            |
| Os. 9326.1.S1_at        | LOC_Os02g30470 | 4       | 4.7E-10       | 7.7E-05 | 1.5E-04 | 4.2E-07 | 5.1E-03     | 3.2E-02 | 2706.2   | 2990     | 3066.6        | 3837.4   | 3492.9   | 3865.4        | 51.1     | 75.8     | 47.8     |          |          |          |          |      |                            |                                                                                     |                                  |            |

| Probe Set ID           | Locus ID       | probe # | ANOVA p-value |         | FDR q-value |         | Nipponbare MW |         |          | Nipponbare CK |          |          | 93-11 MW |          |          | 93-11 CK |          |          | Indel (Indica vs Japonica) |          | Annotation |          |                                                     |                                                                                    |                                                 |
|------------------------|----------------|---------|---------------|---------|-------------|---------|---------------|---------|----------|---------------|----------|----------|----------|----------|----------|----------|----------|----------|----------------------------|----------|------------|----------|-----------------------------------------------------|------------------------------------------------------------------------------------|-------------------------------------------------|
|                        |                |         | C             | T       | CxT         | C       | T             | CxT     | Repeat 1 | Repeat 2      | Repeat 3 | Repeat 1 | Repeat 2 | Repeat 3 | Repeat 1 | Repeat 2 | Repeat 3 | Repeat 1 | Repeat 2                   | Repeat 3 |            | upstream | downstream                                          |                                                                                    |                                                 |
| Os_12391.1.S1_s_at     | LOC_Os02g54820 | 3       | 1.1E-07       | 9.6E-06 | 1.8E-04     | 7.2E-06 | 1.2E-03       | 3.7E-02 | 4778.3   | 5577.7        | 5519.6   | 2339.5   | 3501.6   | 2957     | 3263.9   | 3451.3   | 3275.9   | 2617.3   | 2556.1                     | 2041.6   | Yes        | No       | trehalose-6-phosphate synthase, putative, expressed |                                                                                    |                                                 |
| OsAffx.12645.1.S1_at   | LOC_Os02g54870 | 4       | 7.0E-08       | 2.4E-04 | 1.0E-05     | 5.3E-06 | 1.1E-02       | 2.5E-02 | 15.1     | 9.4           | 8        | 7.6      | 29       | 4.6      | 252.5    | 251.3    | 338.7    | 106.2    | 200.4                      | 155.5    | No         | No       | expressed protein                                   |                                                                                    |                                                 |
| OsAffx.12645.1.S1_s_at | LOC_Os02g54870 | 9       | 2.5E-08       | 1.7E-04 | 8.4E-05     | 2.7E-06 | 8.6E-03       | 2.2E-02 | 265.8    | 335.5         | 324.9    | 416      | 541.5    | 417.3    | 3331.5   | 3364.7   | 3682.1   | 1527.6   | 2619.3                     | 1978.9   | No         | No       | expressed protein                                   |                                                                                    |                                                 |
| Os_41432.1.S1_at       | LOC_Os02g54880 | 5       | 2.7E-05       | 1.4E-03 | 4.2E-04     | 3.7E-04 | 3.7E-02       | 6.2E-02 | 363.2    | 394.4         | 591.6    | 408.3    | 403.9    | 623      | 1085.5   | 1210.4   | 1249.5   | 407.9    | 600.6                      | 732.4    | No         | No       | cytochrome c oxidase subunit, putative              |                                                                                    |                                                 |
| Os_53968.1.S1_at       | LOC_Os02g56310 | 10      | 9.2E-10       | 6.7E-07 | 1.4E-06     | 3.5E-07 | 2.0E-04       | 1.6E-03 | 3737.5   | 4732.1        | 3692     | 1883.3   | 1731.9   | 1818.5   | 832.4    | 1532.3   | 1717.4   | 807.7    | 908.3                      | 1128.7   | Yes        | No       | Yes                                                 | calcium-dependent protein kinase, isoform AK1, putative, expressed                 |                                                 |
| Os_29925.1.S1_at       | LOC_Os02g56440 | 3       | 8.5E-10       | 2.9E-03 | 3.0E-03     | 4.4E-07 | 6.2E-02       | 2.0E-01 | 775      | 790.6         | 677.7    | 604      | 598.8    | 603.9    | 28.8     | 51.9     | 23       | 33.3     | 52.8                       | 24.9     | Yes        | Yes      | Yes                                                 | expressed protein                                                                  |                                                 |
| Os_20154.1.S1_at       | LOC_Os02g56700 | 3       | 1.1E-09       | 1.7E-09 | 2.1E-05     | 4.0E-07 | 4.9E-06       | 2.4E-05 | 567.8    | 1146.8        | 911.1    | 4.9      | 145.8    | 137.3    | 257.2    | 242.4    | 308.1    | 5.5      | 6.9                        | 4.6      | Yes        | Yes      | Yes                                                 | dihydroflavonol-4-reductase, putative, expressed                                   |                                                 |
| Os_4154.1.S1_at        | LOC_Os02g56850 | 10      | 2.3E-06       | 6.5E-07 | 1.0E-05     | 6.0E-05 | 2.0E-04       | 5.6E-03 | 917.1    | 8560.5        | 9245.8   | 4793.8   | 3852.3   | 4767     | 5019.6   | 4350.6   | 5668.3   | 4340.3   | 3969.3                     | 4704.6   | No         | No       | No                                                  | glutathione reductase, cytosolic, putative, expressed                              |                                                 |
| Os_8733.1.S1_at        | LOC_Os02g57260 | 9       | 5.5E-07       | 3.1E-07 | 5.5E-04     | 2.1E-05 | 1.2E-04       | 7.4E-02 | 10875.6  | 10216.4       | 11052.1  | 7031.4   | 6073     | 7019.9   | 7782.4   | 7368.8   | 8132.9   | 6564.8   | 5305.2                     | 6370.5   | No         | Yes      | No                                                  | 3-ketocyl-CoA thiolase 2, peroxisomal precursor, putative, expressed               |                                                 |
| Os_55392.1.S1_at       | LOC_Os02g57350 | 3       | 9.0E-07       | 3.0E-03 | 2.5E-03     | 3.0E-05 | 6.3E-02       | 1.8E-01 | 510.3    | 511           | 622.2    | 293.3    | 285.6    | 348.9    | 6        | 6.8      | 10.9     | 3.9      | 3                          | 6.3      | Yes        | Yes      | Yes                                                 | expressed protein                                                                  |                                                 |
| Os_9312.1.S1_at        | LOC_Os03g01270 | 3       | 4.9E-05       | 3.6E-05 | 4.1E-03     | 5.9E-04 | 3.0E-03       | 2.4E-01 | 6569.1   | 7196          | 7724.8   | 11869.6  | 10135.6  | 11662    | 12213.8  | 11210.13 | 11305    | 13532.6  | 12860.9                    | 12512    | No         | No       | No                                                  | beta-expansin I precursor, putative, expressed                                     |                                                 |
| Os_9346.1.S1_at        | LOC_Os03g01310 | 4       | 8.5E-11       | 1.1E-07 | 1.2E-04     | 9.0E-08 | 6.4E-05       | 2.8E-02 | 1880.6   | 2730.3        | 2419.6   | 8072.1   | 5425.1   | 5600.6   | 7184.1   | 883.9    | 8090     | 1382.5   | 14156.5                    | 14782.9  | No         | No       | No                                                  | cortical cell-delineating protein precursor, putative, expressed                   |                                                 |
| Os_40007.1.S1_s_at     | LOC_Os03g02874 | 10      | 4.6E-07       | 1.3E-06 | 1.3E-06     | 1.9E-05 | 3.2E-04       | 1.5E-03 | 588.4    | 712.2         | 647.4    | 85.1     | 145.6    | 84.9     | 31.7     | 47.9     | 34.9     | 27.3     | 54.4                       | 31.2     | No         | No       | No                                                  | retrotransposon protein, putative, Ty3-gypsy subclass, expressed                   |                                                 |
| Os_26406.1.S1_at       | LOC_Os03g03450 | 5       | 8.7E-09       | 1.1E-06 | 5.0E-06     | 1.4E-06 | 2.7E-04       | 3.5E-03 | 3617.6   | 3573.5        | 2865.5   | 1276.6   | 1552     | 1481.7   | 833.9    | 1378     | 1107.5   | 693      | 804.5                      | 967.9    | Yes        | No       | No                                                  | anthranilate phosphoribosyltransferase, chloroplast precursor, putative, expressed |                                                 |
| Os_26406.2.S1_s_at     | LOC_Os03g03450 | 9       | 5.4E-08       | 5.0E-07 | 3.7E-05     | 4.4E-06 | 1.7E-04       | 1.3E-02 | 2337.2   | 2142.2        | 1962.3   | 1058     | 1086.8   | 920.3    | 840.1    | 945.2    | 692.8    | 490.4    | 603                        | 354.9    | Yes        | No       | No                                                  | anthranilate phosphoribosyltransferase, chloroplast precursor, putative, expressed |                                                 |
| Os_49527.1.S1_at       | LOC_Os03g03790 | 4       | 3.8E-07       | 1.9E-08 | 2.1E-05     | 1.7E-05 | 2.1E-05       | 9.1E-03 | 2154.3   | 1686.3        | 2338.1   | 735.1    | 729.3    | 930.8    | 1069.3   | 806.0    | 967.5    | 449.3    | 599.5                      | 452.1    | No         | No       | No                                                  | acyl-activating enzyme 11, putative, expressed                                     |                                                 |
| Os_7192.1.S1_at        | LOC_Os03g04410 | 8       | 6.6E-07       | 4.7E-08 | 2.2E-04     | 2.4E-05 | 3.6E-05       | 4.1E-02 | 11211.5  | 11364         | 10793.7  | 6510     | 5474.1   | 6376.1   | 9158.1   | 8964.7   | 8249.2   | 6750.5   | 6231.3                     | 6349.6   | Yes        | No       | Yes                                                 | aconitate hydratase, cytoplasmic, putative, expressed                              |                                                 |
| Os_56054.1.S1_at       | LOC_Os03g05700 | 11      | 3.1E-09       | 1.7E-09 | 3.6E-09     | 9.2E-07 | 4.9E-06       | 3.5E-05 | 4242     | 4050.6        | 4238.2   | 139.6    | 146      | 178.4    | 421.4    | 422      | 392.8    | 104.7    | 125.1                      | 114.5    | No         | No       | No                                                  | expressed protein                                                                  |                                                 |
| Os_8947.1.S1_at        | LOC_Os03g05910 | 11      | 4.6E-09       | 1.6E-10 | 7.6E-09     | 9.2E-07 | 1.6E-06       | 5.9E-05 | 10256    | 11076         | 10310.8  | 554.5    | 603.7    | 486.7    | 3897     | 3889.4   | 4817.3   | 550.9    | 499.1                      | 360.2    | No         | No       | No                                                  | monooxygenase, putative, expressed                                                 |                                                 |
| Os_4891.1.S1_at        | LOC_Os03g06200 | 4       | 7.5E-06       | 6.1E-06 | 1.2E-03     | 1.4E-04 | 8.9E-04       | 1.2E-01 | 8786.2   | 9824.8        | 9310.4   | 5031.7   | 4790.5   | 5241.5   | 5680.5   | 5854.4   | 5568.7   | 4462.3   | 4075.5                     | 3744.9   | No         | No       | No                                                  | phosphoserine aminotransferase, chloroplast precursor, putative, expressed         |                                                 |
| Os_51791.1.S1_at       | LOC_Os03g06970 | 6       | 1.1E-06       | 5.0E-06 | 4.6E-06     | 3.6E-05 | 7.8E-04       | 3.3E-03 | 327.5    | 283.8         | 283.5    | 167.4    | 140.2    | 86.6     | 67.2     | 98.1     | 72       | 55       | 48                         | 48       | No         | No       | No                                                  | pollenless3, putative, expressed                                                   |                                                 |
| Os_10356.1.S1_at       | LOC_Os03g08320 | 10      | 2.3E-06       | 1.0E-06 | 7.6E-06     | 5.9E-05 | 2.7E-04       | 9.4E-03 | 5050.6   | 5052.4        | 5224.8   | 1669     | 1260.8   | 1475.5   | 1551.8   | 1965     | 1807.1   | 1564.5   | 1029.2                     | 1277.1   | No         | No       | No                                                  | pH1.2, putative, expressed                                                         |                                                 |
| OsAffx.12780.1.S1_at   | LOC_Os03g08410 | 2       | 2.8E-07       | 4.5E-06 | 3.7E-06     | 1.3E-05 | 7.3E-04       | 2.9E-03 | 144.4    | 115.1         | 125.1    | 48.1     | 55.4     | 70.9     | 24.5     | 11.8     | 7        | 19.8     | 74.1                       | 41.4     | Yes        | No       | No                                                  | monooxygenase/oxidoreductase, putative, expressed                                  |                                                 |
| OsAffx.12783.1.S1_at   | LOC_Os03g08530 | 7       | 9.2E-06       | 1.2E-06 | 3.4E-06     | 1.7E-04 | 3.0E-04       | 1.2E-02 | 475.8    | 468.9         | 462.2    | 121.9    | 105.1    | 91.4     | 160.4    | 300.7    | 250.4    | 106.9    | 151.4                      | 151.6    | Yes        | No       | Yes                                                 | Yes                                                                                | alanine aminotransferase 2, putative, expressed |
| Os_32298.1.S1_at       | LOC_Os03g08880 | 4       | 1.2E-06       | 4.7E-05 | 6.3E-04     | 3.8E-05 | 3.6E-03       | 8.1E-02 | 516.4    | 887.1         | 649.5    | 378      | 424.9    | 360.4    | 147.5    | 117.1    | 175.1    | 130.8    | 104                        | 70.1     | No         | No       | No                                                  | ATP13, putative, expressed                                                         |                                                 |
| Os_43892.1.S1_at       | LOC_Os03g09070 | 3       | 1.4E-05       | 1.6E-07 | 1.9E-05     | 2.2E-04 | 8.1E-05       | 8.5E-03 | 238.8    | 244.9         | 321.1    | 49.6     | 88.9     | 19.9     | 141.6    | 93.1     | 38.2     | 86.2     | 6.5                        | No       | No         | No       | No                                                  | protein binding protein, putative, expressed                                       |                                                 |
| Os_20151.1.S1_at       | LOC_Os03g09990 | 9       | 9.7E-08       | 1.7E-04 | 2.4E-03     | 6.5E-06 | 8.6E-03       | 1.8E-01 | 6493.2   | 5607.5        | 7144.8   | 4688.1   | 4682.2   | 5461.3   | 3750.8   | 3733.3   | 3446.7   | 3301.3   | 2952                       | 3099.3   | Yes        | No       | Yes                                                 | Yes                                                                                | membrane protein, putative, expressed           |
| Os_49776.1.S1_at       | LOC_Os03g09910 | 10      | 1.0E-06       | 5.1E-06 | 1.6E-05     | 3.3E-05 | 7.9E-04       | 7.7E-03 | 1444.5   | 1459.3        | 1409.3   | 333      | 350.3    | 362.4    | 120.8    | 143.6    | 138.2    | 70.3     | 132.3                      | 85.9     | No         | No       | No                                                  | transaminase/transferase, transferring nitrogenous groups, putative, expressed     |                                                 |
| Os_9086.1.S1_at        | LOC_Os03g10210 | 3       | 2.2E-04       | 4.5E-04 | 1.6E-03     | 1.9E-03 | 1.7E-02       | 1.4E-01 | 527.4    | 500.9         | 464.3    | 187.3    | 362.1    | 331.2    | 462.7    | 501      | 495.3    | 418      | 346                        | 346      | Yes        | No       | No                                                  | DNA binding protein, putative, expressed                                           |                                                 |
| Os_15799.1.S1_at       | LOC_Os03g11420 | 8       | 2.4E-06       | 1.2E-08 | 1.2E-05     | 6.1E-05 | 1.5E-05       | 6.4E-03 | 1382.6   | 1272.8        | 1465.7   | 3550.3   | 2877.9   | 3375.7   | 1337     | 1215.7   | 1431.3   | 2246     | 2009.3                     | 2271.7   | No         | No       | No                                                  | non-cyanogenic beta-glucosidase precursor, putative, expressed                     |                                                 |
| Os_7678.1.S1_at        | LOC_Os03g12500 | 5       | 3.6E-10       | 1.2E-07 | 3.7E-07     | 2.1E-07 | 6.6E-05       | 6.7E-04 | 614.9    | 739.7         | 713.6    | 353      | 309.8    | 333.4    | 517.5    | 148.7    | 203.9    | 131.5    | 106.1                      | 88.4     | Yes        | No       | Yes                                                 | Yes                                                                                | cytochrome P450 74A2, putative, expressed       |
| Os_8741.1.S1_at        | LOC_Os03g12820 | 11      | 1.6E-06       | 2.6E-09 | 1.9E-06     | 4.5E-05 | 6.4E-06       | 1.9E-03 | 2135.8   | 1714.9        | 1840     | 270.1    | 353.7    | 299.7    | 988.2    | 1148.3   | 918.9    | 277.5    | 305.3                      | 223.4    | No         | No       | No                                                  | ATP8, putative, expressed                                                          |                                                 |
| Os_50391.1.S1_at       | LOC_Os03g13030 | 4       | 7.5E-06       | 4.3E-08 | 2.6E-04     | 5.5E-06 | 3.4E-05       | 4.6E-02 | 1677.5   | 1924.7        | 1659.2   | 969.2    | 662.2    | 834.2    | 1051.2   | 1173.9   | 484.5    | 528.6    | 589                        | No       | No         | No       | No                                                  | 1-O-acetylcholine synthase precursor, putative, expressed                          |                                                 |
| Os_12191.1.S1_at       | LOC_Os03g13140 | 5       | 3.7E-05       | 6.4E-04 | 3.2E-03     | 4.8E-04 | 8.4E-03       | 2.1E-01 | 979.3    | 1388.9        | 1239.4   | 403.8    | 614.2    | 614.5    | 333.6    | 428.9    | 407.2    | 351.3    | 159.5                      | 230.8    | No         | No       | No                                                  | non-symbiotic hemoglobin 2, putative, expressed                                    |                                                 |
| Os_12191.1.S1_s_at     | LOC_Os03g13140 | 3       | 6.2E-05       | 3.1E-04 | 1.1E-03     | 7.1E-04 | 1.3E-02       | 1.1E-01 | 734.8    | 927.8         | 1110.6   | 390.3    | 573.4    | 609.6    | 353.5    | 321.4    | 404.7    | 348.1    | 193.8                      | 254.9    | No         | No       | No                                                  | non-symbiotic hemoglobin 2, putative, expressed                                    |                                                 |
| Os_159.1.S1_s_at       | LOC_Os03g13210 | 2       | 2.5E-04       | 1.1E-04 | 7.3E-03     | 6.1E-03 | 6.5E-03       | 3.2E-01 | 1307     | 1245.7        | 1102.5   | 72.2     | 882.6    | 607.6    | 788      | 885.6    | 916.9    | 677.4    | 648.1                      | 609.5    | No         | No       | No                                                  | No                                                                                 | peroxidase N precursor, putative, expressed     |
| Os_49217.1.S1_at       | LOC_Os03g14300 | 5       | 1.3E-05       | 8.5E-05 | 5.1E-05     | 2.2E-04 | 5.4E-03</     |         |          |               |          |          |          |          |          |          |          |          |                            |          |            |          |                                                     |                                                                                    |                                                 |

| Probe Set ID           | Locus ID       | probe # | ANOVA p-value |         |         | FDR q-value |         |         | Nipponbare MW |          |          | Nipponbare R2 |          |          | 93-11 MW |          |          | 93-11 R2 |          |          | Indel (Indica vs Japonica) |      | Annotation |                                                                                       |                                                                                    |
|------------------------|----------------|---------|---------------|---------|---------|-------------|---------|---------|---------------|----------|----------|---------------|----------|----------|----------|----------|----------|----------|----------|----------|----------------------------|------|------------|---------------------------------------------------------------------------------------|------------------------------------------------------------------------------------|
|                        |                |         | C             | T       | CxT     | C           | T       | CxT     | Repeat 1      | Repeat 2 | Repeat 3 | Repeat 1      | Repeat 2 | Repeat 3 | Repeat 1 | Repeat 2 | Repeat 3 | Repeat 1 | Repeat 2 | Repeat 3 | upstream                   | gene |            | downstream                                                                            |                                                                                    |
|                        |                |         |               |         |         |             |         |         |               |          |          |               |          |          |          |          |          |          |          |          |                            |      |            |                                                                                       |                                                                                    |
| Os_46743.1.S1_x_at     | LOC_Os03g53660 | 5       | 2.1E-04       | 2.1E-05 | 5.8E-04 | 1.8E-03     | 2.1E-03 | 7.7E-02 | 300.1         | 269.2    | 220      | 367.3         | 427.1    | 371.7    | 281.7    | 286.6    | 352.5    | 1023.6   | 722.4    | 822.2    | No                         | No   | Yes        | XIF, putative, expressed                                                              |                                                                                    |
| Os_51517.1.S1_at       | LOC_Os03g55010 | 11      | 1.4E-09       | 4.9E-11 | 1.5E-09 | 4.5E-07     | 8.5E-07 | 2.0E-05 | 2066.2        | 2478.5   | 2078.8   | 91.8          | 64.4     | 69       | 558.4    | 678.5    | 552.5    | 43.9     | 38.1     | 9.4      | No                         | No   | No         | cytokinin-O-glucosyltransferase 2, putative, expressed                                |                                                                                    |
| Os_11216.1.S1_at       | LOC_Os03g55090 | 6       | 1.8E-05       | 1.7E-04 | 4.8E-04 | 2.8E-04     | 8.7E-03 | 6.8E-02 | 524.1         | 466      | 386.6    | 470.4         | 453.3    | 309.8    | 706.2    | 754.5    | 838.7    | 543.7    | 482.2    | 467.5    | No                         | No   | No         | alpha-1,4 glucan phosphorylase, I isozyme, chloroplast precursor, putative, expressed |                                                                                    |
| Os_2898.1.S1_at        | LOC_Os03g55164 | 4       | 1.2E-05       | 5.3E-07 | 7.2E-06 | 2.1E-04     | 1.7E-04 | 4.5E-03 | 9.3           | 9.6      | 8.4      | 11.5          | 8.1      | 2.7      | 2.8      | 4.3      | 9.6      | 94       | 14.8     | 128.2    | No                         | Yes  | No         | OsWRKY4 - Superfamily of rice TFs having WRKY and zinc finger domains, expressed      |                                                                                    |
| OsAffx.13491.1.S1_at   | LOC_Os03g55180 | 4       | 1.4E-04       | 1.4E-04 | 2.3E-04 | 1.1E-03     | 3.3E-03 | 2.5E-02 | 352.3         | 371.9    | 339.7    | 414.7         | 316.1    | 372.4    | 298.2    | 347.6    | 349.9    | 598.8    | 610.4    | 708.8    | Yes                        | No   | No         | expressed protein                                                                     |                                                                                    |
| OsAffx.25717.1.S1_at   | LOC_Os03g55210 | 8       | 1.2E-06       | 3.2E-07 | 1.0E-06 | 3.7E-05     | 1.3E-04 | 1.3E-03 | 62.1          | 43.2     | 48.1     | 122.9         | 9.7      | 67.5     | 55.7     | 32.7     | 41.9     | 258.7    | 280.5    | 201.7    | No                         | Yes  | No         | protein kinase, putative, expressed                                                   |                                                                                    |
| Os_11193.1.S1_at       | LOC_Os03g55240 | 11      | 1.4E-07       | 1.5E-09 | 8.9E-08 | 8.6E-06     | 4.5E-06 | 2.8E-04 | 10559.1       | 11622.2  | 11637.2  | 519.2         | 556.1    | 630.7    | 3789.7   | 3759.4   | 4245.3   | 1104.8   | 1138.7   | 743      | No                         | Yes  | Yes        | cytochrome P450 8I1, putative, expressed                                              |                                                                                    |
| Os_17985.1.S1_at       | LOC_Os03g56000 | 6       | 1.8E-07       | 7.7E-08 | 6.5E-05 | 1.6E-05     | 1.9E-02 | 794.9   | 852.7         | 863.1    | 259.4    | 304.3         | 292.3    | 185.5    | 306.2    | 226.2    | 65.5     | 69.8     | 74.8     | No       | No                         | No   | No         | expressed protein                                                                     |                                                                                    |
| Os_5581.1.S1_at        | LOC_Os03g56540 | 9       | 6.4E-07       | 2.6E-10 | 8.2E-07 | 2.4E-05     | 1.8E-06 | 1.1E-03 | 5998.3        | 1475.9   | 5610.7   | 1007.4        | 713.9    | 1048.7   | 3038     | 3043.9   | 2658.2   | 689.7    | 698.8    | 815.5    | No                         | No   | No         | No                                                                                    | mitochondrial import inner membrane translocase subunit TIM14, putative, expressed |
| Os_22397.1.S1_at       | LOC_Os03g56860 | 3       | 1.1E-03       | 3.7E-06 | 5.0E-04 | 6.5E-03     | 6.4E-04 | 6.9E-02 | 2212.7        | 402.9    | 1243.8   | 640.7         | 453.7    | 438.8    | 640.7    | 575.8    | 458.5    | 308.5    | 445.7    | No       | No                         | No   | No         | expressed protein                                                                     |                                                                                    |
| Os_2820.1.S1_x_at      | LOC_Os03g56900 | 4       | 2.4E-06       | 4.2E-07 | 3.1E-04 | 6.2E-05     | 1.5E-04 | 5.1E-02 | 1276.6        | 1167.2   | 1277.5   | 1998.2        | 1522.3   | 1872.6   | 1714.7   | 1536.4   | 1526.2   | 3067.9   | 2456.2   | 2618.7   | No                         | No   | No         | No                                                                                    | seed maturation protein, putative, expressed                                       |
| Os_12200.1.S1_at       | LOC_Os03g57200 | 7       | 4.1E-07       | 4.2E-05 | 1.1E-05 | 1.8E-05     | 3.3E-03 | 7.2E-03 | 6975.2        | 7675.7   | 8603     | 3424.1        | 2242.4   | 1599.4   | 1582.5   | 2322.1   | 2524.4   | 2042.6   | 1925.5   | Yes      | Yes                        | No   | No         | glutathione S-transferase parâ, putative, expressed                                   |                                                                                    |
| Os_46765.1.S1_x_at     | LOC_Os03g57580 | 3       | 7.5E-08       | 1.6E-04 | 2.5E-03 | 5.5E-06     | 8.5E-03 | 1.8E-01 | 807           | 581.2    | 604.1    | 520.5         | 590.7    | 411.7    | 229.1    | 232.7    | 308.9    | 241.7    | 193.5    | 220.4    | No                         | No   | No         | No                                                                                    | expressed protein                                                                  |
| Os_54936.1.S1_at       | LOC_Os03g57640 | 9       | 1.0E-06       | 2.9E-09 | 2.4E-06 | 3.3E-05     | 6.8E-06 | 2.7E-02 | 2415          | 2258.8   | 242.9    | 243.6         | 276.4    | 246.1    | 1086.4   | 1063.9   | 927.8    | 136      | 225.7    | 188.5    | No                         | No   | No         | No                                                                                    | gibberellin receptor GID12, putative, expressed                                    |
| Os_26768.1.S1_at       | LOC_Os03g58010 | 8       | 4.2E-06       | 9.2E-08 | 1.3E-05 | 9.4E-05     | 5.7E-05 | 6.9E-03 | 2996.1        | 3448.6   | 3063.8   | 589.8         | 577.5    | 434.4    | 1165.6   | 1858.6   | 1299.5   | 416.3    | 437.8    | 385.5    | No                         | No   | No         | No                                                                                    | N-acetyltransferase, putative, expressed                                           |
| Os_10884.1.S1_at       | LOC_Os03g58790 | 3       | 4.6E-08       | 2.7E-07 | 7.1E-04 | 4.0E-06     | 2.3E-05 | 8.5E-03 | 6175.8        | 6048.8   | 6371.3   | 2360.7        | 2893     | 2712.5   | 3447.9   | 4802.2   | 4120.8   | 1342.1   | 1587.1   | 1613.3   | No                         | Yes  | Yes        | Yes                                                                                   | ATPase 3, putative, expressed                                                      |
| OsAffx.25764.1.S1_at   | LOC_Os03g59110 | 3       | 1.0E-05       | 7.2E-07 | 1.4E-05 | 1.8E-04     | 2.2E-04 | 7.2E-03 | 65.7          | 33.1     | 32       | 156.2         | 97       | 34.6     | 72.9     | 34.6     | 237      | 255.6    | 315.6    | 209.6    | No                         | No   | No         | No                                                                                    | phosphoribide a oxygenase, chloroplast precursor, putative, expressed              |
| Os_10146.1.S1_at       | LOC_Os03g59320 | 4       | 7.1E-05       | 1.8E-06 | 6.3E-05 | 7.9E-04     | 4.0E-04 | 1.8E-02 | 4163.2        | 4061     | 3829.5   | 1982.9        | 2127     | 1931.6   | 4163.4   | 3914.1   | 4797.9   | 3371.6   | 3776.6   | 3448.4   | No                         | No   | No         | No                                                                                    | expressed protein                                                                  |
| Os_52136.1.S1_at       | LOC_Os03g59430 | 3       | 4.4E-07       | 2.6E-05 | 9.3E-04 | 1.9E-05     | 2.4E-03 | 1.0E-01 | 140.3         | 175.5    | 118.9    | 291.7         | 194.6    | 291.9    | 218.6    | 295.4    | 202.9    | 444      | 314.7    | 470      | Yes                        | No   | No         | No                                                                                    | stachyose synthase precursor, putative, expressed                                  |
| OsAffx.25777.1.S1_at   | LOC_Os03g59880 | 3       | 3.8E-07       | 5.6E-04 | 1.3E-03 | 1.7E-05     | 2.0E-02 | 1.2E-01 | 282           | 325.9    | 287.1    | 160.2         | 197.6    | 169.1    | 8.2      | 10.9     | 2.2      | 42.4     | 30.2     | 1.3      | No                         | No   | No         | No                                                                                    | expressed protein                                                                  |
| Os_10845.1.S1_x_at     | LOC_Os03g60370 | 10      | 9.1E-08       | 1.1E-05 | 9.0E-06 | 6.3E-06     | 1.3E-02 | 5.2E-02 | 2646          | 2888.5   | 2984.2   | 1592.8        | 1365.1   | 1599.4   | 1371.3   | 1282.7   | 1416.5   | 1400.8   | 1276.5   | 1222.9   | Yes                        | No   | No         | No                                                                                    | acid phosphatase, putative, expressed                                              |
| Os_15874.1.A1_at       | LOC_Os03g60570 | 5       | 8.6E-04       | 5.1E-09 | 3.1E-04 | 5.4E-03     | 9.6E-06 | 5.1E-02 | 740.7         | 61       | 695.2    | 66.9          | 119.6    | 147      | 304.8    | 465.7    | 469.6    | 194.2    | 47.3     | 85.8     | No                         | No   | No         | No                                                                                    | zinc finger DNA-binding protein, putative, expressed                               |
| Os_39973.1.S1_x_at     | LOC_Os03g60580 | 4       | 4.2E-05       | 2.8E-06 | 1.5E-05 | 5.3E-04     | 5.4E-04 | 7.3E-03 | 3304.5        | 3715.3   | 3748     | 1104.4        | 831.2    | 876.4    | 1635.2   | 2038.9   | 1763.2   | 1123.2   | 1711.6   | 1495.2   | No                         | No   | No         | No                                                                                    | actin-depolymerizing factor 4, putative, expressed                                 |
| Os_30886.1.S1_at       | LOC_Os03g61360 | 5       | 1.9E-08       | 4.3E-04 | 1.4E-04 | 2.3E-06     | 1.7E-02 | 3.1E-02 | 3190.3        | 3731.3   | 3587.3   | 2327.1        | 2111.4   | 2248.9   | 1072.5   | 2658.9   | 2248.2   | 1687.9   | 2051.7   | 2511.9   | Yes                        | Yes  | Yes        | Yes                                                                                   | epoxide hydrolase 2, putative, expressed                                           |
| OsAffx.22650.2.S1_at   | LOC_Os03g61470 | 4       | 4.1E-04       | 2.3E-04 | 3.9E-04 | 3.0E-03     | 1.1E-02 | 5.9E-02 | 130.9         | 97.2     | 100.8    | 477.2         | 253.3    | 338.4    | 76.4     | 55.1     | 72.5     | 279.9    | 182.7    | 188.2    | No                         | No   | No         | No                                                                                    | PGPS/D12, putative, expressed                                                      |
| Os_34488.1.S1_at       | LOC_Os03g61590 | 8       | 7.4E-07       | 3.0E-08 | 1.7E-06 | 2.6E-05     | 2.7E-03 | 1.7E-03 | 143.1         | 121.5    | 198.1    | 808.5         | 598.6    | 675.2    | 161.9    | 183.2    | 231.3    | 2166.9   | 1979.6   | 188.2    | No                         | No   | No         | No                                                                                    | expressed protein                                                                  |
| Os_10435.1.S1_at       | LOC_Os03g62060 | 5       | 8.7E-04       | 3.3E-06 | 4.5E-04 | 5.5E-03     | 1.0E-04 | 6.5E-02 | 957.4         | 1010.2   | 1063.8   | 3175.8        | 683.9    | 705.4    | 800.8    | 705.4    | 4764.9   | 5799.8   | 4350.8   | Yes      | No                         | No   | No         | IAA-amino acid hydrolase ILR1 precursor, putative, expressed                          |                                                                                    |
| Os_52796.2.S1_x_at     | LOC_Os03g62200 | 3       | 2.3E-04       | 1.4E-06 | 2.9E-04 | 1.9E-03     | 3.2E-04 | 4.9E-02 | 451.9         | 761.8    | 596.7    | 737.8         | 1000.6   | 737.7    | 329.3    | 459.6    | 446.1    | 748.6    | 942.9    | 792.5    | Yes                        | Yes  | Yes        | Yes                                                                                   | ammonium transporter 2, putative, expressed                                        |
| Os_49388.1.S1_at       | LOC_Os03g62430 | 8       | 4.4E-09       | 6.4E-07 | 8.0E-07 | 8.9E-07     | 2.0E-04 | 1.1E-03 | 359.6         | 332.4    | 120.9    | 149.3         | 150.7    | 77       | 63.8     | 53.5     | 33       | 39.3     | 12.4     | Yes      | No                         | Yes  | Yes        | OsWAK28 - OsWAK receptor-like protein kinase, expressed                               |                                                                                    |
| Os_23021.1.S1_at       | LOC_Os03g62480 | 4       | 4.7E-12       | 4.2E-11 | 4.8E-11 | 2.2E-08     | 8.5E-07 | 2.7E-06 | 3549.4        | 3883.2   | 3694.2   | 450.4         | 408.4    | 373.8    | 109.7    | 286.1    | 140.2    | 69.7     | 67.6     | 48.4     | No                         | No   | No         | Yes                                                                                   | anthocyanidin 5,3-O-glucosyltransferase, putative, expressed                       |
| Os_10849.1.S1_at       | LOC_Os03g62490 | 5       | 1.2E-09       | 2.5E-07 | 2.5E-07 | 4.2E-07     | 1.1E-04 | 5.4E-04 | 1094.3        | 1101.8   | 1116.9   | 360.9         | 409.7    | 481.2    | 398.8    | 419.4    | 374.5    | 152.4    | 149      | 161.9    | Yes                        | No   | No         | No                                                                                    | mitochondrial prohibitin complex protein 2, putative, expressed                    |
| OsAffx.10400.1.S1_x_at | LOC_Os03g62974 | 6       | 6.7E-07       | 1.1E-08 | 1.6E-06 | 2.5E-05     | 1.5E-05 | 1.7E-03 | 587.9         | 474.8    | 469      | 188           | 192.5    | 109.8    | 320.9    | 344.6    | 335.5    | 153      | 132.9    | 164.4    | Yes                        | Yes  | No         | No                                                                                    | hypothetical protein                                                               |
| Os_56016.1.S1_at       | LOC_Os03g63220 | 10      | 1.0E-07       | 8.9E-07 | 2.8E-06 | 6.8E-06     | 2.4E-04 | 2.4E-03 | 1970.5        | 1496.6   | 1741     | 1085.4        | 112.6    | 409.4    | 104.5    | 67.4     | 18.2     | 43.8     | 32.3     | Yes      | No                         | No   | No         | glutamyl-tRNA, putative, expressed                                                    |                                                                                    |
| Os_56144.1.S1_at       | LOC_Os03g64260 | 4       | 4.0E-07       | 1.4E-07 | 4.5E-07 | 1.7E-05     | 7.2E-05 | 7.7E-04 | 286           | 230.2    | 179.2    | 38.9          | 21       | 27.3     | 130.1    | 106.3    | 113.1    | 113.3    | 10.3     | 10.4     | No                         | No   | No         | No                                                                                    | ethylene responsive element binding protein, putative, expressed                   |
| Os_53673.1.S1_at       | LOC_Os04g01310 | 7       | 4.2E-06       | 8.6E-06 | 4.9E-06 | 9.4E-05     | 1.1E-03 | 3.4E-03 | 449.3         | 426.8    | 498.3    | 316.5         | 174.7    | 132.5    | 62.1     | 67.4     | 55.3     | 68.4     | 71.2     | 61.6     | Yes                        | No   | No         | No                                                                                    | serine/threonine-protein kinase receptor precursor, putative, expressed            |
| Os_52423.1.S1_at       | LOC_Os04g01674 | 3       | 7.1E-09       | 3.5E-03 | 5.2E-03 | 5.0E-07     | 6.9E-02 | 2.7E-01 | 1340.8        | 1489.3   | 1529.4   | 1667.8        | 1759.7   | 1781.3   | 307.7    | 334.4    | 350.3    | 204.6    | 264.7    | 265.5    | Yes                        | No   | No         | No                                                                                    | glyoxylate reductase, putative, expressed                                          |
| Os_18856.1.S1_at       | LOC_Os04g0205  |         |               |         |         |             |         |         |               |          |          |               |          |          |          |          |          |          |          |          |                            |      |            |                                                                                       |                                                                                    |

| Probe Set ID           | Locus ID       | probe # | ANOVA p-value |         |         | FDR q-value |         |         | Nipponbare MW |          |          | Nipponbare CX |          |          | 93-11 MW |          |          | 93-11 CX |          |          | Indel (Indica vs Japonica) |          |          | Annotation |          |                                          |                                                                                  |
|------------------------|----------------|---------|---------------|---------|---------|-------------|---------|---------|---------------|----------|----------|---------------|----------|----------|----------|----------|----------|----------|----------|----------|----------------------------|----------|----------|------------|----------|------------------------------------------|----------------------------------------------------------------------------------|
|                        |                |         | C             | T       | CxT     | C           | T       | CxT     | Repeat 1      | Repeat 2 | Repeat 3 | Repeat 1      | Repeat 2 | Repeat 3 | Repeat 1 | Repeat 2 | Repeat 3 | Repeat 1 | Repeat 2 | Repeat 3 | Repeat 1                   | Repeat 2 | Repeat 3 |            | upstream | gene                                     | downstream                                                                       |
|                        |                |         |               |         |         |             |         |         |               |          |          |               |          |          |          |          |          |          |          |          |                            |          |          |            |          |                                          |                                                                                  |
| Os.7806.1.S1_at        | LOC_Os04g39980 | 3       | 5.7E-06       | 9.2E-07 | 3.5E-04 | 1.2E-04     | 2.5E-04 | 5.6E-02 | 2861.9        | 2829     | 3464.8   | 1457.1        | 671.3    | 1242.7   | 890.6    | 1640.1   | 2018.2   | 773.5    | 922.2    | 915.4    | Yes                        | No       | No       |            |          |                                          | gibberellin 20 oxidase 2, putative, expressed                                    |
| Os.9293.1.S1_at        | LOC_Os04g40040 | 4       | 2.9E-08       | 3.4E-07 | 2.6E-05 | 2.9E-06     | 1.3E-04 | 1.1E-02 | 5220.9        | 4429.9   | 8106.5   | 8102.2        | 6626.9   | 354.3    | 354.3    | 2811.8   | 3546.6   | 4629.3   | 4381.1   | 5302.3   | Yes                        | Yes      | Yes      | Yes        |          |                                          | copper methylene oxidase precursor, putative, expressed                          |
| Os.23932.1.A1_at       | LOC_Os04g40140 | 5       | 6.6E-07       | 2.5E-05 | 4.4E-04 | 2.4E-05     | 2.3E-03 | 6.4E-02 | 250.3         | 149.9    | 146.6    | 149.1         | 116.5    | 155.9    | 390.9    | 667.4    | 537.7    | 287.4    | 297.6    | 299.6    | No                         | No       | No       | No         |          |                                          | expressed protein                                                                |
| Os.16333.1.S1_at       | LOC_Os04g40310 | 4       | 3.9E-04       | 1.4E-06 | 3.0E-04 | 3.0E-03     | 3.2E-04 | 5.0E-02 | 5527.8        | 6236.9   | 5131.4   | 2796.5        | 2753.9   | 2819.4   | 3900.4   | 4242.1   | 3876.5   | 3129.6   | 3241.2   | 3180.2   | No                         | No       | No       | No         |          |                                          | isocitrate dehydrogenase subunit 1, mitochondrial precursor, putative, expressed |
| Os.52574.1.S1_at       | LOC_Os04g41150 | 10      | 4.1E-08       | 6.5E-09 | 2.9E-07 | 3.7E-06     | 1.1E-05 | 5.8E-04 | 168.4         | 131.4    | 163.9    | 744           | 315.1    | 527      | 323.4    | 349.2    | 385.2    | 1752.5   | 1983.9   | 1788.8   | No                         | No       | No       | No         |          |                                          | TGF-beta receptor, type I/II extracellular region, putative, expressed           |
| Os.52574.2.S1_x_at     | LOC_Os04g41150 | 9       | 7.3E-06       | 1.6E-06 | 3.1E-05 | 1.4E-04     | 3.6E-04 | 1.2E-02 | 79.3          | 107.8    | 101.5    | 339.5         | 116.9    | 216      | 152.3    | 113.2    | 175      | 825.1    | 643.7    | 781.2    | No                         | No       | No       | No         |          |                                          | TGF-beta receptor, type I/II extracellular region, putative, expressed           |
| Os.53077.1.S1_at       | LOC_Os04g42760 | 4       | 4.2E-05       | 2.9E-05 | 1.5E-04 | 5.3E-04     | 2.6E-03 | 3.3E-02 | 61.5          | 128.7    | 85.9     | 184.2         | 96.1     | 94.5     | 63.8     | 99.1     | 100.2    | 431.2    | 374.4    | 246.2    | No                         | No       | No       | No         |          |                                          | sialyltransferase-like protein, putative, expressed                              |
| Os.53286.1.S1_at       | LOC_Os04g43800 | 10      | 4.3E-07       | 8.5E-08 | 2.3E-06 | 1.8E-05     | 2.1E-03 | 4.9E-02 | 4587          | 7234.9   | 6395.2   | 995.9         | 323.5    | 1529.1   | 2013.9   | 2492     | 1522.2   | 780.9    | 799.2    | 753      | No                         | No       | No       | No         |          |                                          | phenylalanine ammonia-lyase, putative, expressed                                 |
| Os.10860.2.S1_at       | LOC_Os04g44320 | 4       | 2.9E-03       | 1.1E-06 | 9.8E-05 | 1.4E-02     | 2.8E-04 | 2.5E-02 | 1912.2        | 2019.9   | 2093.7   | 2433.8        | 2194.9   | 2908.1   | 1777.8   | 1959.7   | 1941     | 3720.6   | 3679.4   | 3706.4   | No                         | No       | No       | No         |          |                                          | transposon protein, putative, unclassified, expressed                            |
| Os.12986.1.S1_at       | LOC_Os04g44500 | 3       | 1.7E-03       | 5.2E-03 | 1.9E-05 | 9.0E-03     | 9.0E-02 | 8.6E-03 | 2283.4        | 2359.7   | 2224.8   | 384.4         | 1954     | 1874     | 1763     | 1859.3   | 1802.7   | 3484.4   | 3011.7   | 3630.9   | Yes                        | No       | No       | No         |          |                                          | PI3P, putative, expressed                                                        |
| Os.19361.1.S2_at       | LOC_Os04g45290 | 3       | 6.9E-04       | 6.1E-05 | 2.9E-03 | 4.6E-03     | 4.3E-03 | 2.0E-01 | 2145.8        | 2602.8   | 2967.7   | 2943          | 2907.5   | 3005.9   | 3032.6   | 3298     | 2388.1   | 5201.5   | 5139.9   | 4786     | No                         | Yes      | Yes      | Yes        |          |                                          | beta-fructofuranosidase 1 precursor, putative, expressed                         |
| Os.30193.1.S1_at       | LOC_Os04g46250 | 4       | 3.4E-07       | 3.8E-07 | 8.5E-07 | 1.5E-05     | 1.4E-04 | 1.1E-03 | 30.3          | 6.9      | 30.1     | 69.5          | 40.8     | 11.2     | 40.5     | 30.2     | 163.8    | 126.7    | 144.5    | No       | No                         | No       | No       |            |          | AP2 domain containing protein, expressed |                                                                                  |
| Os.47380.1.S1_at       | LOC_Os04g46810 | 3       | 6.7E-04       | 3.6E-10 | 1.2E-03 | 4.4E-03     | 2.2E-06 | 1.2E-01 | 246.2         | 193      | 745.9    | 6908.6        | 5485.9   | 8799.5   | 495      | 693.2    | 501.1    | 11181.2  | 7554     | 8635.3   | No                         | No       | No       | No         |          |                                          | cortical cell-delineating protein precursor, putative, expressed                 |
| OsAffx.26492.1.S1_at   | LOC_Os04g46830 | 3       | 3.6E-03       | 7.0E-03 | 6.3E-03 | 1.6E-02     | 1.1E-01 | 3.0E-02 | 3346.6        | 2159.9   | 3745.1   | 3075.5        | 2437.6   | 3187.4   | 9373.6   | 5245.9   | 6547.4   | 3345.4   | 2899.8   | 3496.5   | Yes                        | No       | No       | No         |          |                                          | cortical cell-delineating protein precursor, putative, expressed                 |
| OsAffx.26492.1.S1_s_at | LOC_Os04g46830 | 9       | 3.1E-04       | 9.2E-04 | 8.5E-04 | 2.4E-02     | 2.8E-02 | 9.7E-02 | 6622.5        | 5271.9   | 8519.7   | 6475.4        | 6508.4   | 8192.9   | 16432.6  | 12511.6  | 14070.9  | 8192.9   | 7306     | 10460.7  | Yes                        | No       | No       | No         |          |                                          | cortical cell-delineating protein precursor, putative, expressed                 |
| Os.23440.1.A1_at       | LOC_Os04g46910 | 8       | 2.7E-08       | 9.1E-10 | 3.6E-08 | 2.8E-06     | 1.6E-04 | 1.6E-04 | 4.3           | 8.6      | 43.5     | 192.2         | 159.7    | 139.3    | 41       | 76.8     | 69.7     | 587.5    | 425.4    | 455.1    | No                         | No       | No       | No         |          |                                          | actin-depolymerizing factor, putative, expressed                                 |
| Os.49838.1.S1_at       | LOC_Os04g47720 | 9       | 4.7E-09       | 3.4E-08 | 9.5E-08 | 9.3E-07     | 3.0E-05 | 2.5E-03 | 533.5         | 616.9    | 564.6    | 168.7         | 140.1    | 143.7    | 98       | 135      | 100.4    | 25.3     | 37.6     | 83       | No                         | Yes      | Yes      | Yes        |          |                                          | Sis-zeatin 0-glucosyltransferase, putative, expressed                            |
| Os.49507.1.S1_at       | LOC_Os04g48850 | 4       | 9.5E-05       | 1.2E-06 | 1.2E-05 | 9.9E-04     | 2.9E-04 | 6.2E-03 | 535.8         | 482.2    | 485.9    | 143.9         | 137.5    | 153      | 286.8    | 295.8    | 330.8    | 262.7    | 217.2    | 200.4    | No                         | No       | No       | No         |          |                                          | l-aminocyclopropane-1-carboxylate synthase, putative, expressed                  |
| Os.7095.1.S1_at        | LOC_Os04g49210 | 8       | 6.0E-08       | 1.0E-06 | 2.2E-05 | 5.8E-06     | 2.7E-04 | 9.3E-03 | 1500          | 1802     | 1755.5   | 1157.6        | 1278.7   | 1194.7   | 5362.8   | 4835.6   | 5104.6   | 2131.5   | 2754.7   | 2671.4   | Yes                        | Yes      | Yes      | Yes        |          |                                          | naringenin, 2-oxoglutarate 3-dioxygenase, putative, expressed                    |
| Os.5335.1.S1_at        | LOC_Os04g49450 | 4       | 4.7E-09       | 2.4E-07 | 2.9E-05 | 9.4E-07     | 1.1E-04 | 1.1E-02 | 595.3         | 665.7    | 589.9    | 452.8         | 517.2    | 445.1    | 266.7    | 272.6    | 248.9    | 165.1    | 287.1    | 247.1    | No                         | No       | No       | No         |          |                                          | expressed protein                                                                |
| Os.54481.2.S1_at       | LOC_Os04g49460 | 6       | 3.2E-05       | 2.6E-06 | 5.0E-04 | 4.3E-04     | 5.1E-04 | 7.0E-02 | 438.3         | 504.5    | 539.8    | 164.6         | 207.7    | 194.7    | 213.5    | 243.8    | 284.4    | 127.4    | 124.9    | 203.9    | No                         | No       | No       | No         |          |                                          | ATP binding protein, putative, expressed                                         |
| Os.27657.1.A1_at       | LOC_Os04g49890 | 3       | 3.1E-06       | 2.1E-08 | 2.6E-05 | 7.4E-05     | 2.2E-05 | 1.1E-02 | 5106.9        | 570.7    | 3894.7   | 451.7         | 1095.9   | 1084.8   | 2030.2   | 2734.1   | 2512.9   | 586.8    | 714.3    | 581.5    | No                         | No       | No       | No         |          |                                          | ABC transporter family protein, expressed                                        |
| Os.5562.1.S1_at        | LOC_Os04g51150 | 9       | 5.6E-06       | 1.8E-10 | 6.3E-06 | 1.1E-04     | 1.6E-06 | 9.1E-02 | 9871.4        | 10367.2  | 9541.8   | 1046.7        | 941.6    | 83.2     | 6519.6   | 7777.8   | 5996.5   | 1171.1   | 930.8    | 804.9    | No                         | Yes      | Yes      | Yes        |          |                                          | transposon protein, putative, unclassified, expressed                            |
| Os.3406.1.S1_at        | LOC_Os04g51160 | 11      | 2.9E-07       | 2.2E-10 | 5.7E-07 | 1.4E-05     | 1.7E-06 | 9.0E-04 | 11153.7       | 11557.9  | 12694.4  | 925.0         | 810.5    | 1124.3   | 4194     | 4984.6   | 4349.8   | 839.4    | 438.8    | 573.2    | No                         | No       | No       | No         |          |                                          | transposon protein, putative, unclassified, expressed                            |
| OsAffx.13041.1.S1_x_at | LOC_Os04g51420 | 4       | 6.3E-10       | 1.8E-07 | 3.2E-07 | 2.8E-07     | 8.5E-05 | 6.2E-04 | 287.6         | 372.2    | 168.9    | 218.9         | 142.9    | 78.7     | 82.3     | 93.4     | 137.8    | 83.8     | 52.3     | 77.3     | No                         | No       | No       | No         |          |                                          | transposon protein, putative, unclassified                                       |
| Os.9554.1.S1_at        | LOC_Os04g52504 | 7       | 3.0E-05       | 9.6E-06 | 4.4E-05 | 1.1E-03     | 1.2E-03 | 1.4E-02 | 6247.5        | 6416.8   | 6712.9   | 3084.4        | 2517.6   | 3478.5   | 3416.5   | 3550     | 3501     | 3214.6   | 2921.9   | 3704.7   | No                         | No       | No       | No         |          |                                          | adhesin/proline-rich protein, putative, expressed                                |
| Os.55628.1.S1_at       | LOC_Os04g53060 | 8       | 2.1E-06       | 3.7E-09 | 1.9E-06 | 5.5E-05     | 7.9E-06 | 1.9E-03 | 1129.3        | 1166.5   | 1316.1   | 25.8          | 35.4     | 52       | 43.5     | 689.6    | 638.4    | 39.4     | 64.2     | 53.7     | No                         | Yes      | Yes      | Yes        |          |                                          | expressed protein                                                                |
| OsAffx.26671.1.S1_x_at | LOC_Os04g53612 | 4       | 3.8E-04       | 2.6E-08 | 2.1E-04 | 2.9E-03     | 2.5E-05 | 4.0E-02 | 90.6          | 76.5     | 106      | 3.7           | 5.9      | 2.4      | 5.2      | 66.9     | 14.5     | 2.7      | 3.2      | 3.6      | No                         | No       | No       | No         |          |                                          | expressed protein                                                                |
| Os.15825.1.S1_at       | LOC_Os04g53720 | 4       | 2.8E-07       | 3.2E-05 | 1.7E-05 | 1.3E-05     | 2.8E-03 | 7.9E-03 | 307.3         | 251      | 192.9    | 139.2         | 117.1    | 88       | 54       | 9.8      | 39       | 37.7     | 46       | 64.7     | Yes                        | Yes      | Yes      | Yes        |          |                                          | ATP binding protein, putative, expressed                                         |
| Os.15825.1.S2_at       | LOC_Os04g53720 | 6       | 4.1E-07       | 6.9E-05 | 8.6E-05 | 1.8E-05     | 4.7E-03 | 2.2E-02 | 755.7         | 615.8    | 531.8    | 261           | 388      | 408.8    | 54       | 44.7     | 52.6     | 24.9     | 56.1     | 32.1     | Yes                        | No       | No       | No         |          |                                          | ATP binding protein, putative, expressed                                         |
| Os.11471.1.S1_at       | LOC_Os04g54610 | 7       | 4.4E-03       | 1.0E-03 |         |             |         |         |               |          |          |               |          |          |          |          |          |          |          |          |                            |          |          |            |          |                                          |                                                                                  |

| Probe Set ID           | Locus ID       | probe # | ANOVA p-value |         |         | FDR q-value |         |         | Nipponbare MW |          |          | Nipponbare CK |          |          | 93-11 MW |          |          | 93-11 CK |          |          | Indel (Indica vs Japonica) |            | Annotation |                                                                                  |
|------------------------|----------------|---------|---------------|---------|---------|-------------|---------|---------|---------------|----------|----------|---------------|----------|----------|----------|----------|----------|----------|----------|----------|----------------------------|------------|------------|----------------------------------------------------------------------------------|
|                        |                |         | C             | T       | CxT     | C           | T       | CxT     | Repeat 1      | Repeat 2 | Repeat 3 | Repeat 1      | Repeat 2 | Repeat 3 | Repeat 1 | Repeat 2 | Repeat 3 | Repeat 1 | Repeat 2 | Repeat 3 | upstream                   | downstream |            |                                                                                  |
|                        |                |         |               |         |         |             |         |         |               |          |          |               |          |          |          |          |          |          |          |          |                            |            |            |                                                                                  |
| Os_49683.1.S1_at       | LOC_Os05g38770 | 4       | 5.8E-08       | 9.0E-09 | 6.3E-08 | 4.7E-06     | 1.3E-05 | 2.2E-04 | 5.5           | 42.7     | 16.4     | 99.7          | 45.1     | 54.2     | 28.4     | 33.1     | 36.9     | 115.5    | 145      | 126      | Yes                        | Yes        | Yes        | protein kinase APK18, chloroplast precursor, putative, expressed                 |
| OsAffx.15031.1.S1_at   | LOC_Os05g38860 | 3       | 2.8E-05       | 1.2E-05 | 3.6E-04 | 3.9E-04     | 1.4E-03 | 5.6E-02 | 369.9         | 282      | 298      | 152.2         | 122.2    | 115.4    | 140.1    | 95.2     | 150.4    | 99.8     | 95.1     | 141.7    | No                         | No         | No         | expressed protein                                                                |
| Os_8150.1.S1_a_at      | LOC_Os05g42350 | 9       | 1.6E-06       | 2.0E-07 | 1.1E-05 | 4.5E-05     | 9.2E-05 | 6.1E-03 | 3574.3        | 2623.5   | 3211.8   | 1581.9        | 1276.4   | 1158.2   | 1811.7   | 1944.6   | 2158.3   | 1363.7   | 1248.8   | 1320.9   | No                         | No         | No         | sulfite reductase, putative, expressed                                           |
| Os_8150.1.S1_at        | LOC_Os05g42350 | 8       | 2.0E-06       | 8.0E-09 | 6.0E-06 | 5.4E-05     | 1.2E-05 | 3.9E-03 | 4076.2        | 4291.9   | 3967.2   | 1512.6        | 1429.1   | 1643.8   | 2431.5   | 2364.2   | 2550.9   | 1576.5   | 1418.2   | 1446.7   | No                         | No         | No         | sulfite reductase, putative, expressed                                           |
| Os_8150.2.S1_x_at      | LOC_Os05g42350 | 9       | 3.7E-06       | 3.8E-07 | 2.3E-05 | 8.6E-05     | 1.4E-04 | 9.7E-03 | 3067.5        | 3195.1   | 2909.5   | 1342.4        | 1279.6   | 1734.1   | 1771.2   | 1701.9   | 1359.2   | 1225.9   | 1161.8   | 1406.7   | No                         | No         | No         | sulfite reductase, putative, expressed                                           |
| Os_55637.1.S1_at       | LOC_Os05g45070 | 7       | 2.6E-09       | 9.4E-10 | 7.4E-09 | 6.6E-07     | 3.5E-06 | 5.8E-05 | 116.4         | 158.9    | 134.7    | 386.6         | 169.3    | 171.2    | 88.4     | 128.1    | 113.8    | 871      | 973      | 1027     | Yes                        | No         | Yes        | harpin-induced protein, putative, expressed                                      |
| Os_9327.1.S1_at        | LOC_Os05g45460 | 2       | 2.1E-06       | 2.9E-05 | 5.6E-05 | 5.6E-05     | 2.6E-03 | 1.7E-02 | 574.7         | 564.6    | 595.4    | 1638.2        | 2578.4   | 247.6    | 24.7     | 163      | 203.9    | 1448.1   | 840.3    | 1372.6   | No                         | Yes        | Yes        | hist1-specific extensin-like protein precursor, putative, expressed              |
| Os_7325.1.S1_x_at      | LOC_Os05g45840 | 5       | 3.6E-05       | 2.2E-04 | 1.1E-03 | 4.7E-04     | 1.0E-01 | 1.2E-01 | 1494.5        | 1597.4   | 1568.8   | 1000          | 879.8    | 1005.3   | 769.2    | 786.1    | 969.4    | 715.1    | 655.6    | 893.2    | No                         | No         | No         | GTPase activating protein for Arf containing protein, putative, expressed        |
| Os_8961.1.S1_s_at      | LOC_Os05g46020 | 4       | 3.1E-07       | 3.6E-06 | 7.5E-04 | 1.4E-06     | 6.3E-04 | 9.0E-02 | 714.6         | 574      | 704.2    | 342.2         | 303.3    | 316.7    | 241.4    | 245.4    | 245.1    | 184      | 149.3    | 139      | No                         | No         | No         | OsWRKY7 - Superfamily of rice TFs having WRKY and zinc finger domains, expressed |
| OsAffx.4639.1.S1_at    | LOC_Os05g46610 | 2       | 2.2E-08       | 3.6E-05 | 4.3E-04 | 2.5E-06     | 4.5E-03 | 6.3E-02 | 520.2         | 584.9    | 840.9    | 840.9         | 652.1    | 681.6    | 372.1    | 373.6    | 409.3    | 447.2    | 370.3    | 406.2    | No                         | No         | No         | myb-related protein Hk33, putative, expressed                                    |
| OsAffx.27357.2.S1_at   | LOC_Os05g47750 | 6       | 1.3E-09       | 2.4E-06 | 9.5E-06 | 4.4E-07     | 4.8E-04 | 5.4E-03 | 688.2         | 672.3    | 588.7    | 370.4         | 387.7    | 362.1    | 45.4     | 94.1     | 74.1     | 38       | 112.4    | 65.8     | No                         | Yes        | Yes        | Ser/Thr protein kinase, putative, expressed                                      |
| Os_53178.1.S1_s_at     | LOC_Os05g47840 | 4       | 2.6E-07       | 1.7E-06 | 2.7E-06 | 1.3E-05     | 3.8E-04 | 2.4E-03 | 45.6          | 32.3     | 35.9     | 76.4          | 80.3     | 59.6     | 112.5    | 163.9    | 118.7    | 260.3    | 413.1    | 284.6    | No                         | No         | No         | AT1PT1, putative, expressed                                                      |
| OsAffx.27370.1.S1_at   | LOC_Os05g48570 | 6       | 1.3E-06       | 4.2E-05 | 2.1E-05 | 3.9E-05     | 3.3E-03 | 9.2E-03 | 187           | 213.4    | 246.4    | 213.7         | 208.7    | 227.3    | 330.3    | 314.7    | 347.8    | 1040.1   | 873.6    | 911.2    | No                         | No         | Yes        | conserved hypothetical protein                                                   |
| OsAffx.15154.1.S1_at   | LOC_Os05g48650 | 6       | 1.6E-09       | 3.0E-06 | 2.7E-06 | 1.6E-07     | 5.5E-04 | 2.4E-03 | 416.5         | 355.3    | 387.2    | 235.9         | 170.8    | 114.6    | 9.7      | 13       | 10.3     | 3.5      | 5        | 14.3     | No                         | No         | No         | tumor-related protein-like, putative, expressed                                  |
| Os_13704.1.S1_s_at     | LOC_Os05g48910 | 9       | 3.3E-10       | 3.2E-10 | 2.4E-10 | 2.0E-07     | 2.0E-06 | 8.4E-06 | 185.9         | 293.0    | 200.4    | 9.5           | 25.6     | 11.6     | 11.7     | 10.8     | 31.4     | 2.3      | 23.4     | 5.2      | No                         | No         | No         | retrotransposon protein, putative, unclassified                                  |
| Os_5124.1.S1_at        | LOC_Os05g49770 | 11      | 2.7E-07       | 4.8E-10 | 1.7E-07 | 1.3E-05     | 2.5E-06 | 4.1E-04 | 2134.9        | 1939     | 1868.4   | 719.2         | 601.5    | 710      | 1170.3   | 1150     | 1141.4   | 590.1    | 643      | 739.8    | No                         | No         | No         | CTP synthase, putative, expressed                                                |
| Os_5124.1.S1_s_at      | LOC_Os05g49770 | 5       | 2.4E-04       | 3.4E-07 | 1.2E-04 | 2.2E-03     | 1.3E-04 | 7.1E-02 | 3734.5        | 3951.2   | 4101.4   | 1356.6        | 1471.4   | 1763.2   | 2927     | 2960.3   | 3005.2   | 1564.6   | 1698.1   | 2103.4   | No                         | No         | No         | CTP synthase, putative, expressed                                                |
| Os_56284.1.S1_at       | LOC_Os05g50580 | 2       | 2.4E-06       | 2.3E-04 | 2.8E-04 | 6.2E-05     | 1.1E-02 | 4.8E-02 | 86.6          | 70       | 61.3     | 51.3          | 70.2     | 90       | 10.7     | 37.9     | 26.1     | 3.6      | 16.7     | 4.9      | No                         | Yes        | Yes        | SCPL50, putative, expressed                                                      |
| Os_10131.1.S1_s_at     | LOC_Os05g51870 | 7       | 2.0E-05       | 5.1E-07 | 5.3E-06 | 3.0E-04     | 1.7E-04 | 3.6E-03 | 2583.6        | 2825.4   | 2678.1   | 1320          | 1158.1   | 1166.6   | 1400.4   | 2066.9   | 1586.3   | 1479.3   | 1256.6   | 1414.6   | No                         | No         | No         | UDP-glucose 4-epimerase GEP148, putative, expressed                              |
| Os_8578.1.S1_at        | LOC_Os06g01350 | 7       | 7.2E-08       | 2.6E-08 | 2.7E-06 | 5.4E-06     | 2.5E-05 | 2.4E-03 | 1786.6        | 2135.6   | 2392.7   | 737.6         | 893.3    | 892.3    | 897.9    | 1087.3   | 945.2    | 665.3    | 506.6    | 726      | No                         | No         | No         | transferase, putative, expressed                                                 |
| Os_11622.1.S1_at       | LOC_Os06g01360 | 9       | 8.1E-07       | 1.5E-06 | 2.2E-05 | 3.1E-05     | 5.6E-04 | 9.4E-03 | 1449.7        | 2137.2   | 1753.1   | 552.4         | 580.6    | 525.5    | 818.1    | 723.5    | 614.9    | 432.4    | 569      | 552.4    | No                         | No         | No         | homogentisate 1,2-dioxygenase, putative, expressed                               |
| OsAffx.22609.1.S1_x_at | LOC_Os06g01920 | 6       | 1.8E-05       | 3.7E-07 | 3.3E-06 | 2.8E-04     | 1.4E-04 | 2.7E-03 | 185.5         | 161.1    | 167.1    | 882.2         | 395.1    | 387.4    | 199.8    | 170.2    | 203.4    | 1569     | 1335     | 1763.3   | Yes                        | No         | No         | alpha-expansin 7 precursor, putative, expressed                                  |
| Os_39933.1.S1_x_at     | LOC_Os06g02440 | 3       | 1.5E-04       | 1.5E-05 | 1.3E-03 | 1.4E-03     | 1.7E-03 | 1.2E-01 | 275.9         | 197.1    | 264.6    | 97.6          | 111.7    | 87.4     | 98.1     | 124.6    | 137.8    | 57.2     | 64.6     | 68.8     | No                         | No         | No         | expressed protein                                                                |
| Os_4518.1.S1_s_at      | LOC_Os06g02490 | 9       | 4.7E-06       | 2.4E-06 | 2.6E-05 | 1.0E-04     | 4.7E-04 | 1.0E-02 | 964.5         | 927.1    | 1017.6   | 1248.4        | 1040.3   | 1133.4   | 1040.3   | 1183.8   | 1235.9   | 2624.4   | 2544     | No       | No                         | Yes        | Yes        | acyl-CoA-binding protein, putative, expressed                                    |
| Os_4518.2.S1_x_at      | LOC_Os06g02490 | 7       | 1.4E-06       | 9.6E-07 | 1.3E-05 | 4.1E-05     | 2.6E-04 | 6.8E-03 | 1549.1        | 1313.9   | 1420.6   | 2013.6        | 1313.1   | 1577.2   | 1556.4   | 1688.4   | 1863.6   | 2962.7   | 3237.7   | 3513.4   | No                         | No         | Yes        | acyl-CoA-binding protein, putative, expressed                                    |
| Os_1638-06.1.S1_at     | LOC_Os06g03810 | 11      | 1.6E-06       | 8.1E-06 | 8.3E-06 | 4.1E-05     | 1.1E-03 | 4.9E-03 | 2276.2        | 2740.3   | 2528.5   | 1028.9        | 1164.9   | 1022.7   | 596.5    | 1038.6   | 587.7    | 767.8    | 394.5    | 488.6    | No                         | No         | No         | expressed protein                                                                |
| Os_606.1.S1_at         | LOC_Os06g04220 | 9       | 5.1E-06       | 6.8E-10 | 2.4E-06 | 1.1E-04     | 3.3E-04 | 2.3E-02 | 671.7         | 573.8    | 826.7    | 154.2         | 77.4     | 47.4     | 376.6    | 403.3    | 427      | 171      | 144.8    | 170.9    | No                         | No         | No         | expressed protein                                                                |
| Os_4773.1.S1_at        | LOC_Os06g04240 | 6       | 1.5E-04       | 1.2E-07 | 5.6E-05 | 1.4E-03     | 6.5E-05 | 1.7E-02 | 2258.3        | 1883.6   | 2286.4   | 390           | 383.1    | 437.9    | 1105.4   | 1229.3   | 993.2    | 592.3    | 354.8    | 443.4    | No                         | No         | No         | Q-rich domain protein, putative, expressed                                       |
| Os_7031.1.S1_at        | LOC_Os06g04450 | 4       | 4.5E-06       | 4.1E-08 | 5.3E-06 | 9.8E-05     | 3.3E-05 | 3.6E-03 | 57            | 38.3     | 42.9     | 170.5         | 168.8    | 38.6     | 43.6     | 38.6     | 318.1    | 332.8    | 321.3    | No       | No                         | No         | No         | SNARE-interacting protein KEULE, putative, expressed                             |
| Os_21318.1.S1_at       | LOC_Os06g04510 | 5       | 1.7E-06       | 1.4E-10 | 5.8E-07 | 4.7E-05     | 1.5E-06 | 9.1E-04 | 10337.5       | 8961.2   | 9648.2   | 797.1         | 702.2    | 704.5    | 6030     | 7084.5   | 6430.4   | 969.4    | 1152.8   | 1138.4   | No                         | No         | No         | enolase 1, putative, expressed                                                   |
| Os_38638.1.S1_at       | LOC_Os06g04990 | 3       | 1.2E-05       | 1.6E-03 | 4.2E-04 | 2.0E-04     | 4.2E-02 | 6.2E-02 | 867.8         | 1640.9   | 1372     | 2205.8        | 2979.5   | 3627.9   | 814.7    | 416.4    | 703.9    | 520      | 353.3    | 461      | Yes                        | No         | No         | early nodulin 93, putative, expressed                                            |
| Os_10862.1.S1_at       | LOC_Os06g05010 | 1       | 1.2E-08       | 1.6E-08 | 1.6E-08 | 1.7E-06     | 1.9E-05 | 9.1E-05 | 928.2         | 744.2    | 761.9    | 73.3          | 62.2     | 48.7     | 11.3     | 29.8     | 24.3     | 1.3      | 21       | 14       | Yes                        |            |            |                                                                                  |

| Probe Set ID           | Locus ID       | probe # | ANOVA p-value |         |         | FDR q-value |         |         | Nipponbare MW |          |          | Nipponbare CK |          |          | 93-11 MW |          |          | 93-11 CK |          |          | Indel (Indica vs Japonica) |      |                                                 | Annotation                                                                    |
|------------------------|----------------|---------|---------------|---------|---------|-------------|---------|---------|---------------|----------|----------|---------------|----------|----------|----------|----------|----------|----------|----------|----------|----------------------------|------|-------------------------------------------------|-------------------------------------------------------------------------------|
|                        |                |         | C             |         |         | C           |         |         | Repeat 1      |          |          | Repeat 2      |          |          | Repeat 1 |          |          | Repeat 2 |          |          | upstream                   |      |                                                 |                                                                               |
|                        |                |         | C             | T       | CxT     | C           | T       | CxT     | Repeat 1      | Repeat 2 | Repeat 3 | Repeat 1      | Repeat 2 | Repeat 3 | Repeat 1 | Repeat 2 | Repeat 3 | Repeat 1 | Repeat 2 | Repeat 3 | upstream                   | gene | downstream                                      |                                                                               |
| Os_25409.1.S1_x_at     | LOC_Os06g45184 | 9       | 1.8E-08       | 1.8E-08 | 2.2E-06 | 2.2E-06     | 2.0E-05 | 1.0E-04 | 466.5         | 453.5    | 394.4    | 0.9           | 31.6     | 17.6     | 37.7     | 42.7     | 48.9     | 8.2      | 19.9     | 9.2      | No                         | No   | No                                              | retrotransposon protein, putative, Ty3-gypsy subclass, expressed              |
| Os_24196.1.A1_x_at     | LOC_Os06g45200 | 3       | 3.1E-05       | 5.5E-06 | 2.5E-05 | 4.2E-04     | 8.2E-04 | 1.0E-02 | 31.5          | 13.3     | 26.3     | 1.5           | 7.3      | 11.7     | 4.9      | 31.4     | 12       | 6.1      | 10.5     | 25.7     | No                         | No   | No                                              | pol111-like Phl p 2 precursor, putative, expressed                            |
| Os_55395.1.S1_x_at     | LOC_Os06g45570 | 4       | 3.9E-06       | 3.5E-07 | 5.1E-04 | 8.8E-05     | 1.3E-04 | 7.1E-02 | 1030.6        | 907.7    | 783.3    | 585.1         | 516.8    | 359.8    | 449.9    | 535.9    | 463.4    | 418.5    | 323.1    | 38.9     | No                         | No   | No                                              | VQ motif family protein, expressed                                            |
| Os_52280.1.S1_at       | LOC_Os06g46149 | 5       | 9.4E-08       | 5.1E-08 | 2.9E-07 | 6.4E-06     | 3.8E-05 | 5.8E-04 | 318.9         | 230.1    | 239.3    | 60.6          | 71.2     | 56.2     | 80.4     | 100.3    | 95       | 48       | 53.6     | 87.5     | No                         | Yes  | Yes                                             | expressed protein                                                             |
| Os_55380.1.S1_at       | LOC_Os06g46740 | 6       | 9.4E-08       | 8.0E-08 | 9.8E-07 | 1.7E-04     | 5.1E-05 | 1.3E-03 | 736.5         | 536.9    | 612.7    | 70.6          | 79.6     | 80.9     | 202.3    | 204.5    | 231.3    | 122.8    | 166.1    | 176.7    | No                         | No   | No                                              | early nodulin 20 precursor, putative, expressed                               |
| OsAffx_28152.2.S1_at   | LOC_Os06g47470 | 3       | 2.4E-06       | 3.6E-06 | 8.6E-05 | 6.2E-05     | 6.3E-04 | 2.2E-02 | 200           | 248      | 179.7    | 115.6         | 130      | 95.8     | 90.3     | 134.3    | 158.8    | 70.6     | 80.6     | 55.3     | No                         | Yes  | Yes                                             | protein kinase domain containing protein, expressed                           |
| OsAffx_28152.1.S1_at   | LOC_Os06g47530 | 4       | 4.6E-08       | 3.0E-05 | 3.8E-05 | 4.0E-06     | 2.7E-03 | 1.3E-02 | 271.5         | 293.3    | 208.8    | 246.2         | 148      | 141.4    | 10.7     | 48.6     | 80.9     | 36       | 37.1     | 21.7     | No                         | No   | Yes                                             | serine/threonine-protein kinase receptor precursor, putative, expressed       |
| OsAffx_28152.1.S1_at   | LOC_Os06g47530 | 4       | 1.7E-09       | 5.1E-07 | 3.2E-06 | 5.0E-07     | 1.7E-04 | 2.7E-03 | 1025.8        | 862.8    | 899.5    | 576.1         | 505.6    | 460.9    | 516.5    | 212      | 212.9    | 62       | 209.2    | 139.8    | No                         | No   | No                                              | serine/threonine-protein kinase receptor precursor, putative, expressed       |
| OsAffx_15979.1.S1_at   | LOC_Os06g48010 | 4       | 2.0E-06       | 5.6E-07 | 1.4E-06 | 5.3E-05     | 1.8E-04 | 1.6E-03 | 112.6         | 87.6     | 176.6    | 512.7         | 420.3    | 540.3    | 65       | 223.7    | 256.9    | 152.3    | 105.9    | 311.5    | No                         | No   | Yes                                             | peroxidase 16 precursor, putative, expressed                                  |
| OsAffx_15979.1.S1_x_at | LOC_Os06g48010 | 3       | 9.5E-05       | 2.9E-05 | 7.5E-05 | 9.9E-04     | 2.1E-02 | 3.8E-07 | 366.7         | 310.4    | 315.8    | 216.1         | 710.4    | 767.5    | 239.6    | 358.3    | 361.7    | 363.1    | 308.5    | 485.9    | No                         | No   | Yes                                             | peroxidase 16 precursor, putative, expressed                                  |
| OsAffx_15979.1.S1_x_at | LOC_Os06g48050 | 9       | 1.1E-07       | 3.8E-08 | 2.1E-07 | 6.9E-06     | 3.2E-05 | 4.7E-04 | 46            | 94.1     | 116.8    | 186.4         | 150.4    | 168.9    | 65.4     | 90.3     | 88.5     | 517.5    | 528.2    | 575.8    | No                         | No   | No                                              | expressed protein                                                             |
| OsAffx_28169.2.S1_at   | LOC_Os06g48240 | 3       | 9.7E-06       | 3.9E-04 | 4.8E-04 | 1.7E-04     | 1.6E-02 | 8.6E-02 | 413           | 282.3    | 385.2    | 258.5         | 177      | 168.8    | 85.2     | 77.3     | 122      | 69.9     | 52.7     | 70       | Yes                        | Yes  | No                                              | ATPase protein, putative, expressed                                           |
| Os_56682.1.S1_at       | LOC_Os06g50940 | 6       | 1.2E-05       | 2.0E-07 | 1.4E-03 | 2.0E-04     | 9.3E-05 | 1.3E-01 | 1673.8        | 1596.7   | 1965.7   | 484.4         | 713      | 427.9    | 779.4    | 1140.8   | 752.1    | 314.4    | 406.6    | 338.4    | Yes                        | No   | No                                              | anther-specific proline-rich protein APG precursor, putative, expressed       |
| Os_51172.1.S1_x_at     | LOC_Os06g51050 | 3       | 2.4E-08       | 3.2E-04 | 3.5E-04 | 2.6E-06     | 3.3E-02 | 5.3E-02 | 1359.8        | 1614.6   | 1647.7   | 1057.5        | 963.3    | 1222     | 111.1    | 69.8     | 65.2     | 73.5     | 107.3    | 81.5     | No                         | No   | No                                              | basic endochitinase I precursor, putative, expressed                          |
| Os_30269.1.S1_at       | LOC_Os07g01340 | 11      | 1.8E-07       | 6.0E-07 | 9.7E-07 | 9.9E-06     | 1.9E-04 | 1.2E-03 | 222           | 166.5    | 205.9    | 69.6          | 99.7     | 43.2     | 76.9     | 48.6     | 55.2     | 43.9     | 63.1     | 35.4     | Yes                        | Yes  | Yes                                             | gibberellin 2-beta-dioxigenase 7, putative, expressed                         |
| OsAffx_28221.1.S1_at   | LOC_Os07g01420 | 9       | 1.5E-04       | 7.2E-06 | 2.1E-04 | 1.4E-03     | 1.0E-03 | 4.0E-02 | 3.8           | 3.8      | 5        | 317.4         | 157.7    | 210.9    | 4.2      | 5.8      | 10.7     | 811.6    | 506.3    | 863.8    | No                         | No   | Yes                                             | peroxidase 1 precursor, putative                                              |
| OsAffx_28221.1.S1_at   | LOC_Os07g01420 | 6       | 1.2E-07       | 1.2E-07 | 2.8E-05 | 3.4E-05     | 6.7E-03 | 1.1E-02 | 625.1         | 710      | 616.2    | 573.8         | 497.4    | 526.4    | 698.6    | 694      | 937.7    | 1540.6   | 1288.7   | 1521.8   | No                         | Yes  | Yes                                             | expressed protein                                                             |
| OsAffx_5189.1.S1_at    | LOC_Os07g02870 | 13      | 3.2E-08       | 6.6E-08 | 8.6E-08 | 3.2E-06     | 4.5E-05 | 2.7E-04 | 3.3           | 57.1     | 6        | 122.1         | 57.7     | 26.4     | 67.5     | 101.5    | 46.2     | 1275.3   | 1517.3   | 1129.1   | No                         | No   | No                                              | conserved hypothetical protein                                                |
| Os_40003.1.S1_x_at     | LOC_Os07g02920 | 3       | 3.0E-05       | 1.2E-05 | 2.7E-05 | 4.1E-04     | 1.4E-03 | 1.1E-02 | 34.7          | 66       | 36.6     | 46.1          | 42       | 23.9     | 34.6     | 58.4     | 85.9     | 34.9     | 144.9    | 102.8    | No                         | No   | No                                              | expressed protein                                                             |
| Os_32682.1.S1_at       | LOC_Os07g02960 | 10      | 4.6E-09       | 9.5E-10 | 1.4E-08 | 9.2E-07     | 3.5E-06 | 8.4E-05 | 1374.3        | 1424.8   | 1689.6   | 259.7         | 273.8    | 327.6    | 426      | 613      | 468.1    | 126.6    | 195.6    | 171.7    | No                         | No   | No                                              | expressed protein                                                             |
| Os_32682.2.S1_x_at     | LOC_Os07g02960 | 11      | 1.3E-06       | 9.9E-08 | 5.1E-06 | 3.9E-05     | 9.0E-05 | 3.3E-03 | 1330.5        | 1124.9   | 1263.1   | 286.2         | 231      | 324.7    | 326.5    | 393.8    | 510.8    | 171.3    | 153.9    | 204.7    | No                         | No   | No                                              | expressed protein                                                             |
| OsAffx_16056.1.S1_at   | LOC_Os07g03020 | 3       | 2.2E-04       | 2.4E-05 | 1.8E-04 | 9.2E-07     | 2.3E-03 | 3.6E-02 | 133.6         | 147.2    | 99.3     | 2.4           | 7.3      | 29.7     | 4.7      | 16.7     | 8.5      | 5.8      | 6.8      | 2.7      | Yes                        | No   | No                                              | hypothetical protein                                                          |
| OsAffx_16082.1.S1_at   | LOC_Os07g04560 | 10      | 3.9E-06       | 5.0E-07 | 1.1E-05 | 8.8E-05     | 1.7E-04 | 6.2E-03 | 390.5         | 286.1    | 376.3    | 50.5          | 53.7     | 52       | 102.4    | 80.9     | 121.7    | 10.5     | 33.9     | 23.4     | Yes                        | No   | No                                              | NAC domain-containing protein 94, putative                                    |
| OsAffx_28276.1.S1_x_at | LOC_Os07g04970 | 7       | 1.8E-07       | 1.5E-08 | 7.8E-07 | 1.0E-05     | 1.8E-05 | 1.1E-03 | 1650.6        | 1027.5   | 1101.9   | 335.7         | 128.7    | 113.8    | 412.2    | 402.5    | 365.4    | 93.2     | 65.2     | 27.1     | No                         | No   | No                                              | transferase, putative, expressed                                              |
| OsAffx_16129.1.S1_at   | LOC_Os07g06800 | 3       | 7.6E-08       | 1.6E-04 | 4.9E-04 | 5.6E-06     | 8.2E-03 | 6.9E-02 | 80.5          | 69.8     | 119.4    | 150.8         | 62.1     | 63.6     | 161.6    | 152.1    | 184.4    | 275.2    | 265.6    | 220.3    | No                         | No   | No                                              | 3-oxo-5-alpha-steroid 4-dehydrogenase 2, putative, expressed                  |
| Os_11982.1.S1_at       | LOC_Os07g07170 | 3       | 1.3E-05       | 9.7E-08 | 2.2E-03 | 2.2E-04     | 5.5E-05 | 1.7E-01 | 2475          | 2432.9   | 2290.3   | 1798.5        | 1359.2   | 1671.1   | 1756.6   | 2055.1   | 1638.4   | 1698.3   | 1960.7   | 154.7    | No                         | Yes  | Yes                                             | 3-methyl-2-oxobutanate dehydrogenase 2, putative, expressed                   |
| Os_32503.1.S1_x_at     | LOC_Os07g08130 | 7       | 4.3E-06       | 3.0E-08 | 4.3E-06 | 9.6E-05     | 3.3E-02 | 5.5E-02 | 3249.9        | 3434.8   | 3695.5   | 590.6         | 706      | 473.9    | 1570.7   | 2022.5   | 1727.9   | 724.5    | 796.6    | 730.8    | Yes                        | Yes  | Yes                                             | indole-3-glycerol phosphate lyase, chloroplast precursor, putative, expressed |
| Os_32503.1.S1_x_at     | LOC_Os07g08430 | 11      | 4.5E-07       | 2.1E-09 | 3.3E-07 | 1.9E-05     | 5.8E-06 | 6.3E-04 | 4566.8        | 4490.7   | 4084.7   | 941.1         | 968.8    | 800.3    | 1962     | 2402.3   | 1762.5   | 912.9    | 911.8    | 828.1    | Yes                        | Yes  | Yes                                             | indole-3-glycerol phosphate lyase, chloroplast precursor, putative, expressed |
| Os_10872.1.S1_at       | LOC_Os07g09042 | 5       | 1.0E-06       | 2.2E-09 | 1.1E-06 | 3.3E-05     | 5.9E-06 | 1.4E-03 | 2992.4        | 4013.2   | 3602.5   | 722.9         | 859.7    | 783.3    | 1967.5   | 3523.3   | 2376.3   | 1066.2   | 944.4    | 784.5    | No                         | Yes  | Yes                                             | ATPase 2, putative, expressed                                                 |
| Os_48723.1.A1_at       | LOC_Os07g09710 | 3       | 2.6E-06       | 2.0E-03 | 5.0E-03 | 6.6E-05     | 4.8E-02 | 2.7E-01 | 47            | 38.2     | 21.5     | 30.9          | 12.4     | 36.4     | 192.7    | 237.9    | 209.1    | 125.9    | 112.7    | 152.7    | Yes                        | No   | No                                              | F-box domain containing protein, expressed                                    |
| OsAffx_5270.1.S1_at    | LOC_Os07g09710 | 4       | 2.4E-05       | 3.6E-04 | 8.1E-04 | 3.5E-04     | 1.5E-02 | 9.5E-02 | 68.6          | 48.8     | 44.4     | 56.6          | 67.8     | 59.6     | 250.8    | 228.1    | 217.9    | 153.8    | 202.6    | 164.7    | Yes                        | No   | No                                              | F-box domain containing protein, expressed                                    |
| Os_51134.1.S1_at       | LOC_Os07g10190 | 4       | 4.1E-10       | 3.8E-06 | 7.7E-06 | 2.2E-07     | 6.5E-04 | 4.7E-03 | 223.4         | 160.2    | 171.7    | 314           | 204.4    | 187.6    | 584.6    | 1139.4   | 943.4    | 1706.2   | 1867.4   | 1851.3   | Yes                        | No   | No                                              | anthocyanidin 3-O-glucosyltransferase, putative, expressed                    |
| Os_51134.2.S1_x_at     | LOC_Os07g10220 | 3       | 9.5E-07       | 2.6E-05 | 1.0E-04 | 2.2E-05     | 2.4E-03 | 2.5E-02 | 106.8         | 65.4     | 175.8    | 119.4         | 114      | 227.7    | 224.2    | 216.3    | 454.2    | 447.7    | 421      | Yes      | No                         | No   | anthocyanidin 3-O-glucosyltransferase, putative |                                                                               |
| OsAffx_28379.1.S1_at   | LOC_Os07g10230 | 9       | 1.9E-09       | 4.5E-09 | 3.2E-08 | 5.4E-07     | 8.9E-06 | 1.5E-04 | 48            | 35.8     | 43.5     | 81.2          | 77       | 75       | 126.8    | 127.4    | 153.1    | 566.8    | 685.1    | 684.2    | No                         | No   | No                                              | hydroquinone glucosyltransferase, putative, expressed                         |
| Os_18981.1.S1_at       | LOC_Os07g18120 | 9       | 5.5E-07       | 3.1E-09 | 1.5E-07 | 2.2E-05     | 7.1E-06 | 3.9E-04 | 372.2         | 550.9    | 383.7    | 692           | 737.8    | 519.5    | 313.3    | 438.8    | 401.3    | 1638.3   | 1774.8   | 2052.5   | Yes                        | Yes  | Yes                                             | abscisic-aldehyde oxidase, putative, expressed                                |
| Os_18981.1.S1_x_at     | LOC_Os07g18120 | 11      | 1.2E-05       | 1.0E-07 | 2.2E-06 | 2.0E-04     | 6.0E-05 | 2.1E-03 | 610.1         | 877.5    | 612.8    | 910.6         | 956.6    | 838.3    | 491.4    | 746.5    | 671.1    | 1953.2   | 2621.7   | 2444.5   | Yes                        | Yes  | Yes                                             | abscisic-aldehyde oxidase, putative, expressed                                |
| OsAffx_28501.1.S1_x_at | LOC_Os07g18120 | 8       | 1.7E-06       | 3.0E-09 | 9.7E-08 | 4.7E-05     | 6.9E-06 | 2.9E-04 | 607.7         | 599.4    | 538.2    | 882.4         | 888.8    | 538.5    | 358.4    | 489.9    | 427      | 163.3    | 1766.1   | 1754.5   | Yes                        | Yes  | Yes                                             | abscisic-aldehyde oxidase, putative, expressed                                |
| Os_90                  |                |         |               |         |         |             |         |         |               |          |          |               |          |          |          |          |          |          |          |          |                            |      |                                                 |                                                                               |

| Probe Set ID           | Locus ID       | probe # | ANOVA p-value |         |         | FDR q-value |         |         | Nipponbare MW |          |          | Nipponbare CK |          |          | 93-11 MY |          |          | 93-11 CK |          |          | Indel (Indica vs Japonica) |            | Annotation                                               |                                                                                  |
|------------------------|----------------|---------|---------------|---------|---------|-------------|---------|---------|---------------|----------|----------|---------------|----------|----------|----------|----------|----------|----------|----------|----------|----------------------------|------------|----------------------------------------------------------|----------------------------------------------------------------------------------|
|                        |                |         | C             | T       | CxT     | C           | T       | CxT     | Repeat 1      | Repeat 2 | Repeat 3 | Repeat 1      | Repeat 2 | Repeat 3 | Repeat 1 | Repeat 2 | Repeat 3 | Repeat 1 | Repeat 2 | Repeat 3 | upstream                   | downstream |                                                          |                                                                                  |
| Os. 11218.1.S1_at      | LOC_Os07g44440 | 4       | 3.1E-04       | 1.2E-12 | 6.5E-05 | 2.4E-03     | 1.1E-07 | 1.9E-02 | 22408.7       | 25034.2  | 21183.4  | 684.6         | 2817.9   | 1026.9   | 20662    | 21694.9  | 21711.8  | 2089     | 2414.2   | 1343.9   | Yes                        | No         | peroxidoreductase, putative, expressed                   |                                                                                  |
| OsAffx. 27506.1.S1_at  | LOC_Os07g44450 | 8       | 1.4E-07       | 2.3E-10 | 1.7E-07 | 8.5E-06     | 1.3E-04 | 1.5E-04 | 152.4         | 120.6    | 66.7     | 521.8         | 590.4    | 110.6    | 132.4    | 151.6    | 1770.1   | 1866     | 1813.1   | No       | No                         | No         | peroxidoreductase, putative, expressed                   |                                                                                  |
| Os. 29933.1.S1_at      | LOC_Os07g44910 | 1       | 3.5E-07       | 3.0E-06 | 1.0E-04 | 8.8E-06     | 5.5E-04 | 2.5E-02 | 374.9         | 561.3    | 402      | 718.5         | 512.3    | 593.6    | 173.6    | 171.9    | 156.6    | 332.4    | 369.4    | 437.7    | Yes                        | Yes        | Yes                                                      | gibberellin receptor GID1L2, putative, expressed                                 |
| Os. 34356.1.S1_at      | LOC_Os07g45260 | 3       | 1.3E-04       | 7.8E-03 | 1.7E-04 | 1.2E-03     | 1.2E-01 | 3.5E-02 | 401           | 472.5    | 338.3    | 245.8         | 188.4    | 174      | 146.9    | 107.9    | 91.3     | 228.6    | 219.6    | 144.6    | No                         | No         | No                                                       | transferase, transferring glycosyl groups, putative, expressed                   |
| OsAffx. 30966.4.S1_at  | LOC_Os07g46060 | 5       | 3.0E-04       | 2.9E-04 | 2.8E-04 | 2.4E-03     | 1.3E-02 | 4.9E-02 | 38.9          | 19.5     | 19       | 38.5          | 2        | 7.9      | 2.8      | 1        | 19.8     | 209.8    | 163.1    | 115.6    | Yes                        | No         | Yes                                                      | expressed protein                                                                |
| Os. 26799.1.A1_at      | LOC_Os07g47590 | 5       | 7.6E-04       | 1.3E-05 | 1.2E-03 | 4.9E-03     | 3.0E-03 | 1.2E-01 | 2224.2        | 1716.2   | 2241.5   | 892.7         | 771.5    | 963.7    | 1367.2   | 993.9    | 1255.6   | 993.4    | 768      | 961.7    | No                         | No         | No                                                       | expressed protein                                                                |
| Os. 11556.1.S1_at      | LOC_Os07g48030 | 3       | 1.2E-04       | 3.5E-08 | 2.9E-04 | 1.2E-03     | 1.6E-05 | 1.0E-02 | 869.5         | 1024.4   | 953.4    | 4722.7        | 3864.7   | 5628.8   | 1328.1   | 1668.5   | 1595.2   | 3187     | 3460     | 3094     | No                         | No         | No                                                       | peroxidase 2 precursor, putative, expressed                                      |
| Os. 49354.1.S1_at      | LOC_Os07g48350 | 5       | 4.2E-07       | 2.3E-08 | 6.9E-06 | 1.8E-05     | 4.4E-05 | 4.9E-03 | 498.3         | 540.4    | 523.4    | 75.1          | 108.2    | 101.1    | 108.4    | 219.2    | 183.6    | 60       | 46.8     | No       | No                         | No         | serine/threonine-protein kinase NAK, putative, expressed |                                                                                  |
| Os. 32634.1.S1_at      | LOC_Os07g48870 | 3       | 1.0E-05       | 2.8E-07 | 3.3E-04 | 1.8E-04     | 1.2E-04 | 5.3E-02 | 641.9         | 709.1    | 649.1    | 200.2         | 263.4    | 190.4    | 274.1    | 266.6    | 271      | 149.2    | 113.6    | 163.9    | No                         | No         | No                                                       | typical P-type R2K3 Myb protein, putative, expressed                             |
| Os. 34729.1.S1_at      | LOC_Os07g49120 | 4       | 1.1E-04       | 8.7E-07 | 1.6E-04 | 1.1E-03     | 2.4E-04 | 3.3E-02 | 151.3         | 145.7    | 186.8    | 266.1         | 223.7    | 270.9    | 148.2    | 186.1    | 158.8    | 434.2    | 333.4    | 351.9    | Yes                        | No         | Yes                                                      | sex determination protein tasselseed-2, putative, expressed                      |
| Os. 50798.1.S1_at      | LOC_Os08g01480 | 11      | 3.9E-09       | 2.0E-09 | 1.9E-08 | 8.3E-07     | 5.5E-06 | 1.0E-04 | 1662.1        | 1579.2   | 1682.2   | 253.2         | 163.3    | 209      | 194.6    | 243      | 208.5    | 33.2     | 29.6     | 64.9     | No                         | No         | No                                                       | cytochrome P450 71C4, putative, expressed                                        |
| Os. 11284.1.S1_at      | LOC_Os08g01760 | 3       | 6.1E-05       | 2.9E-05 | 1.2E-05 | 7.0E-04     | 2.6E-03 | 6.4E-03 | 6454.7        | 5932.9   | 7234     | 3661.6        | 2953.6   | 3672.6   | 4344.2   | 4086     | 4141.2   | 4742     | 3843.8   | 4196     | No                         | No         | No                                                       | S-glutathione dehydrogenase/class III alcohol dehydrogenase, putative, expressed |
| Os. 19547.1.S1_at      | LOC_Os08g02030 | 8       | 1.3E-11       | 5.8E-11 | 1.3E-10 | 3.4E-08     | 9.8E-07 | 5.5E-06 | 3579.1        | 3108.6   | 2849.7   | 794.2         | 574.6    | 702.9    | 127.9    | 265.1    | 329      | 63.6     | 97.5     | 35       | No                         | No         | No                                                       | expressed protein                                                                |
| Os. 10574.1.S1_at      | LOC_Os08g02700 | 10      | 1.5E-12       | 6.5E-12 | 1.6E-11 | 1.3E-08     | 3.8E-07 | 1.5E-06 | 3447.3        | 2734.7   | 3174.6   | 729.7         | 678.6    | 945.2    | 254.1    | 311.9    | 335.7    | 97       | 147.6    | 86.5     | No                         | No         | No                                                       | expressed protein                                                                |
| Os. 53070.1.S1_at      | LOC_Os08g03170 | 7       | 3.2E-06       | 3.0E-08 | 8.1E-05 | 5.8E-05     | 2.8E-05 | 2.3E-02 | 5519.2        | 7633.2   | 6777.3   | 2337          | 2539.2   | 261.4    | 3434.4   | 4978.2   | 4800     | 1640.7   | 2115.5   | 2229.7   | No                         | No         | No                                                       | fructose-bisphosphate aldolase cytoplasmic isozyme, putative, expressed          |
| Os. 51918.1.S1_at      | LOC_Os08g04130 | 6       | 4.1E-07       | 1.1E-04 | 3.7E-04 | 1.1E-05     | 6.6E-03 | 5.8E-02 | 999.1         | 1145.4   | 1050     | 474.7         | 614.4    | 622.1    | 33.8     | 118.1    | 171.6    | 127.2    | 15.4     | 78.8     | Yes                        | No         | No                                                       | protein kinase, putative, expressed                                              |
| Os. 13900.1.S1_at      | LOC_Os08g04180 | 11      | 8.3E-08       | 4.1E-08 | 3.3E-07 | 5.9E-06     | 3.3E-05 | 6.4E-04 | 7487.3        | 5546.4   | 7497.1   | 2874.8        | 1962.7   | 2376.3   | 3216.4   | 2670.4   | 3038.8   | 2195.8   | 2180.1   | 2477     | No                         | Yes        | No                                                       | tryptophan synthase beta chain 1, putative, expressed                            |
| Os. 57472.1.S1_x_at    | LOC_Os08g04180 | 11      | 1.0E-06       | 3.1E-07 | 2.6E-06 | 3.3E-05     | 1.2E-04 | 2.3E-03 | 4592.9        | 3895.6   | 4475.5   | 1703.6        | 1191.2   | 1005.6   | 1731.2   | 1473     | 1872.4   | 1307.9   | 1126.6   | 1155.6   | Yes                        | No         | Yes                                                      | tryptophan synthase beta chain 1, putative, expressed                            |
| Os. 23207.1.S1_at      | LOC_Os08g04340 | 9       | 2.3E-09       | 6.8E-08 | 5.8E-08 | 5.9E-07     | 4.6E-05 | 2.1E-04 | 587.7         | 492.9    | 592.2    | 124.9         | 168.3    | 175      | 4.6      | 18.6     | 4.4      | 4.6      | 4.4      | 9.0      | No                         | No         | No                                                       | blue copper protein precursor, putative, expressed                               |
| Os. 27676.1.S1_x_at    | LOC_Os08g04540 | 9       | 1.1E-04       | 5.5E-07 | 1.2E-03 | 1.1E-03     | 1.8E-04 | 1.2E-01 | 491.7         | 346.7    | 355.9    | 95            | 90.8     | 47.4     | 134.4    | 236.5    | 189      | 45.3     | 9.8      | 67.3     | No                         | No         | No                                                       | aromatic-L-amino-acid decarboxylase, putative, expressed                         |
| OsAffx. 5702.1.S1_x_at | LOC_Os08g04560 | 4       | 2.8E-04       | 5.8E-05 | 1.6E-03 | 3.2E-03     | 4.2E-03 | 1.4E-01 | 915.7         | 1005.5   | 1214.2   | 350           | 398.8    | 422.1    | 526.8    | 381      | 504.7    | 533.6    | 400.3    | 360.4    | No                         | Yes        | No                                                       | aromatic-L-amino-acid decarboxylase, putative, expressed                         |
| Os. 10682.1.S1_at      | LOC_Os08g05960 | 7       | 1.1E-04       | 1.5E-10 | 1.7E-04 | 1.1E-03     | 1.5E-06 | 3.5E-02 | 5370.6        | 7016.7   | 6356.8   | 170           | 383.1    | 187.9    | 3893.9   | 5481.5   | 4399.9   | 178      | 224.8    | 116.4    | No                         | No         | No                                                       | expressed protein                                                                |
| Os. 36496.1.S1_at      | LOC_Os08g05980 | 6       | 8.8E-05       | 1.0E-10 | 5.2E-05 | 7.6E-04     | 1.7E-06 | 1.6E-02 | 6769.5        | 6064.7   | 7496.4   | 189.5         | 202      | 130.9    | 5995.7   | 5168     | 4817.9   | 224.5    | 183.4    | 105.7    | No                         | No         | No                                                       | expressed protein                                                                |
| Os. 26820.1.A1_at      | LOC_Os08g07080 | 4       | 5.9E-08       | 7.3E-07 | 7.9E-07 | 4.7E-06     | 2.1E-04 | 1.1E-03 | 35.2          | 40.2     | 15.8     | 16.4          | 47.2     | 32       | 118.1    | 171.6    | 127.2    | 15.4     | 78.8     | 60.6     | Yes                        | No         | No                                                       | terpene synthase 10, putative, expressed                                         |
| Os. 26820.1.S1_x_at    | LOC_Os08g07080 | 4       | 5.1E-04       | 1.1E-04 | 2.3E-05 | 3.0E-03     | 6.4E-03 | 9.7E-03 | 272           | 103.6    | 103.9    | 147.7         | 175.6    | 104.1    | 332.2    | 519.1    | 332      | 16.9     | 17.1     | 124.6    | Yes                        | No         | No                                                       | terpene synthase 10, putative, expressed                                         |
| Os. 51406.1.S1_at      | LOC_Os08g07690 | 3       | 1.0E-03       | 7.1E-06 | 2.3E-03 | 1.1E-03     | 9.9E-04 | 1.7E-04 | 543.6         | 558.1    | 533.6    | 740.1         | 605.6    | 731.6    | 92.3     | 137.9    | 205.9    | 608.1    | 704.2    | 661      | No                         | No         | No                                                       | expressed protein                                                                |
| OsAffx. 16888.1.S1_at  | LOC_Os08g07990 | 5       | 5.6E-05       | 3.0E-08 | 6.5E-04 | 6.6E-04     | 2.8E-05 | 8.2E-02 | 1360.1        | 1568.9   | 1150.1   | 230.8         | 201      | 298.5    | 584      | 862.8    | 871.4    | 78.4     | 82.1     | 81.3     | No                         | No         | No                                                       | (11674_m00736)                                                                   |
| Os. 399994.1.S1_at     | LOC_Os08g12660 | 6       | 6.9E-04       | 4.5E-06 | 7.9E-04 | 4.6E-03     | 7.7E-04 | 9.3E-02 | 336           | 434.9    | 432.3    | 52.9          | 14.5     | 43.6     | 126.6    | 203      | 281.6    | 30.2     | 25.9     | 31.9     | No                         | No         | No                                                       | retrotransposon protein, putative, Ty3-gypsy subclass                            |
| Os. 49534.1.S1_at      | LOC_Os08g17160 | 5       | 1.3E-12       | 2.8E-06 | 3.1E-06 | 1.2E-08     | 5.3E-04 | 2.6E-03 | 1466.9        | 1741.1   | 1594.7   | 1990.3        | 2415.1   | 1743.4   | 1.1      | 25.5     | 25.3     | 5        | 46.8     | 11.7     | No                         | Yes        | No                                                       | early nodulin-like protein 1 precursor, putative, expressed                      |
| Os. 49534.1.S1_x_at    | LOC_Os08g17160 | 5       | 3.5E-13       | 8.8E-07 | 4.0E-07 | 6.5E-09     | 1.4E-04 | 7.1E-04 | 2155.5        | 2181.5   | 1862     | 2822          | 2406.7   | 37.1     | 45.1     | 37.3     | 93.2     | 49       | 37.4     | 37.4     | Yes                        | No         | Yes                                                      | early nodulin-like protein 1 precursor, putative, expressed                      |
| Os. 54153.1.S1_at      | LOC_Os08g24310 | 10      | 6.3E-09       | 6.8E-07 | 4.1E-07 | 1.1E-06     | 2.0E-04 | 7.2E-04 | 840.2         | 905.1    | 874.1    | 178.5         | 247.6    | 281.8    | 43.3     | 43.3     | 58       | 10.2     | 6        | 4.3      | No                         | No         | No                                                       | lectin-like protein kinase precursor, putative, expressed                        |
| Os. 27296.1.A1_at      | LOC_Os08g24630 | 7       | 7.6E-07       | 4.1E-05 | 4.2E-05 | 9.3E-06     | 3.3E-03 | 1.4E-02 | 587.9         | 764.1    | 537.9    | 280.5         | 100.5    | 154.7    | 120.5    | 192.4    | 104.3    | 112      | 146.1    | 132.4    | No                         | No         | No                                                       | protein kinase, putative, expressed                                              |
| OsAffx. 29332.1.S1_at  | LOC_Os08g24670 | 4       | 8.7E-07       | 6.0E-05 | 4.1E-05 | 3.0E-05     | 4.3E-03 | 4.1E-02 | 112.2         | 125.1    | 75.9     | 63.6          | 4.8      | 48.9     | 2.9      | 5.6      | 7.8      | 2.9      | 3.9      | 8.4      | No                         | Yes        | No                                                       | receptor-related protein precursor, putative, expressed                          |
| Os. 51079.1.S1_at      | LOC_Os08g24750 | 5       | 2.5E-05       | 4.5E-06 | 1.9E-05 | 3.6E-04     | 7.2E-04 | 9.4E-03 | 435.4         | 429.8    | 389      | 130.6         | 119.4    | 127.5    | 164.8    | 247.3    | 207      | 165.2    | 84.3     | 90.2     | No                         | No         | No                                                       | fucosyltransferase 7, putative, expressed                                        |
| Os. 50824.1.S1_at      | LOC_Os08g26010 | 9       | 6.9E-08       | 5.2E-07 | 6.0E-07 | 5.2E-06     | 1.7E-04 | 8.3E-04 | 803.5         | 1095.8   | 785.1    | 74.4          | 153.7    | 106.6    | 12.8     | 31.7     | 25.7     | 10       | 39.2     | 1.9      | Yes                        | Yes        | Yes                                                      | transposon protein, putative, CACTA, En/Spm sub-class                            |
| Os. 50824.1.S1_x_at    | LOC_Os08g26010 | 9       | 8.3E-10       | 6.9E-09 | 1.5E-08 | 3.4E-07     | 1.1E-05 | 7.8E-05 | 1014.8        | 1320     | 1241.5   | 115.7         | 162      | 298      | 161.5    | 158.2    | 103.4    | 13.9     | 57.4     | 50.9     | Yes                        | Yes        | Yes                                                      | transposon protein, putative, CACTA, En/Spm sub-class                            |
| Os. 51235.1.S1_at      | LOC_Os08g26120 | 10      | 5.7E-07       | 8.6E-06 | 1.6E-05 | 2.2E-05     | 1.1E-03 | 8.7E-03 | 895.6         | 1019.7   | 1024     | 212.9         | 333.2    | 422.1    | 104      | 143.4    | 112.1    | 14       | 26.6     | 21.5     | Yes                        | No         | No                                                       | expressed protein                                                                |
| Os. 9543.1.S1_at       | LOC_Os08g26350 | 6       | 6.0E-06       | 6.1E-09 | 5.2E-04 | 1.2E-04     | 1.0E-05 | 7.1E-02 | 1116.1        | 1273.6   | 1116.5   | 280           | 365.6    | 228.2    | 562.6    | 748.6    | 630.4    | 174.8    | 164.3    | 184.4    | Yes                        | No         | Yes                                                      | expressed protein                                                                |
| Os. 15737.1.S1_x_at    | LOC_Os08g26710 | 6       | 3.5E-07       | 1.5E-04 | 2.1E-04 | 1.6E-05     | 8.0E-03 | 4.0E-02 | 647.1         | 906.2    | 639.4    | 411           | 415.6    | 411.7    | 4.4      | 89.7     | 6.8      | 10.8     | 5.6      | 4.2      | Yes                        | Yes        | Yes                                                      | expressed protein                                                                |
| OsAffx. 5948.1.S1_at   | LOC_Os08g27170 | 11      | 3.6E-10       | 1.1E-10 | 2.1E-10 | 1.3E-07     | 1.3E-06 | 4.5E-05 | 3551.9        | 3665.8   | 3530.7   | 274.5         | 371.7    | 549.3    | 698.1    | 703      | 526.8    | 53.8     | 110.9    | 39       | No                         | Yes        | No                                                       | calmodulin binding protein, putative                                             |
| Os. 17020.1.S1_x_at    | LOC_Os08g29570 | 4       | 2.7E-10       | 1.0E-09 | 8.0E-07 | 1.7E-07     | 3.6E-06 | 1.1E-03 | 535           | 670.8    | 458.1    | 177.2         | 229.5    | 222.9    | 202.6    | 338.1    | 352.1    | 131      | 162.1    | 136.2    | No                         | No         | No                                                       | PDR-type ABC transporter 1, putative, expressed                                  |
| Os. 11326.1.S1_at      | LOC_Os08g30510 | 3       | 8.6E-10       | 3.0E-05 | 8.3E-03 | 4.4E-07     | 2.7E-03 | 2.2E-02 | 1040.7        | 1191.8   | 1378.6   | 715.4         | 789.5    | 932      | 48.9     | 107.2    | 110.8    | 81.8     | 82.8     | 67.9     | Yes                        | No         | Yes                                                      | expressed protein                                                                |
| Os. 6288.1.S1_at       | LOC_Os08g31850 | 10      | 9.2E-10       | 3.9E-09 | 8.3E-09 | 3.5E-07     | 8.2E-06 | 6.2E-05 | 4332.5        | 5103.1   | 5015     | 619.4         | 600.5    | 1158.6   | 25.4     | 125.5    | 29.8     | 22       | 39.3     | 14.4     | Yes                        | Yes        | Yes                                                      | expressed protein                                                                |
| Os. 30528.1.S1_at      | LOC_Os08g31860 | 4       | 1.3E-07       | 2.1E-11 | 3.0E-11 | 4.4E-08     | 5.8E-07 | 2.0E-06 | 528.5         | 528.5    | 508.2    | 52.8          | 50.9     | 52.8     | 31.2     | 154.9    | 132.9    | 0.9      | 91.3     | 12.3     | No                         | Yes        | No                                                       | carbonic anhydrase precursor, putative, expressed                                |
| OsAffx. 6009.1.S1_at   | LOC_Os08g32840 | 7       | 4.9E-08       | 1.3E-05 | 2.1E-05 | 4.2E-06     | 1.1E-03 | 6.3E-03 | 461.8         | 528.2    | 507.5    | 245.3         | 172.7    | 248.2    | 28.5     | 54.6     | 58.4</   |          |          |          |                            |            |                                                          |                                                                                  |

| Probe Set ID            | Locus ID       | probe # | ANOVA p-value |         |         | FDR q-value |         |         | Nipponbare MW |          |          | Nipponbare CK |          |          | 93-11 MW |          |          | 93-11 CK |          |          | Indel (Indica vs Japonica) |            | Annotation                                             |                                                                         |                                                                     |                                                          |
|-------------------------|----------------|---------|---------------|---------|---------|-------------|---------|---------|---------------|----------|----------|---------------|----------|----------|----------|----------|----------|----------|----------|----------|----------------------------|------------|--------------------------------------------------------|-------------------------------------------------------------------------|---------------------------------------------------------------------|----------------------------------------------------------|
|                         |                |         | C             | T       | CxT     | C           | T       | CxT     | Repeat 1      | Repeat 2 | Repeat 3 | Repeat 1      | Repeat 2 | Repeat 3 | Repeat 1 | Repeat 2 | Repeat 3 | Repeat 1 | Repeat 2 | Repeat 3 | upstream                   | downstream |                                                        |                                                                         |                                                                     |                                                          |
| Os.20221.1.S1_at        | LOC_Os09g21710 | 9       | 1.7E-05       | 1.1E-07 | 5.7E-05 | 2.7E-04     | 6.2E-05 | 1.7E-02 | 2172.7        | 2080.9   | 2425.2   | 261.1         | 333.9    | 312.9    | 1164.4   | 1368.3   | 1141     | 362.7    | 268      | 315.9    | Yes                        | No         | AVI-type zinc finger protein 2B, putative, expressed   |                                                                         |                                                                     |                                                          |
| Os.53863.1.S1_at        | LOC_Os09g22010 | 7       | 9.8E-10       | 5.7E-04 | 4.3E-04 | 3.7E-07     | 2.0E-02 | 6.3E-02 | 1424.8        | 1149.8   | 1188.8   | 1003.7        | 856.1    | 820.6    | 114.8    | 25.1     | 8.5      | 52.4     | 23       | 6        | No                         | No         | hydrolyase of the HAD superfamily, putative, expressed |                                                                         |                                                                     |                                                          |
| Os.56136.1.S1_at        | LOC_Os09g25200 | 6       | 7.5E-06       | 3.8E-07 | 9.2E-05 | 1.4E-04     | 1.4E-04 | 2.3E-02 | 272.9         | 259.5    | 259.9    | 41.5          | 62.5     | 47.8     | 143.8    | 141.1    | 89.8     | 44.1     | 9        | 42.2     | Yes                        | Yes        | Yes                                                    | ubiquitin-protein ligase/ zinc ion binding protein, putative            |                                                                     |                                                          |
| Os.8168.1.S1_at         | LOC_Os09g25320 | 3       | 9.4E-04       | 6.7E-05 | 1.1E-03 | 5.8E-03     | 4.6E-03 | 1.1E-01 | 6521.5        | 7319.3   | 7507.6   | 4388.1        | 4979.9   | 4692.4   | 5490.8   | 5534.2   | 6080.8   | 5214.6   | 5445.5   | 4855     | No                         | No         | No                                                     | polyubiquitin 2, putative, expressed                                    |                                                                     |                                                          |
| Os.50202.1.S1_at        | LOC_Os09g25934 | 3       | 3.0E-07       | 3.1E-03 | 7.7E-04 | 1.4E-05     | 6.4E-02 | 9.1E-02 | 2921.5        | 337      | 282      | 288.3         | 261.3    | 275.2    | 12.5     | 21       | 27.5     | 43.7     | 26.1     | 5.2      | Yes                        | Yes        | Yes                                                    | expressed protein                                                       |                                                                     |                                                          |
| OsAffix.6404.1.S1_at    | LOC_Os09g26170 | 3       | 1.7E-04       | 1.3E-03 | 2.1E-04 | 1.6E-03     | 3.6E-02 | 8.8E-02 | 363.1         | 329.4    | 341.1    | 602           | 533.2    | 619      | 212.2    | 361.1    | 320.1    | 225.4    | 332.2    | 482      | No                         | No         | No                                                     | MYB36, putative, expressed                                              |                                                                     |                                                          |
| Os.53944.1.A1_at        | LOC_Os09g26554 | 3       | 1.6E-12       | 1.2E-06 | 3.3E-06 | 1.3E-08     | 3.0E-04 | 2.7E-03 | 1063.9        | 965.6    | 1140.4   | 1329.1        | 1255.7   | 1235.1   | 12.8     | 1.6      | 1.2      | 4.8      | 2.7      | 15.7     | Yes                        | Yes        | Yes                                                    | expressed protein                                                       |                                                                     |                                                          |
| Os.7932.1.S1_at         | LOC_Os09g26880 | 3       | 7.6E-05       | 1.5E-06 | 4.3E-04 | 1.3E-04     | 6.3E-02 | 11493.5 | 1021.2        | 11588.1  | 6572.3   | 6095.3        | 7282.3   | 9060.7   | 9082     | 9678.8   | 6671.6   | 6705     | 7271.1   | Yes      | Yes                        | No         | No                                                     | aldehyde dehydrogenase family 7 member A1, putative, expressed          |                                                                     |                                                          |
| Os.7860.1.S1_at         | LOC_Os09g27030 | 3       | 2.6E-03       | 1.3E-03 | 2.9E-03 | 1.2E-02     | 3.5E-02 | 2.0E-01 | 12415.2       | 11638.4  | 12658.7  | 10384.1       | 8792.4   | 10485.7  | 13553.7  | 12083.7  | 12605.9  | 13709.9  | 13519.9  | 12167.1  | No                         | No         | No                                                     | chitinase precursor, putative, expressed                                |                                                                     |                                                          |
| Os.9107.1.S1_x_at       | LOC_Os09g27260 | 10      | 2.4E-08       | 1.9E-10 | 4.2E-08 | 2.5E-06     | 1.7E-06 | 1.7E-04 | 4018.7        | 3538.8   | 3579.7   | 209.9         | 211      | 190.8    | 774.6    | 755.5    | 357.9    | 34.8     | 113.5    | 74.2     | No                         | No         | No                                                     | TW response-related gene product, putative, expressed                   |                                                                     |                                                          |
| Os.9107.2.S1_x_at       | LOC_Os09g27260 | 9       | 2.0E-07       | 7.4E-10 | 4.2E-07 | 1.1E-05     | 3.2E-06 | 7.3E-04 | 5425.2        | 5058.4   | 5444     | 434.9         | 651.2    | 506      | 2152.6   | 2952     | 2507.6   | 442.8    | 433.6    | 307.2    | No                         | No         | No                                                     | TW response-related gene product, putative, expressed                   |                                                                     |                                                          |
| Os.56907.1.S1_at        | LOC_Os09g27510 | 3       | 9.5E-05       | 1.7E-06 | 2.1E-05 | 9.9E-04     | 3.8E-04 | 1.9E-03 | 296.8         | 304.3    | 458.1    | 202.2         | 290.6    | 570.4    | 570.4    | 708.4    | 171.8    | 243.2    | 324.4    | No       | No                         | No         | No                                                     | cytochrome P450 76C4, putative, expressed                               |                                                                     |                                                          |
| OsAffix.30103.4.S1_s_at | LOC_Os09g27930 | 11      | 2.8E-05       | 1.5E-06 | 2.1E-05 | 3.9E-04     | 3.5E-04 | 9.0E-03 | 2329.9        | 3059.6   | 2298.2   | 12.1          | 43.5     | 27.4     | 442.7    | 490.6    | 316.2    | 31.3     | 56.6     | 10.2     | Yes                        | No         | No                                                     | UBIquitin family member, putative, expressed                            |                                                                     |                                                          |
| Os.23468.1.A1_at        | LOC_Os09g23860 | 3       | 3.3E-06       | 2.6E-07 | 2.4E-05 | 1.7E-05     | 1.7E-05 | 4.4E-03 | 221.5         | 275.3    | 252.7    | 57            | 120.3    | 111.3    | 106.1    | 165.3    | 111.1    | 122.5    | 15.2     | 53.4     | No                         | No         | No                                                     | arv5 elicitor response protein, putative, expressed                     |                                                                     |                                                          |
| Os.27924.1.S1_at        | LOC_Os09g28000 | 4       | 8.0E-09       | 1.1E-05 | 9.9E-05 | 5.8E-06     | 1.3E-03 | 1.6E-02 | 5544.6        | 6363.1   | 6219.5   | 3310          | 3082.8   | 3910.1   | 4059     | 4853     | 3890.3   | 3779.1   | 3307.5   | 3195.3   | No                         | No         | No                                                     | peptidase/ serine-type peptidase, putative, expressed                   |                                                                     |                                                          |
| Os.23183.1.S1_at        | LOC_Os09g28160 | 4       | 1.6E-04       | 1.7E-08 | 1.1E-04 | 1.5E-03     | 2.0E-05 | 2.6E-02 | 1612.7        | 2073     | 1765.6   | 397.1         | 393.6    | 379.6    | 990.6    | 1432.6   | 1007.9   | 422.9    | 397.8    | 310.4    | No                         | No         | No                                                     | phosphate carrier protein, mitochondrial precursor, putative, expressed |                                                                     |                                                          |
| OsAffix.17942.1.S1_at   | LOC_Os09g28160 | 7       | 4.4E-04       | 2.1E-08 | 1.7E-05 | 3.2E-03     | 2.2E-05 | 7.9E-02 | 903.6         | 746.8    | 669.4    | 215.8         | 491.1    | 438.2    | 248.8    | 714.4    | 448.2    | 248.8    | 174.4    | 149.5    | No                         | No         | No                                                     | phosphate carrier protein, mitochondrial precursor, putative, expressed |                                                                     |                                                          |
| Os.55695.1.S1_at        | LOC_Os09g28470 | 3       | 2.2E-04       | 3.5E-07 | 6.4E-04 | 1.9E-03     | 1.3E-04 | 8.2E-02 | 53.2          | 48.5     | 64.5     | 309.6         | 156.6    | 305.9    | 36.6     | 46.9     | 30.5     | 425.6    | 384.3    | 319.1    | Yes                        | No         | Yes                                                    | protein binding protein, putative, expressed                            |                                                                     |                                                          |
| Os.11197.2.S1_x_at      | LOC_Os09g30438 | 3       | 2.8E-07       | 1.3E-04 | 3.6E-04 | 1.4E-05     | 7.1E-03 | 4.6E-02 | 1930.4        | 1570.8   | 1253.7   | 1028.6        | 599.3    | 840.7    | 133.4    | 221.5    | 206      | 102.9    | 199.3    | 124.9    | Yes                        | Yes        | Yes                                                    | expressed protein                                                       |                                                                     |                                                          |
| OsAffix.30103.2.S1_s_at | LOC_Os09g31019 | 11      | 2.4E-06       | 1.5E-05 | 6.9E-06 | 3.4E-04     | 1.7E-03 | 4.4E-03 | 89.1          | 23.5     | 127      | 1             | 2.3      | 17       | 25.4     | 48       | 44.1     | 4.9      | 26.9     | 32.2     | No                         | No         | Yes                                                    | TBQ1, putative, expressed                                               |                                                                     |                                                          |
| Os.12239.1.S1_at        | LOC_Os09g31031 | 11      | 2.1E-06       | 1.9E-08 | 7.2E-06 | 5.6E-05     | 0.0E-05 | 4.5E-03 | 6117.5        | 5969.9   | 5661.5   | 712.8         | 687      | 782.5    | 2364.4   | 2645.8   | 1773.1   | 410.8    | 381.5    | 306      | Yes                        | Yes        | Yes                                                    | ubiquitin, putative, expressed                                          |                                                                     |                                                          |
| Os.15092.1.S1_at        | LOC_Os09g31130 | 7       | 4.9E-05       | 1.1E-04 | 3.3E-04 | 5.9E-04     | 6.4E-03 | 2.6E-03 | 1212.6        | 1484.2   | 1462.6   | 657.2         | 657.4    | 548.5    | 672.2    | 663.1    | 741.4    | 822.9    | 695.4    | No       | No                         | No         | No                                                     | tonoplast dicarboxylate transporter, putative, expressed                |                                                                     |                                                          |
| OsAffix.17976.1.S1_at   | LOC_Os09g31410 | 11      | 1.9E-11       | 7.8E-11 | 9.5E-11 | 4.2E-08     | 1.2E-06 | 4.5E-05 | 103.3         | 108.7    | 117.7    | 142.3         | 120.2    | 100.6    | 335.8    | 331.4    | 351.9    | 2186.8   | 2430     | 2186.9   | No                         | No         | No                                                     | No                                                                      | beta-glucosidase, chloroplast precursor, putative, expressed        |                                                          |
| OsAffix.6464.1.S1_at    | LOC_Os09g31990 | 9       | 1.0E-05       | 1.5E-07 | 1.2E-05 | 1.8E-04     | 7.6E-05 | 6.5E-03 | 816.2         | 1037.3   | 1131.2   | 34            | 44.2     | 19.2     | 205.7    | 310.5    | 317      | 27.9     | 7        | 4.5      | No                         | No         | No                                                     | No                                                                      | expressed protein                                                   |                                                          |
| Os.55250.1.S1_at        | LOC_Os09g32000 | 11      | 1.4E-05       | 5.1E-08 | 1.9E-05 | 2.3E-04     | 3.8E-05 | 8.7E-03 | 2654.4        | 2489.8   | 3242     | 1148          | 175.5    | 147      | 927.4    | 1091     | 136      | 109.8    | 99.1     | No       | No                         | Yes        | TW response-related gene product, putative, expressed  |                                                                         |                                                                     |                                                          |
| Os.9105.1.S1_at         | LOC_Os09g32860 | 10      | 4.1E-08       | 7.4E-10 | 1.1E-07 | 3.7E-06     | 3.2E-06 | 3.1E-04 | 12643.2       | 13447    | 13687.8  | 3895.6        | 3589.8   | 3613.8   | 7927     | 8673.6   | 8434     | 2918.2   | 4482.2   | 3832.1   | Yes                        | No         | No                                                     | No                                                                      | cyanogenic beta-glucosidase precursor, putative, expressed          |                                                          |
| OsAffix.30135.1.S1_at   | LOC_Os09g34160 | 11      | 2.8E-08       | 1.4E-09 | 3.7E-08 | 2.9E-06     | 4.4E-06 | 1.6E-04 | 1858.5        | 1774.9   | 1456.3   | 98.2          | 117.3    | 132.8    | 108.5    | 28.9     | 46.1     | 30.7     | 45.4     | Yes      | Yes                        | Yes        | Yes                                                    | Yes                                                                     | resistance protein, putative, expressed                             |                                                          |
| Os.48216.1.S1_at        | LOC_Os09g34250 | 3       | 8.7E-06       | 7.7E-08 | 1.0E-03 | 1.6E-04     | 4.9E-05 | 1.1E-01 | 6900.9        | 9051.9   | 7480.5   | 1533.2        | 2697.1   | 1741.7   | 9867.4   | 10638.2  | 11867.9  | 5585.8   | 6623.2   | 5098.9   | No                         | No         | No                                                     | No                                                                      | indole-3-acetate beta-glucosyltransferase, putative, expressed      |                                                          |
| OsAffix.6480.1.S1_at    | LOC_Os09g34860 | 7       | 1.3E-06       | 1.3E-08 | 2.2E-06 | 4.0E-05     | 1.6E-05 | 1.2E-03 | 3944.6        | 4676.2   | 3678.2   | 1762.8        | 2033.7   | 2829.5   | 2512.7   | 1848.3   | 1753.9   | 1485.8   | 1485.8   | Yes      | Yes                        | Yes        | Yes                                                    | Yes                                                                     | abhydrolase domain-containing protein 5, putative, expressed        |                                                          |
| Os.52276.1.S1_at        | LOC_Os09g35980 | 3       | 1.0E-09       | 1.1E-03 | 1.1E-03 | 3.8E-07     | 3.2E-02 | 1.1E-01 | 33.2          | 39.6     | 29       | 33.9          | 42.2     | 36.6     | 2279     | 2263.9   | 2745.6   | 1171.8   | 1175.6   | 1484.3   | No                         | No         | No                                                     | No                                                                      | expressed protein                                                   |                                                          |
| Os.15026.1.S1_at        | LOC_Os09g37540 | 8       | 9.9E-09       | 4.3E-09 | 3.1E-07 | 1.4E-06     | 8.7E-06 | 1.4E-04 | 1632.9        | 1798.2   | 1782.5   | 508.8         | 689.1    | 551.5    | 450.8    | 139      | 140.8    | 151.3    | No       | No       | No                         | No         | No                                                     | No                                                                      | carboxy-lyase, putative, expressed                                  |                                                          |
| OsAffix.30180.4.S1_at   | LOC_Os09g37840 | 4       | 5.1E-05       | 4.4E-05 | 4.1E-05 | 6.2E-04     | 3.3E-03 | 1.4E-02 | 127.7         | 198      | 146.5    | 41.7          | 36.1     | 43.4     | 41.8     | 7.8      | 27.7     | 18.8     | 45.1     | 22.9     | Yes                        | Yes        | Yes                                                    | Yes                                                                     | Yes                                                                 | ATP binding protein, putative                            |
| OsAffix.30180.4.S1_x_at | LOC_Os09g37840 | 6       | 2.6E-06       | 3.4E-08 | 4.7E-08 | 2.8E-06     | 3.0E-05 | 1.8E-04 | 189.2         | 253.9    | 202.4    | 31.7          | 15.2     | 20.2     | 34       | 7.4      | 45.3     | 14.9     | 27.4     | 4        | Yes                        | Yes        | Yes                                                    | Yes                                                                     | Yes                                                                 | ATP binding protein, putative                            |
| OsAffix.30196.1.S1_at   | LOC_Os09g39700 | 9       | 3.0E-07       | 1.7E-05 | 1.9E-05 | 1.4E-05     | 1.8E-03 | 5.4E-03 | 1022.1        | 925.1    | 1189.9   | 3337.1        | 2186.9   | 4302.3   | 2.6      | 2.5      | 15.2     | 41.6     | 2.7      | 5.2      | Yes                        | Yes        | Yes                                                    | Yes                                                                     | Yes                                                                 | chitin protein SEN102 precursor, putative, expressed     |
| OsAffix.6536.1.S1_at    | LOC_Os09g39810 | 4       | 1.9E-04       | 2.0E-05 | 2.0E-04 | 1.7E-03     | 2.0E-03 | 3.8E-02 | 319.7         | 374.4    | 260.1    | 106.4         | 63.9     | 105.5    | 15       | 76.3     | 45.8     | 28.1     | 58.8     | 12.6     | No                         | No         | No                                                     | No                                                                      | pathogenesis-related genes transcriptional activator PTI5, putative |                                                          |
| OsAffix.18062.1.S1_x_at | LOC_Os09g39850 | 6       | 6.4E-06       | 2.3E-05 | 4.7E-05 | 1.3E-04     | 2.2E-03 | 1.5E-02 | 664.1         | 600.1    | 618.3    | 233.3         | 227.8    | 198.4    | 169.3    | 191.2    | 179.4    | 144.7    | 40.7     | 155      | Yes                        | No         | No                                                     | No                                                                      | No                                                                  | transcription factor TSRF1, putative, expressed          |
| Os.52791.1.S1_at        | LOC_Os09g39960 | 5       | 3.8E-07       | 1.2E-06 | 1.5E-04 | 1.7E-05     | 3.0E-04 | 3.2E-02 | 1946.1        | 2206.9   | 1975.9   | 1168.2        | 1023.9   | 1278.7   | 986.7    | 1244.4   | 1138.6   | 669      | 709.9    | 909.5    | No                         | No         | No                                                     | No                                                                      | No                                                                  | dynamy-related protein IC, putative, expressed           |
| Os.11341.1.S1_at        | LOC_Os10g01134 | 4       | 7.3E-06       | 2.2E-08 | 9.0E-05 | 1.4E-04     | 2.2E-05 | 2.3E-02 | 1766.6        | 1706.4   | 1472.1   | 591.8         | 462      | 610.1    | 861.4    | 950.6    | 739.4    | 315      | 228      | 182.9    | No                         | No         | No                                                     | No                                                                      | No                                                                  | serine carboxypeptidase 1 precursor, putative, expressed |
| Os.46839.1.S1_at        | LOC_Os10g02300 | 4       | 9.0E-09       | 2.1E-05 | 2.3E-05 | 7.2E-07     | 2.1E-03 | 9.0E-07 | 1099.7        | 1098.8   | 1290.1   | 563.8         | 389.4    | 450.7    | 231.2    | 334.2    | 241.4    | 164.5    | 227.8    | 195.1    | No                         | No         | No                                                     | No                                                                      | No                                                                  | expressed protein                                        |
| Os.4020.1.S1_at         | LOC_Os10g02380 | 11      | 1.4E-09       | 8.5E-05 | 7.3E-05 | 4.5E-07     | 5.4E-03 | 2.0E-02 | 4911.5        | 6169.9   | 5513.1   | 2487.4        | 3332.7   | 2316.7   | 87.2     | 116.9    | 113.6    | 184.4    | 217.7    | 87.8     | No                         | Yes        | No                                                     | No                                                                      | No                                                                  | NAD(P)H-dependent oxidoreductase, putative, expressed    |
| Os.46268.1.S1_at        | LOC_Os10g02390 | 14      | 4.0E-05       | 2.1E-05 | 1.6E-04 | 5.1E-04     | 2.1E-03 | 4.2E-02 | 936.5         | 1256     | 1366.1   | 1617.6        | 1508.8   | 1508.8   | 1764.3   | 1617.6   | 1610.5   | 10672.4  | 7476.9   | Yes      | No                         | Yes        | Yes                                                    | Yes                                                                     | Yes                                                                 | NAD(P)H-dependent oxidoreductase, putative, expressed    |
| OsAffix.12171.1.S1_at   | LOC_Os10g03400 | 10      | 2.2E-08       | 7.5E-10 | 1.2E-08 | 2.5E-06     | 7.4E-05 | 7.8E-05 | 110.1         | 135.7    | 74       | 346           | 238.6    | 284.1    | 79.5     | 70.3     | 51       | 827.3    | 778.9    | 816      | No                         | No         | Yes                                                    | Yes                                                                     | Yes                                                                 | CRAL/TRIO, N-terminus family protein, expressed          |
| Os.47706.2.A1_at        | LOC_Os10g03570 | 3       | 8.1E-08       | 9.3E-05 | 2.4E-04 | 5.8E-06     | 5.8E-03 | 4.4E-02 | 474.6         | 589.9    | 588      | 287.4         | 307.4    | 424.4    | 77.2     | 74.2     | 43.7     | 56.7     | 61.2     | 32.5     | Yes                        | Yes        | Yes                                                    | Yes                                                                     | Yes                                                                 | BGH1A, putative                                          |
| Os.10358.1.A1_at        | LOC_Os10g04270 | 9       | 5.1E-10       | 1.4E-04 | 1.6E-05 | 2.5E-07     | 1.6E-03 | 7.7E-03 | 1898.1        | 1679.9   | 1898.6   | 3225.5        | 2690.7   | 3038.5   | 28.6     | 40       | 55.9     | 59.1     | 67.8     | 23.5     | Yes                        |            |                                                        |                                                                         |                                                                     |                                                          |

| Probe Set ID           | Locus ID       | probe # | ANOVA p-value |         |         | FDR q-value |         |         | Nipponbare MW |          |          | Nipponbare CK |          |          | 93-11 MW |          |          | 93-11 CK |          |          | Indel (Indica vs Japonica) |                      |          | Annotation                                                       |
|------------------------|----------------|---------|---------------|---------|---------|-------------|---------|---------|---------------|----------|----------|---------------|----------|----------|----------|----------|----------|----------|----------|----------|----------------------------|----------------------|----------|------------------------------------------------------------------|
|                        |                |         | C             | T       | CxT     | C           | T       | CxT     | Repeat 1      | Repeat 2 | Repeat 3 | Repeat 1      | Repeat 2 | Repeat 3 | Repeat 1 | Repeat 2 | Repeat 3 | Repeat 1 | Repeat 2 | Repeat 3 | Indel                      | (Indica vs Japonica) |          |                                                                  |
|                        |                |         |               |         |         |             |         |         |               |          |          |               |          |          |          |          |          |          |          |          |                            |                      | upstream |                                                                  |
| Os.38110.1.S1_at       | LOC_Os10g37660 | 6       | 3.3E-07       | 5.2E-05 | 5.2E-05 | 1.5E-05     | 3.8E-03 | 1.6E-02 | 460.7         | 353.9    | 373.3    | 212.6         | 199.2    | 199      | 121.3    | 89.8     | 85.1     | 113.1    | 49       | 74.3     | No                         | No                   | No       | trehalase precursor, putative, expressed                         |
| Os.51639.1.S1_x_at     | LOC_Os10g38040 | 4       | 9.3E-07       | 1.7E-05 | 2.4E-04 | 3.1E-05     | 1.8E-03 | 4.4E-02 | 1107.1        | 1072.7   | 922      | 632.7         | 638.1    | 676      | 473.4    | 390.4    | 418.9    | 356.6    | 317.8    | 326.3    | No                         | No                   | No       | lysR domain containing protein, expressed                        |
| Os.36568.1.S1_x_at     | LOC_Os10g38150 | 4       | 2.9E-07       | 4.3E-06 | 1.5E-04 | 1.4E-05     | 7.0E-04 | 3.3E-02 | 770.2         | 766.3    | 823      | 489.9         | 386.9    | 424.7    | 542.9    | 522.7    | 648      | 395.6    | 352.1    | 406.9    | Yes                        | Yes                  | Yes      | glutathione S-transferase GSTU6, putative, expressed             |
| Os.49755.1.S1_at       | LOC_Os10g38189 | 11      | 3.3E-10       | 5.8E-08 | 1.2E-07 | 2.0E-07     | 4.1E-05 | 3.2E-04 | 97.6          | 140.5    | 107.5    | 47.1          | 138.9    | 79       | 5483.3   | 5333.9   | 5819.1   | 2373.8   | 1713.6   | 2028.9   | Yes                        | Yes                  | Yes      | glutathione S-transferase GSTU6, putative, expressed             |
| Os.9013.1.S1_at        | LOC_Os10g38340 | 11      | 1.3E-10       | 1.2E-10 | 3.2E-10 | 1.1E-07     | 1.4E-06 | 1.0E-05 | 11630.5       | 16254.3  | 12899.7  | 604.6         | 721.2    | 805.8    | 36       | 100.5    | 157.9    | 35.4     | 130.8    | 19.2     | Yes                        | No                   | Yes      | glutathione S-transferase GSTU6, putative, expressed             |
| Os.46635.1.S1_x_at     | LOC_Os10g38350 | 8       | 1.4E-07       | 2.6E-09 | 4.8E-07 | 8.2E-06     | 6.4E-06 | 8.1E-04 | 1745.4        | 1610.3   | 1383.3   | 281.2         | 302.6    | 305.3    | 1005.4   | 1049.1   | 1222.7   | 267.8    | 144.4    | 101.6    | Yes                        | Yes                  | Yes      | glutathione S-transferase GSTU6, putative, expressed             |
| Os.13015.1.S1_at       | LOC_Os10g38360 | 8       | 4.2E-11       | 1.0E-09 | 9.2E-10 | 6.2E-08     | 3.6E-06 | 1.5E-05 | 10559.6       | 7229.2   | 9253.9   | 1395.7        | 1165.7   | 1019.8   | 128.4    | 94.4     | 19.2     | 173.5    | 243.3    | 42.3     | Yes                        | Yes                  | Yes      | glutathione S-transferase GSTU6, putative, expressed             |
| Os.47438.1.S1_at       | LOC_Os10g38470 | 10      | 1.1E-19       | 9.7E-11 | 9.3E-11 | 3.1E-08     | 4.5E-06 | 1.4E-04 | 11.7          | 18.5     | 8        | 25.9          | 20.2     | 914.5    | 1038.2   | 1632     | 292      | 368.9    | 387      | Yes      | Yes                        | Yes                  | Yes      | glutathione S-transferase GSTU6, putative, expressed             |
| Os.5441.1.S1_at        | LOC_Os10g38470 | 8       | 2.3E-08       | 2.3E-06 | 2.8E-06 | 2.5E-06     | 4.6E-04 | 2.4E-03 | 537.6         | 703.4    | 734.2    | 161           | 160.2    | 250.6    | 34.3     | 17.3     | 5.7      | 23.6     | 23       | 25.5     | Yes                        | Yes                  | Yes      | glutathione S-transferase GSTU6, putative, expressed             |
| Os.46634.1.S1_x_at     | LOC_Os10g38489 | 3       | 2.1E-07       | 2.1E-08 | 2.3E-05 | 1.1E-05     | 2.2E-05 | 9.7E-03 | 226.6         | 301.3    | 175.2    | 211.8         | 252.9    | 146.2    | 497      | 653.4    | 639.2    | 334.4    | 344.4    | 357.1    | Yes                        | No                   | Yes      | glutathione S-transferase GSTU6, putative, expressed             |
| Os.2612.1.S1_at        | LOC_Os10g38495 | 8       | 6.5E-06       | 3.8E-09 | 3.2E-06 | 1.3E-04     | 8.1E-06 | 2.7E-03 | 11416         | 12374.7  | 12771.7  | 1001.2        | 723.2    | 999      | 7364.7   | 7441     | 8347.7   | 2211.1   | 1480.2   | 1769.3   | Yes                        | No                   | No       | glutathione S-transferase GSTU6, putative, expressed             |
| Os.7794.1.S1_at        | LOC_Os10g38501 | 10      | 1.3E-12       | 1.2E-11 | 3.3E-11 | 1.2E-08     | 4.5E-07 | 2.0E-05 | 13154.9       | 13205.8  | 12515.4  | 3377.2        | 3274.8   | 3354.1   | 4702.2   | 4918.9   | 1043.9   | 1224.7   | 1191.9   | 1280.7   | No                         | No                   | Yes      | glutathione S-transferase GSTU6, putative, expressed             |
| Os.7732.1.S1_at        | LOC_Os10g38630 | 6       | 1.2E-11       | 5.2E-05 | 5.8E-05 | 3.2E-08     | 3.9E-03 | 1.8E-02 | 1860.3        | 1613.1   | 1586.7   | 1467.6        | 1170.6   | 1143.5   | 2.4      | 22.3     | 3        | 3.2      | 6.6      | 2.9      | Yes                        | Yes                  | No       | glutathione S-transferase GSTU6, putative, expressed             |
| Os.21842.1.S1_at       | LOC_Os10g38670 | 10      | 3.4E-07       | 1.6E-07 | 2.1E-06 | 1.6E-05     | 7.9E-05 | 2.1E-03 | 719.8         | 671.1    | 831.8    | 4755.6        | 2265.1   | 1898.8   | 1792.4   | 1804.8   | 1908.4   | 1538.2   | 1291     | 1533.9   | No                         | No                   | Yes      | glutathione S-transferase GSTU6, putative, expressed             |
| OsAffx.20172.1.S1_at   | LOC_Os10g38730 | 9       | 6.8E-10       | 7.5E-07 | 7.3E-06 | 3.0E-07     | 2.2E-04 | 4.5E-03 | 1268.3        | 955.2    | 927.4    | 679.3         | 601.4    | 118.3    | 85.6     | 118.3    | 162      | 123.6    | 105.3    | 191      | Yes                        | No                   | No       | glutathione S-transferase GSTU6, putative, expressed             |
| OsAffx.20172.1.S1_x_at | LOC_Os10g38730 | 7       | 9.2E-08       | 9.5E-07 | 3.3E-05 | 6.3E-06     | 2.5E-04 | 1.2E-02 | 1484.2        | 2338.9   | 986.9    | 785.7         | 488.3    | 612.8    | 137.7    | 276.2    | 189      | 174.8    | 201.4    | 199.8    | Yes                        | No                   | No       | glutathione S-transferase GSTU6, putative, expressed             |
| Os.1016.1.S1_at        | LOC_Os10g38740 | 11      | 6.0E-08       | 8.1E-11 | 5.3E-09 | 2.8E-07     | 1.2E-06 | 4.8E-05 | 20074.3       | 2249.2   | 20805.2  | 5105.1        | 3703.3   | 3072.7   | 7751.1   | 6809.6   | 7729     | 1517.3   | 1541.3   | 1368.8   | Yes                        | No                   | Yes      | glutathione S-transferase GSTU6, putative, expressed             |
| Os.9101.1.S1_at        | LOC_Os10g38780 | 10      | 2.2E-10       | 3.3E-08 | 3.3E-06 | 1.5E-07     | 5.9E-04 | 2.7E-03 | 6461.7        | 8917.1   | 7034.3   | 3602.1        | 4542.3   | 4188.4   | 296.8    | 524.6    | 477.1    | 333.6    | 330.7    | 439.5    | No                         | No                   | No       | glutathione S-transferase GSTU6, putative, expressed             |
| Os.46418.1.S1_at       | LOC_Os10g39100 | 4       | 3.1E-09       | 1.3E-08 | 1.6E-07 | 7.3E-07     | 1.6E-05 | 3.9E-04 | 1752          | 1471.9   | 1690.8   | 422.8         | 480.6    | 452.5    | 806.4    | 930.4    | 938      | 318.1    | 244.9    | 312      | No                         | No                   | No       | domain of unknown function DKF614 containing protein, expressed  |
| Os.37813.1.S1_at       | LOC_Os10g39130 | 3       | 1.4E-11       | 2.5E-05 | 2.3E-05 | 3.5E-08     | 2.3E-03 | 9.7E-03 | 156.5         | 138.7    | 156.1    | 142.3         | 190.8    | 134.6    | 164.2    | 1848.6   | 1598.9   | 1241.4   | 1468.2   | 1342.6   | No                         | No                   | No       | MDM5-box transcription factor 56, putative, expressed            |
| OsAffx.20168.1.S1_at   | LOC_Os10g39160 | 9       | 1.6E-05       | 1.9E-06 | 7.5E-05 | 2.5E-04     | 4.1E-04 | 2.1E-02 | 6             | 2.9      | 1.6      | 206.4         | 78.4     | 66.5     | 2.6      | 57.1     | 463.3    | 477.8    | 594.5    | 3        | Yes                        | Yes                  | No       | peroxidase 2 precursor, putative                                 |
| Os.22058.1.S1_at       | LOC_Os10g39680 | 5       | 2.1E-08       | 4.5E-05 | 4.5E-05 | 2.4E-06     | 3.5E-03 | 1.5E-02 | 95.8          | 62.1     | 62.7     | 51.3          | 88.5     | 60.4     | 1466.7   | 2254.9   | 1915.5   | 832.4    | 712.2    | 1070.7   | No                         | Yes                  | Yes      | acidic endochitinase Q precursor, putative, expressed            |
| Os.3415.1.S1_at        | LOC_Os10g39680 | 6       | 1.0E-07       | 5.7E-05 | 1.2E-04 | 6.7E-06     | 4.1E-03 | 2.7E-02 | 1405          | 1773.6   | 2019     | 520.8         | 792.1    | 795.7    | 36.5     | 8.4      | 37.5     | 33.2     | 29.8     | 9.7      | Yes                        | Yes                  | Yes      | acidic endochitinase Q precursor, putative, expressed            |
| OsAffx.20155.1.S1_at   | LOC_Os10g39890 | 4       | 3.4E-04       | 4.7E-06 | 7.1E-04 | 2.7E-03     | 7.5E-04 | 8.7E-02 | 3.7           | 5.8      | 8.6      | 508.5         | 179      | 365.2    | 68.7     | 4        | 8.4      | 1024.8   | 599.2    | 1321.9   | No                         | No                   | No       | pollen proteins Ole e I family protein, expressed                |
| Os.46629.1.S1_x_at     | LOC_Os10g40480 | 5       | 4.6E-05       | 2.1E-07 | 1.8E-04 | 5.7E-04     | 9.6E-05 | 3.7E-02 | 330           | 317.8    | 412.6    | 3805.6        | 2238.9   | 3309.5   | 692.8    | 503.8    | 656.5    | 7556.8   | 6134.6   | 5530.2   | No                         | No                   | Yes      | cortical cell-delineating protein precursor, putative, expressed |
| OsAffx.18589.1.S1_x_at | LOC_Os10g40480 | 3       | 1.2E-03       | 3.9E-07 | 7.4E-03 | 7.1E-03     | 1.4E-04 | 3.3E-03 | 497.1         | 686.5    | 814.8    | 683.8         | 1295.7   | 1174.5   | 1458.1   | 1295.7   | 1174.5   | 1093.5   | 1282.5   | 940.5    | No                         | Yes                  | Yes      | cortical cell-delineating protein precursor, putative, expressed |
| Os.6838.1.S1_at        | LOC_Os10g40510 | 6       | 5.5E-06       | 3.1E-07 | 6.3E-05 | 1.1E-04     | 1.2E-04 | 1.8E-02 | 4966.4        | 7224.8   | 7971.6   | 14347.6       | 5847.2   | 5847.2   | 19175.4  | 5847.2   | 10930.9  | 5882.1   | 10071.9  | 5882.1   | No                         | No                   | Yes      | cortical cell-delineating protein precursor, putative, expressed |
| Os.22427.1.S1_at       | LOC_Os10g40520 | 10      | 5.9E-09       | 7.5E-06 | 9.0E-06 | 1.1E-06     | 1.0E-03 | 5.2E-05 | 2428.1        | 3301.3   | 3145.2   | 7206.4        | 8615.1   | 10794.9  | 28.5     | 16.4     | 9.5      | 282.5    | 63       | 39.2     | No                         | No                   | No       | cortical cell-delineating protein precursor, putative, expressed |
| Os.4741.2.S1_x_at      | LOC_Os10g41930 | 11      | 2.7E-10       | 3.8E-10 | 7.9E-10 | 1.7E-07     | 2.2E-06 | 1.5E-05 | 11165.6       | 10530    | 9848.1   | 906.9         | 945.3    | 839.3    | 3074.8   | 2825.2   | 3390     | 482.4    | 422.5    | 549.5    | No                         | No                   | No       | catalytic/ hydrolase, putative, expressed                        |
| Os.4152.1.S1_at        | LOC_Os10g41980 | 9       | 1.1E-08       | 2.2E-05 | 5.8E-05 | 1.6E-06     | 2.2E-03 | 1.7E-02 | 4985.8        | 3931     | 3810.3   | 2570.1        | 2035.5   | 2737.3   | 348      | 495.6    | 557.3    | 57.3     | 104.5    | 136.6    | No                         | Yes                  | Yes      | expressed protein                                                |
| Os.46616.1.S1_at       | LOC_Os10g41980 | 8       | 5.7E-08       | 4.5E-05 | 3.5E-05 | 6.1E-06     | 3.5E-03 | 1.2E-02 | 586.4         | 733.4    | 716.9    | 304.1         | 187.7    | 427      | 29       | 8.2      | 40.8     | 35.4     | 41.8     | 4.6      | No                         | Yes                  | Yes      | expressed protein                                                |
| Os.46616.1.S1_x_at     | LOC_Os10g41980 | 8       | 1.3E-09       | 6.7E-05 | 1.5E-04 | 4.4E-07     | 4.6E-03 | 3.3E-02 | 2012.8        | 1978.7   | 2001     | 1000.4        | 1187.3   | 1219.9   | 74.8     | 203.3    | 63.3     | 52.2     | 103.2    | 46.6     | No                         | Yes                  | Yes      | expressed protein                                                |
| Os.46393.1.S1_x_at     | LOC_Os10g41999 | 4       | 8.2E-08       | 2.6E-04 | 6.5E-04 | 5.9E-06     | 1.2E-02 | 8.2E-02 | 252.5         | 418.2    | 263.1    | 250.3         | 332.8    | 68.4     | 98.3     | 134.5    | 58.8     | 60.8     | 83.2     | Yes      | Yes                        | Yes                  | Yes      | expressed protein                                                |
| Os.16615.1.S1_at       | LOC_Os10g42020 | 11      | 5.8E-10       | 4.7E-07 | 4.7E-07 | 4.2E-07     | 1.6E-04 | 7.9E-04 | 63.5          | 11.7     | 45.6     | 39.4          | 175.7    | 69.2     | 560.3    | 717.7    | 6630.9   | 2189.1   | 2798.4   | 2552.5   | No                         | No                   | No       | expressed protein                                                |
| OsAffx.29329.1.S1_x_at | LOC_Os10g42020 | 3       | 6.9E-06       | 1.7E-03 | 1.3E-03 | 1.3E-04     | 4.3E-02 | 1.2E-01 | 197           | 285.5    | 133      | 82.4          | 119.1    | 95.4     | 34       | 42.1     | 16       | 10.7     | 25.1     | 37.5     | No                         | No                   | No       | expressed protein                                                |
| Os.46613.1.S1_x_at     | LOC_Os10g42900 | 3       | 1.8E-08       | 4.1E-07 | 4.5E-05 | 2.2E-06     | 1.5E-04 | 1.4E-02 | 285           | 224.4    | 236.8    | 608.1         | 471.9    | 445.2    | 695.5    | 511.1    | 1091.1   | 1095.9   | 978.2    | No       | Yes                        | Yes                  | Yes      | peptide transporter PTR2, putative, expressed                    |
| Os.31991.1.S1_at       | LOC_Os10g62290 | 2       | 7.2E-07       | 2.7E-05 | 2.5E-06 | 1.3E-05</   |         |         |               |          |          |               |          |          |          |          |          |          |          |          |                            |                      |          |                                                                  |

| Probe Set ID           | Locus ID       | probe # | ANOVA p-value |         |         | FDR q-value |         |         | Nipponbare MV |          |          | Nipponbare CK |          |          | 93-11 MV |          |          | 93-11 CK |          |          | Indel (Indica vs Japonica) |          |          | Annotation                                               |                                                                          |      |            |          |  |  |          |  |  |          |  |  |          |  |  |          |  |  |      |            |
|------------------------|----------------|---------|---------------|---------|---------|-------------|---------|---------|---------------|----------|----------|---------------|----------|----------|----------|----------|----------|----------|----------|----------|----------------------------|----------|----------|----------------------------------------------------------|--------------------------------------------------------------------------|------|------------|----------|--|--|----------|--|--|----------|--|--|----------|--|--|----------|--|--|------|------------|
|                        |                |         | C             |         |         | C x T       |         |         | T             |          |          | Repeat 1      |          |          | Repeat 2 |          |          | Repeat 3 |          |          | Repeat 1                   |          |          |                                                          | Repeat 2                                                                 |      |            | Repeat 3 |  |  | Repeat 1 |  |  | Repeat 2 |  |  | Repeat 3 |  |  | upstream |  |  | gene | downstream |
|                        |                |         | C             | T       | CxT     | C           | T       | CxT     | Repeat 1      | Repeat 2 | Repeat 3 | Repeat 1      | Repeat 2 | Repeat 3 | Repeat 1 | Repeat 2 | Repeat 3 | Repeat 1 | Repeat 2 | Repeat 3 | Repeat 1                   | Repeat 2 | Repeat 3 |                                                          | upstream                                                                 | gene | downstream |          |  |  |          |  |  |          |  |  |          |  |  |          |  |  |      |            |
| OsAffx.7332.1.S1_at    | LOC_Os11g37940 | 11      | 3.3E-11       | 1.2E-09 | 1.8E-09 | 5.6E-08     | 4.0E-06 | 2.2E-05 | 5765.7        | 4833.7   | 5624.4   | 2018.8        | 1394.3   | 1980.6   | 386.4    | 358      | 455.8    | 386.7    | 405.8    | 420.5    | No                         | No       | No       | win2 precursor, putative, expressed                      |                                                                          |      |            |          |  |  |          |  |  |          |  |  |          |  |  |          |  |  |      |            |
| OsAffx.31373.1.S1_at   | LOC_Os11g38780 | 10      | 4.2E-07       | 3.3E-06 | 4.2E-04 | 1.8E-05     | 5.9E-04 | 3.2E-03 | 826.4         | 1139     | 1212.6   | 131.8         | 252.3    | 273.9    | 149.6    | 327.2    | 202.7    | 30.4     | 18.3     | 125.1    | No                         | No       | No       | calcium ion binding protein, putative                    |                                                                          |      |            |          |  |  |          |  |  |          |  |  |          |  |  |          |  |  |      |            |
| OsAffx.7355.1.S1_at    | LOC_Os11g39530 | 5       | 1.8E-08       | 3.5E-04 | 4.2E-04 | 2.2E-06     | 1.4E-02 | 6.2E-02 | 368           | 365.1    | 258.7    | 590.6         | 515.7    | 24.5     | 3.5      | 4.3      | 1.4      | 22.9     | 2.7      | Yes      | Yes                        | Yes      | Yes      | jacalin-like lectin domain containing protein, expressed |                                                                          |      |            |          |  |  |          |  |  |          |  |  |          |  |  |          |  |  |      |            |
| Os.54291.1.S1_at       | LOC_Os11g42200 | 8       | 1.2E-06       | 2.6E-07 | 8.8E-07 | 3.8E-05     | 1.0E-04 | 1.2E-03 | 337.8         | 314.3    | 337.3    | 26.9          | 64.2     | 11.4     | 37.5     | 132.8    | 64.4     | 56.6     | 35.8     | 2.2      | No                         | No       | No       | laccase LAC2-1, putative, expressed                      |                                                                          |      |            |          |  |  |          |  |  |          |  |  |          |  |  |          |  |  |      |            |
| OsAffx.28903.1.S1_x_at | LOC_Os11g44014 | 4       | 5.7E-10       | 2.6E-05 | 3.3E-05 | 2.7E-07     | 2.5E-03 | 1.2E-02 | 1.7           | 5.4      | 2.4      | 1.5           | 2        | 3.2      | 160.6    | 172.1    | 264.4    | 174      | 140.7    | 133.7    | Yes                        | Yes      | Yes      | Yes                                                      | retrotransposon protein, putative, unclassified                          |      |            |          |  |  |          |  |  |          |  |  |          |  |  |          |  |  |      |            |
| OsAffx.19366.2.S1_at   | LOC_Os11g44170 | 5       | 7.9E-09       | 3.8E-04 | 3.4E-04 | 1.3E-06     | 1.5E-02 | 5.5E-02 | 466.3         | 648.7    | 421.6    | 251.5         | 267.5    | 265.9    | 37       | 19.9     | 4.9      | 2.2      | 4        | 2.1      | Yes                        | Yes      | Yes      | Yes                                                      | conserved hypothetical protein                                           |      |            |          |  |  |          |  |  |          |  |  |          |  |  |          |  |  |      |            |
| OsAffx.31470.1.S1_at   | LOC_Os11g44310 | 5       | 2.0E-05       | 2.1E-05 | 2.2E-04 | 3.0E-04     | 2.1E-03 | 4.1E-02 | 247.7         | 192      | 179      | 9.9           | 52.8     | 100.3    | 32.7     | 46.1     | 4.4      | 25.6     | 32.2     | 7        | No                         | No       | No       | Yes                                                      | expressed protein                                                        |      |            |          |  |  |          |  |  |          |  |  |          |  |  |          |  |  |      |            |
| OsAffx.31467.3.S1_at   | LOC_Os11g44430 | 5       | 1.1E-08       | 3.3E-06 | 1.3E-05 | 5.9E-06     | 5.9E-04 | 6.6E-03 | 306.4         | 308.3    | 200.8    | 146.7         | 171.8    | 111.4    | 5.9      | 5.9      | 25.6     | 6.3      | 46.2     | 45.9     | Yes                        | Yes      | Yes      | Yes                                                      | protein kinase domain containing protein, expressed                      |      |            |          |  |  |          |  |  |          |  |  |          |  |  |          |  |  |      |            |
| OsAffx.31467.3.S1_x_at | LOC_Os11g44430 | 7       | 7.0E-10       | 2.2E-06 | 2.5E-06 | 3.1E-07     | 4.4E-04 | 2.3E-03 | 911.3         | 682.4    | 687.2    | 444.4         | 345.7    | 374.1    | 49.6     | 75.8     | 52.1     | 44.1     | 48.1     | 100.9    | Yes                        | Yes      | Yes      | Yes                                                      | protein kinase domain containing protein, expressed                      |      |            |          |  |  |          |  |  |          |  |  |          |  |  |          |  |  |      |            |
| Os.27110.1.A1_at       | LOC_Os11g44560 | 8       | 1.5E-08       | 4.6E-05 | 3.0E-05 | 1.9E-06     | 3.5E-03 | 1.2E-02 | 1237          | 1151     | 1337.2   | 409.5         | 451.8    | 663.2    | 20.1     | 19.4     | 46.7     | 12.5     | 30       | 37       | Yes                        | Yes      | Yes      | Yes                                                      | protein kinase domain containing protein, expressed                      |      |            |          |  |  |          |  |  |          |  |  |          |  |  |          |  |  |      |            |
| OsAffx.31475.1.S1_at   | LOC_Os11g44630 | 11      | 2.9E-07       | 7.8E-06 | 2.7E-05 | 1.4E-05     | 1.1E-03 | 1.1E-02 | 767.3         | 618      | 544.6    | 214.7         | 252.6    | 333.3    | 29.3     | 22.6     | 21.7     | 30.1     | 47.8     | 21       | Yes                        | Yes      | Yes      | Yes                                                      | expressed protein                                                        |      |            |          |  |  |          |  |  |          |  |  |          |  |  |          |  |  |      |            |
| OsAffx.19384.1.S1_at   | LOC_Os11g45160 | 4       | 9.9E-06       | 8.4E-05 | 1.2E-04 | 1.8E-04     | 5.4E-03 | 1.7E-02 | 22.5          | 29.6     | 25.9     | 52.8          | 44.2     | 53.2     | 0.9      | 7.6      | 0.9      | 4.8      | 1        | 5.3      | Yes                        | Yes      | Yes      | Yes                                                      | NBS-LRR disease resistance protein, putative                             |      |            |          |  |  |          |  |  |          |  |  |          |  |  |          |  |  |      |            |
| OsAffx.19384.1.S1_x_at | LOC_Os11g45160 | 4       | 5.1E-05       | 3.8E-05 | 5.8E-05 | 6.1E-04     | 3.1E-03 | 1.8E-02 | 58.7          | 49.1     | 44.7     | 146.3         | 139.5    | 131.2    | 40.4     | 23.5     | 21.7     | 27.5     | 66.9     | 47.6     | Yes                        | Yes      | Yes      | Yes                                                      | NBS-LRR disease resistance protein, putative                             |      |            |          |  |  |          |  |  |          |  |  |          |  |  |          |  |  |      |            |
| OsAffx.19399.1.S1_at   | LOC_Os11g45970 | 15      | 5.0E-05       | 3.2E-05 | 1.9E-04 | 6.1E-04     | 2.8E-03 | 3.8E-02 | 35.8          | 115.9    | 51       | 237.7         | 219.5    | 237.6    | 31.2     | 36.2     | 23.7     | 71.1     | 85.1     | 81.3     | No                         | Yes      | Yes      | Yes                                                      | NBS-LRR disease resistance protein, putative, expressed                  |      |            |          |  |  |          |  |  |          |  |  |          |  |  |          |  |  |      |            |
| Os.19895.1.S1_at       | LOC_Os11g46860 | 11      | 7.9E-12       | 7.1E-08 | 9.8E-08 | 2.7E-08     | 4.7E-05 | 2.9E-04 | 210.5         | 229.5    | 252.3    | 275.5         | 620.4    | 578.6    | 11424.1  | 12387.3  | 11508.2  | 18493.4  | 18937.2  | 17343.3  | Yes                        | Yes      | No       | Yes                                                      | protein kinase, putative, expressed                                      |      |            |          |  |  |          |  |  |          |  |  |          |  |  |          |  |  |      |            |
| Os.25171.1.A1_at       | LOC_Os11g47140 | 9       | 2.0E-08       | 2.0E-05 | 2.2E-05 | 2.4E-06     | 2.0E-03 | 9.4E-03 | 809.8         | 973.5    | 1326.6   | 2572.5        | 2286.7   | 2049.6   | 28.4     | 49.3     | 18.9     | 68.5     | 36.8     | 61.1     | Yes                        | Yes      | Yes      | Yes                                                      | OsWAK123 - OsWAK receptor-like protein kinase, expressed                 |      |            |          |  |  |          |  |  |          |  |  |          |  |  |          |  |  |      |            |
| Os.25171.2.S1_at       | LOC_Os11g47140 | 8       | 6.5E-08       | 6.1E-05 | 1.0E-04 | 6.0E-06     | 4.3E-03 | 2.5E-02 | 93.9          | 61.2     | 104.8    | 33.7          | 170.4    | 189.1    | 3.2      | 12.4     | 2.7      | 2.5      | 3.5      | 7.7      | Yes                        | Yes      | Yes      | Yes                                                      | OsWAK123 - OsWAK receptor-like protein kinase, expressed                 |      |            |          |  |  |          |  |  |          |  |  |          |  |  |          |  |  |      |            |
| OsAffx.19414.2.S1_at   | LOC_Os11g47150 | 5       | 8.6E-06       | 1.8E-05 | 7.1E-06 | 1.6E-04     | 1.9E-04 | 4.4E-03 | 64.4          | 76.5     | 25       | 180.3         | 254      | 144.6    | 15.6     | 37.5     | 29.6     | 7.1      | 17.4     | 28       | Yes                        | Yes      | Yes      | Yes                                                      | OsWAK122 - OsWAK receptor-like protein kinase                            |      |            |          |  |  |          |  |  |          |  |  |          |  |  |          |  |  |      |            |
| Os.172.1.S1_a_at       | LOC_Os11g47500 | 7       | 2.8E-08       | 3.7E-08 | 3.3E-08 | 2.9E-06     | 3.2E-05 | 1.5E-04 | 1826.6        | 1491.1   | 1817.5   | 43.2          | 123.6    | 67.2     | 71.4     | 54       | 38.2     | 3.8      | 7.9      | 11.7     | Yes                        | Yes      | Yes      | Yes                                                      | xylanase inhibitor protein 1 precursor, putative, expressed              |      |            |          |  |  |          |  |  |          |  |  |          |  |  |          |  |  |      |            |
| Os.25497.1.S1_at       | LOC_Os11g47500 | 10      | 6.6E-08       | 1.9E-07 | 2.0E-07 | 5.1E-06     | 8.8E-05 | 4.5E-04 | 15.6          | 18.9     | 27.3     | 2.8           | 46.6     | 1.5      | 3090.2   | 4408.4   | 3508.5   | 233.3    | 306.1    | 301.1    | Yes                        | Yes      | Yes      | Yes                                                      | xylanase inhibitor protein 1 precursor, putative, expressed              |      |            |          |  |  |          |  |  |          |  |  |          |  |  |          |  |  |      |            |
| Os.25497.1.S1_x_at     | LOC_Os11g47500 | 10      | 1.5E-07       | 1.8E-07 | 2.7E-07 | 8.7E-06     | 8.8E-05 | 5.7E-04 | 15.2          | 2        | 8.1      | 1             | 46.2     | 0.7      | 3522.3   | 3935     | 2813.5   | 177.9    | 227.2    | 220.2    | Yes                        | Yes      | Yes      | Yes                                                      | xylanase inhibitor protein 1 precursor, putative, expressed              |      |            |          |  |  |          |  |  |          |  |  |          |  |  |          |  |  |      |            |
| Os.4670.1.S1_at        | LOC_Os11g47510 | 3       | 3.5E-08       | 6.1E-09 | 3.6E-08 | 3.3E-06     | 1.0E-05 | 1.6E-04 | 23.5          | 44.3     | 77       | 20.3          | 32.5     | 20       | 77.7     | 57.3     | 30.9     | 29.2     | 31.5     | 31.8     | No                         | No       | No       | Yes                                                      | xylanase inhibitor protein 1 precursor, putative, expressed              |      |            |          |  |  |          |  |  |          |  |  |          |  |  |          |  |  |      |            |
| Os.9347.1.S1_at        | LOC_Os11g47580 | 4       | 8.3E-07       | 6.7E-08 | 1.5E-06 | 2.9E-05     | 4.5E-05 | 1.6E-03 | 781.4         | 527.6    | 736.2    | 62.7          | 77.9     | 83.1     | 142      | 154.8    | 312.8    | 32.7     | 39.2     | 24.1     | No                         | No       | No       | Yes                                                      | xylanase inhibitor protein 1 precursor, putative, expressed              |      |            |          |  |  |          |  |  |          |  |  |          |  |  |          |  |  |      |            |
| Os.55400.2.S1_at       | LOC_Os11g47670 | 4       | 1.7E-08       | 7.5E-08 | 5.8E-08 | 2.1E-06     | 4.8E-05 | 1.2E-04 | 211.1         | 54.2     | 186.7    | 78            | 95.6     | 61.2     | 53       | 60.7     | 3.5      | 42.9     | 42       | 63       | Yes                        | Yes      | Yes      | Yes                                                      | pathogenesis-related protein 5 precursor, putative, expressed            |      |            |          |  |  |          |  |  |          |  |  |          |  |  |          |  |  |      |            |
| OsAffx.19428.1.S1_s_at | LOC_Os11g47680 | 7       | 1.8E-10       | 1.2E-08 | 1.2E-08 | 1.3E-07     | 1.5E-05 | 7.8E-05 | 1208.8        | 1126.1   | 1220.6   | 234           | 345.9    | 260.2    | 153.2    | 255.8    | 231.8    | 34.6     | 93.4     | 94.9     | Yes                        | No       | No       | No                                                       | thaumatin-like protein 2 precursor, putative, expressed                  |      |            |          |  |  |          |  |  |          |  |  |          |  |  |          |  |  |      |            |
| OsAffx.19473.1.S1_at   | LOC_Os12g03740 | 7       | 1.4E-10       | 1.1E-07 | 1.1E-07 | 1.2E-07     | 6.2E-05 | 3.2E-04 | 835.8         | 892.9    | 906      | 408.6         | 505.3    | 475.3    | 18.2     | 55.6     | 53.6     | 7.4      | 4.6      | 21.1     | No                         | Yes      | No       | No                                                       | ATPP2-B10, putative, expressed                                           |      |            |          |  |  |          |  |  |          |  |  |          |  |  |          |  |  |      |            |
| OsAffx.19473.1.S1_x_at | LOC_Os12g03740 | 9       | 5.3E-09       | 4.6E-06 | 4.6E-05 | 1.4E-06     | 7.3E-04 | 1.5E-02 | 1478.2        | 1693.7   | 1815.5   | 703.4         | 989.2    | 849.1    | 88.4     | 95.2     | 100.4    | 53.3     | 73.3     | 53.8     | No                         | Yes      | No       | No                                                       | ATPP2-B10, putative, expressed                                           |      |            |          |  |  |          |  |  |          |  |  |          |  |  |          |  |  |      |            |
| Os.9752.2.S1_x_at      | LOC_Os12g03899 | 9       | 9.7E-05       | 9.6E-08 | 5.0E-05 | 1.0E-03     | 5.8E-05 | 1.6E-02 | 2564.1        | 2697.9   | 2602.2   | 1183.7        | 1428.8   | 1369.5   | 2162     | 2373.4   | 2309.6   | 1574.2   | 1601.2   | 1839.3   | Yes                        | Yes      | No       | No                                                       | carbohydrate transporter/ sugar porter/ transporter, putative, expressed |      |            |          |  |  |          |  |  |          |  |  |          |  |  |          |  |  |      |            |
| Os.5943.1.S1_at        | LOC_Os12g04150 | 3       | 1.2E-08       | 2.0E-06 | 8.9E-05 | 1.7E-06     | 4.2E-04 | 2.3E-02 | 12345.4       | 15449.7  | 13099.4  | 7630.2        | 9225.8   | 9680.9   | 4578.7   | 6302.6   | 4734.5   | 2259.2   | 2480.2   | 2481.3   | Yes                        | No       | No       | No                                                       | gibberellin receptor GID1L2, putative, expressed                         |      |            |          |  |  |          |  |  |          |  |  |          |  |  |          |  |  |      |            |
| Os.13051.1.S1_at       | LOC_Os12g04980 | 6       | 9.1E-07       | 3.0E-06 | 4.9E-06 | 3.1E-05     | 5.5E-04 | 3.4E-03 | 81.9          | 93.9     | 74.3     | 47.8          | 57.4     | 69       | 303.1    | 516.1    | 387.3    | 67.6     | 120.2    | 77.7     | No                         | No       | No       | No                                                       | meiotic recombination protein DMC1, putative, expressed                  |      |            |          |  |  |          |  |  |          |  |  |          |  |  |          |  |  |      |            |
| Os.12064.1.S1_at       | LOC_Os12g05080 | 7       | 3.9E-07       | 1.9E-04 | 6.9E-04 | 1.7E-05     | 9.3E-03 | 8.5E-02 | 815.8         | 1057.3   | 874.1    | 540.3         | 556      | 516.2    | 376.5    | 425.9    | 413.5    | 394.2    | 431.2    | 362.4    | No                         | No       | No       | No                                                       | expressed protein                                                        |      |            |          |  |  |          |  |  |          |  |  |          |  |  |          |  |  |      |            |
| OsAffx.19506.1.S1_at   | LOC_Os12g05510 | 7       | 3.9E-05       | 2.3E-07 | 3.8E-05 | 5.0E-04     | 1.0E-04 | 1.3E-02 | 127.2         | 163.6    | 114.5    | 46.1          | 70.7     | 1.4      | 416      | 492.9    | 419.5    | 19.2     | 94.2     | 73.4     | Yes                        | No       | No       | No                                                       | conserved hypothetical protein                                           |      |            |          |  |  |          |  |  |          |  |  |          |  |  |          |  |  |      |            |
| Os.51532.1.S1_at       | LOC_Os12g05840 | 9       | 2.5E-08       | 6.1E-07 | 1.2E-06 | 2.7E-06     | 1.9E-04 | 1.4E-03 | 618.8         | 884      | 589.3    | 153.6         | 106.7    | 127.7    | 111.9    | 112.9    | 165.2    | 137.8    | 67.6     | 95.1     | No                         | No       | No       | No                                                       | germin-like protein subfamily 1 member 8 precursor, putative, expressed  |      |            |          |  |  |          |  |  |          |  |  |          |  |  |          |  |  |      |            |
| Os.55421.1.S1_at       | LOC_Os12g06550 | 3       | 2.3E-06       | 1.4E-07 | 1.6E-04 | 6.0E-05     | 1.8E-02 | 4.5E-04 | 236.9         | 137.5    | 158.7    | 73.1          | 122.7    | 116.9    | 38.8     | 39.8     | 48.9     | 18.1     | 54.6     | 4.3      | No                         | No       | No       | No                                                       | expressed protein                                                        |      |            |          |  |  |          |  |  |          |  |  |          |  |  |          |  |  |      |            |
| Os.47560.1.S1_at       | LOC_Os12g06660 | 5       | 2.2E-06       | 1.6E-07 | 3.3E-05 | 4.5E-05     | 7.9E-05 | 1.2E-02 | 407.3         | 435      | 81       | 1762.3        | 1072     | 1664.7   | 1032.9   | 695.1    | 648      | 3311.2   | 2753.2   | 3123.7   | No                         | No       | Yes      | Yes                                                      | actin-7, putative, expressed                                             |      |            |          |  |  |          |  |  |          |  |  |          |  |  |          |  |  |      |            |
| Os.53000.1.S1_at       | LOC_Os12g06840 | 3       | 3.2E-04       | 6.6E-06 | 4.8E-04 | 2.5E-03     | 8.3E-04 | 6.8E-02 | 23            | 19.6     | 26.7     | 98.2          | 148.7    | 78       | 36.8     | 9.3      | 38.1     | 281.5    | 348.3    | 160.8    | No                         | Yes      | No       | No                                                       | protein binding protein, putative, expressed                             |      |            |          |  |  |          |  |  |          |  |  |          |  |  |          |  |  |      |            |
| Os.17909.1.S1_a_at     | LOC_Os12g08260 | 4       | 7.0E-06       | 1.7E-09 | 2.4E-04 | 1.4E-04     | 4.8E-06 | 4.4E-02 | 2554.7        | 2117     | 2075.5   | 1235.9        | 1113.5   | 1182.7   | 1575.8   | 1691.3   | 1577.6   | 1183.6   | 1357     |          |                            |          |          |                                                          |                                                                          |      |            |          |  |  |          |  |  |          |  |  |          |  |  |          |  |  |      |            |

| Probe Set ID       | Locus ID    | probe # | ANOVA p-value |         |         | FDR q-value |         |         | Nipponbare MV |          |          | Nipponbare CK |          |          | 93-11 MV |          |          | 93-11 CK |          |          | Indel (Indica vs Japonica) |      |            | Annotation                                                                           |
|--------------------|-------------|---------|---------------|---------|---------|-------------|---------|---------|---------------|----------|----------|---------------|----------|----------|----------|----------|----------|----------|----------|----------|----------------------------|------|------------|--------------------------------------------------------------------------------------|
|                    |             |         | C             | T       | CxT     | C           | T       | CxT     | Repeat 1      | Repeat 2 | Repeat 3 | Repeat 1      | Repeat 2 | Repeat 3 | Repeat 1 | Repeat 2 | Repeat 3 | Repeat 1 | Repeat 2 | Repeat 3 | upstream                   | gene | downstream |                                                                                      |
|                    |             |         |               |         |         |             |         |         |               |          |          |               |          |          |          |          |          |          |          |          |                            |      |            |                                                                                      |
| Os_23059.1.S1_s_at | Not Matched | 4       | 1.4E-04       | 2.0E-05 | 3.0E-03 | 1.3E-03     | 2.0E-03 | 2.0E-01 | 129.4         | 170.7    | 130.6    | 791.2         | 616.8    | 891.5    | 510.7    | 503.3    | 417      | 3112.7   | 1897.7   | 2183.5   | N/A                        | N/A  | N/A        | Transcribed sequence                                                                 |
| Os_23218.1.S1_s_at | Not Matched | 3       | 3.9E-08       | 2.7E-05 | 1.8E-04 | 3.6E-06     | 2.5E-03 | 3.6E-02 | 256.5         | 254.1    | 309.5    | 166           | 229.9    | 284.3    | 953.4    | 1025.8   | 930.5    | 625.9    | 740.4    | 507.6    | N/A                        | N/A  | N/A        | 2279a snoRNA                                                                         |
| Os_24314.1.A1_s_at | Not Matched | 10      | 3.4E-09       | 1.8E-09 | 5.7E-08 | 7.7E-07     | 5.2E-06 | 2.1E-04 | 248.6         | 225.5    | 391.1    | 74.7          | 89.7     | 61.4     | 1312.3   | 1465.9   | 1246     | 189.3    | 277      | 217.8    | N/A                        | N/A  | N/A        | Transcribed sequence                                                                 |
| Os_37844.1.S1_at   | Not Matched | 5       | 1.2E-05       | 9.9E-10 | 2.3E-05 | 2.0E-04     | 3.6E-06 | 9.7E-03 | 1723.7        | 2406.9   | 2261.7   | 93.9          | 156      | 139.8    | 1265.3   | 1492.4   | 1373.3   | 127.4    | 62.8     | 42.7     | N/A                        | N/A  | N/A        | Oryza sativa (japonica cultivar-group) cDNA clone:002-134-B03, full insert sequence. |
| Os_51405.1.S1_at   | Not Matched | 5       | 1.6E-08       | 6.5E-04 | 8.3E-04 | 2.0E-06     | 2.2E-02 | 9.6E-02 | 839.5         | 1030.6   | 1082.5   | 1410.8        | 1514.3   | 1544.2   | 28.6     | 43.1     | 9.9      | 79.1     | 60.3     | 90.6     | N/A                        | N/A  | N/A        | Oryza sativa (japonica cultivar-group) cDNA clone:001-106-D06, full insert sequence. |
| Os_54362.1.S1_at   | Not Matched | 7       | 2.2E-06       | 6.8E-06 | 1.1E-04 | 5.9E-05     | 9.6E-04 | 2.6E-02 | 108.6         | 251.9    | 206      | 17.3          | 67.4     | 71.8     | 475.7    | 430.1    | 443.8    | 107.9    | 144.7    | 221.4    | N/A                        | N/A  | N/A        | Oryza sativa (japonica cultivar-group) cDNA clone:J033135120, full insert sequence.  |
| Os_54387.1.S1_at   | Not Matched | 5       | 8.6E-07       | 2.3E-05 | 1.9E-05 | 2.9E-05     | 2.3E-03 | 8.7E-03 | 342.7         | 236.7    | 238.6    | 151.9         | 121.2    | 192      | 76.3     | 50.9     | 51.3     | 89.3     | 51       | 27.8     | N/A                        | N/A  | N/A        | Oryza sativa (japonica cultivar-group) cDNA clone:J033149A03, full insert sequence.  |
| Os_55079.1.S1_at   | Not Matched | 4       | 1.8E-04       | 2.7E-09 | 1.1E-04 | 1.7E-03     | 6.5E-06 | 2.6E-02 | 3832.9        | 4406.4   | 4747.2   | 160.8         | 178.7    | 208.3    | 2758.9   | 3268.7   | 2905.3   | 267      | 155      | 157.6    | N/A                        | N/A  | N/A        | Oryza sativa (japonica cultivar-group) cDNA clone:002-128-A08, full insert sequence. |

- (a) present the minimum ANOVA test p-value of the probes in the probe set  
(b) present the minimum FDR q-value of the p-values in the probe set  
(c) C presents Cultivar effect of the two-way ANOVA test  
(d) T presents Treatment effect of the two-way ANOVA test  
(e) CxT presents the CultivarxTreatment effect of the two-way ANOVA test  
(f) "Yes" means a possible InDel region in the upstream, gene region, and/or downstream of the gene  
(g) "No" means the gene without InDel region
